# Supplementary material for: A New Family of Homoleptic Copper Complexes of Curcuminoids: Synthesis, Characterization and Biological Properties
Source: PubMed Central journal article supplement (PMC6429335; doi:10.3390/molecules24050910), 2019-03-05
Supplement: molecules-24-00910-s001.pdf [file molecules-24-00910-s001.pdf]

# *Supplementary Information*

## **A New Family of Homoleptic Copper Complexes of Curcuminoids: Synthesis, Characterization and Biological Properties**

*William Meza-Morales, Juan C. Machado-Rodriguez, Yair Alvarez-Ricardo, Marco A. Obregón-Mendoza,  
Antonio Nieto-Camacho, Rubén. A. Toscano, Manuel Soriano-García, Julia Cassani and Raúl G. Enríquez*

**Correspondence:** [cassani@correo.xoc.uam.mx](mailto:cassani@correo.xoc.uam.mx) (J.C.); [enriquezhabib@gmail.com](mailto:enriquezhabib@gmail.com) (R.G.E.); Tel.: +52-5554837255 (J.C.); +52-5556224404 (R.G.E.); Fax: +52-5556224404 (R.G.E.)

## Table of Contents

|                            |    |
|----------------------------|----|
| NUCLEAR MAGNETIC RESONANCE | 3  |
| INFRARED SPECTROSCOPY      | 29 |
| MASS SPECTROMETRY          | 39 |
| DRX SINGLE CRYSTAL         | 49 |

DAC

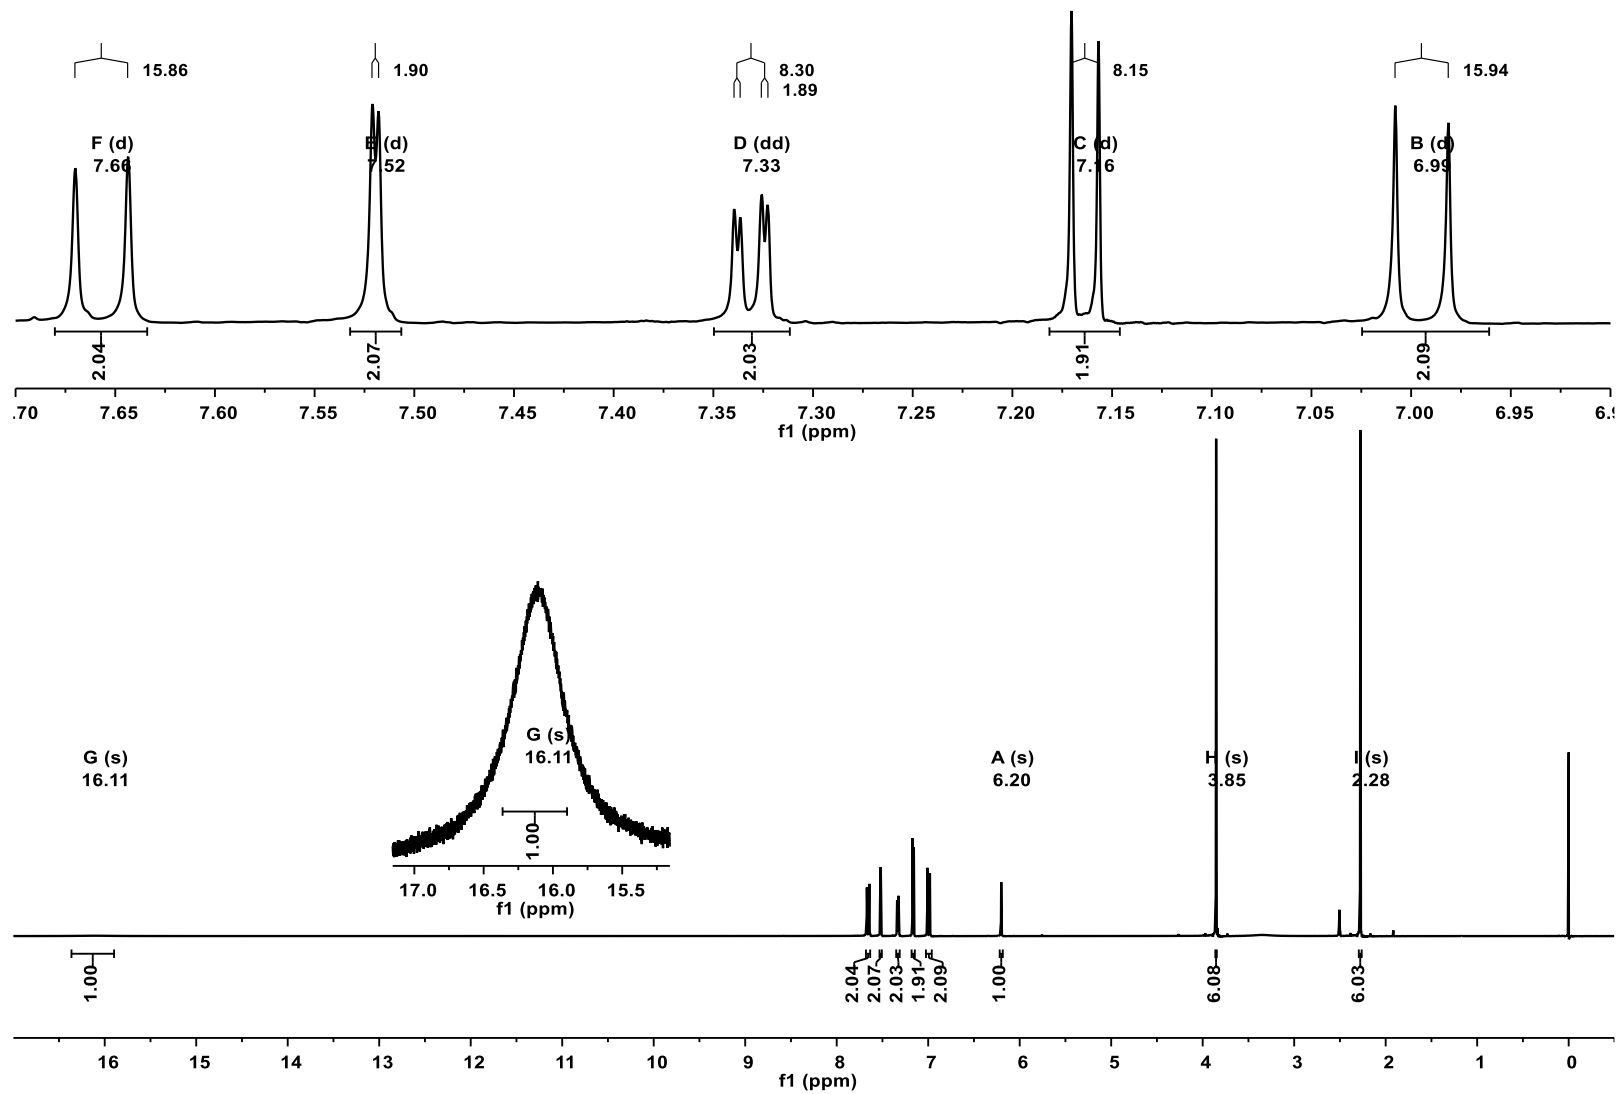

Figure S1. 500 MHz <sup>1</sup>H NMR spectrum of diacetyl-curcumin.

DAC

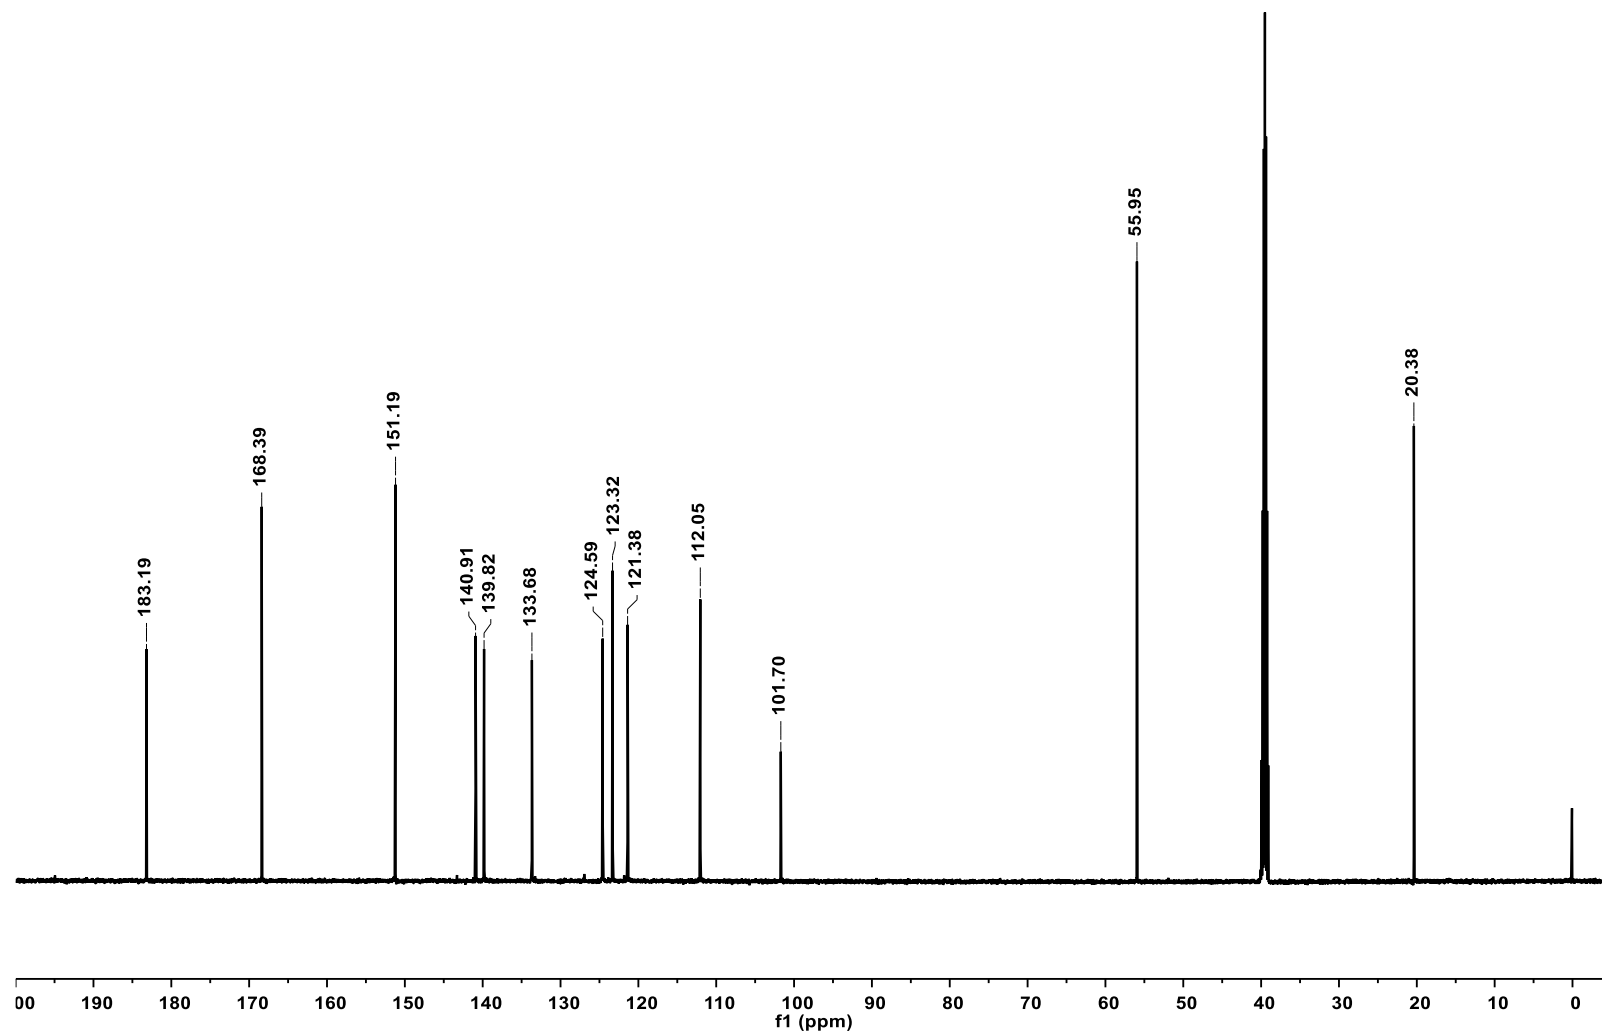

Figure S2. 125 MHz <sup>13</sup>C NMR spectrum of diacetyl-curcumin.

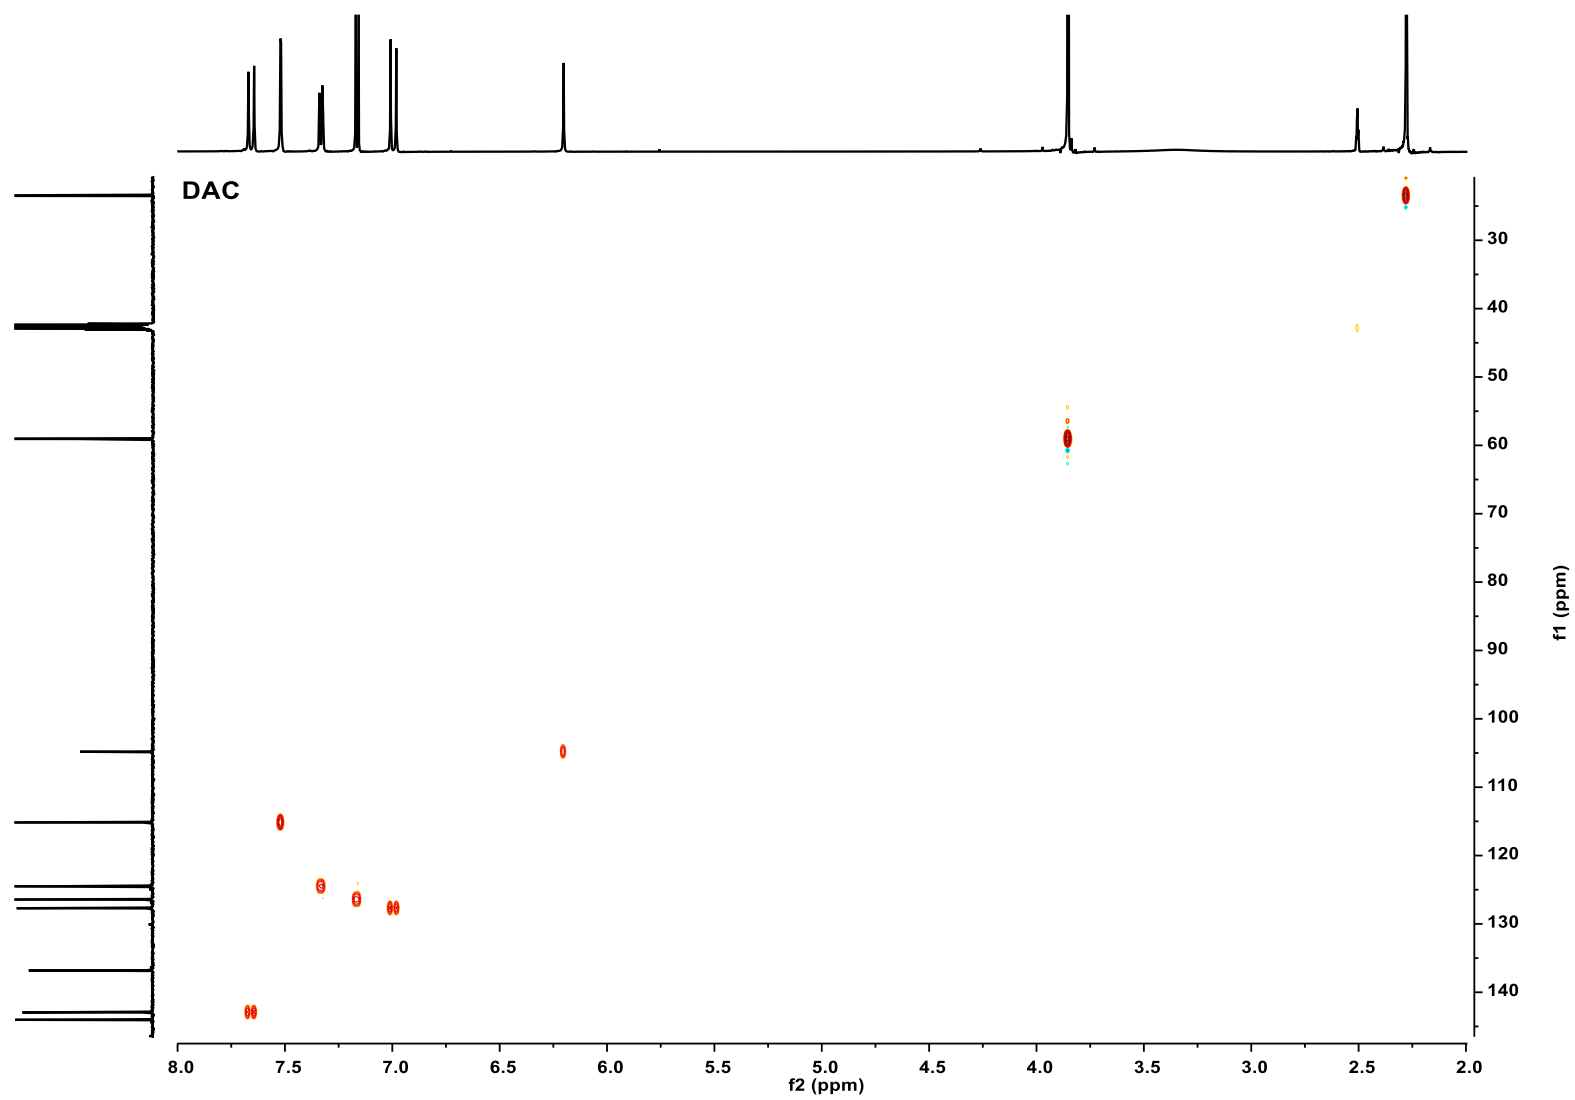

Figure S3. 500 MHz HSQC NMR spectrum of diacetyl-curcumin.

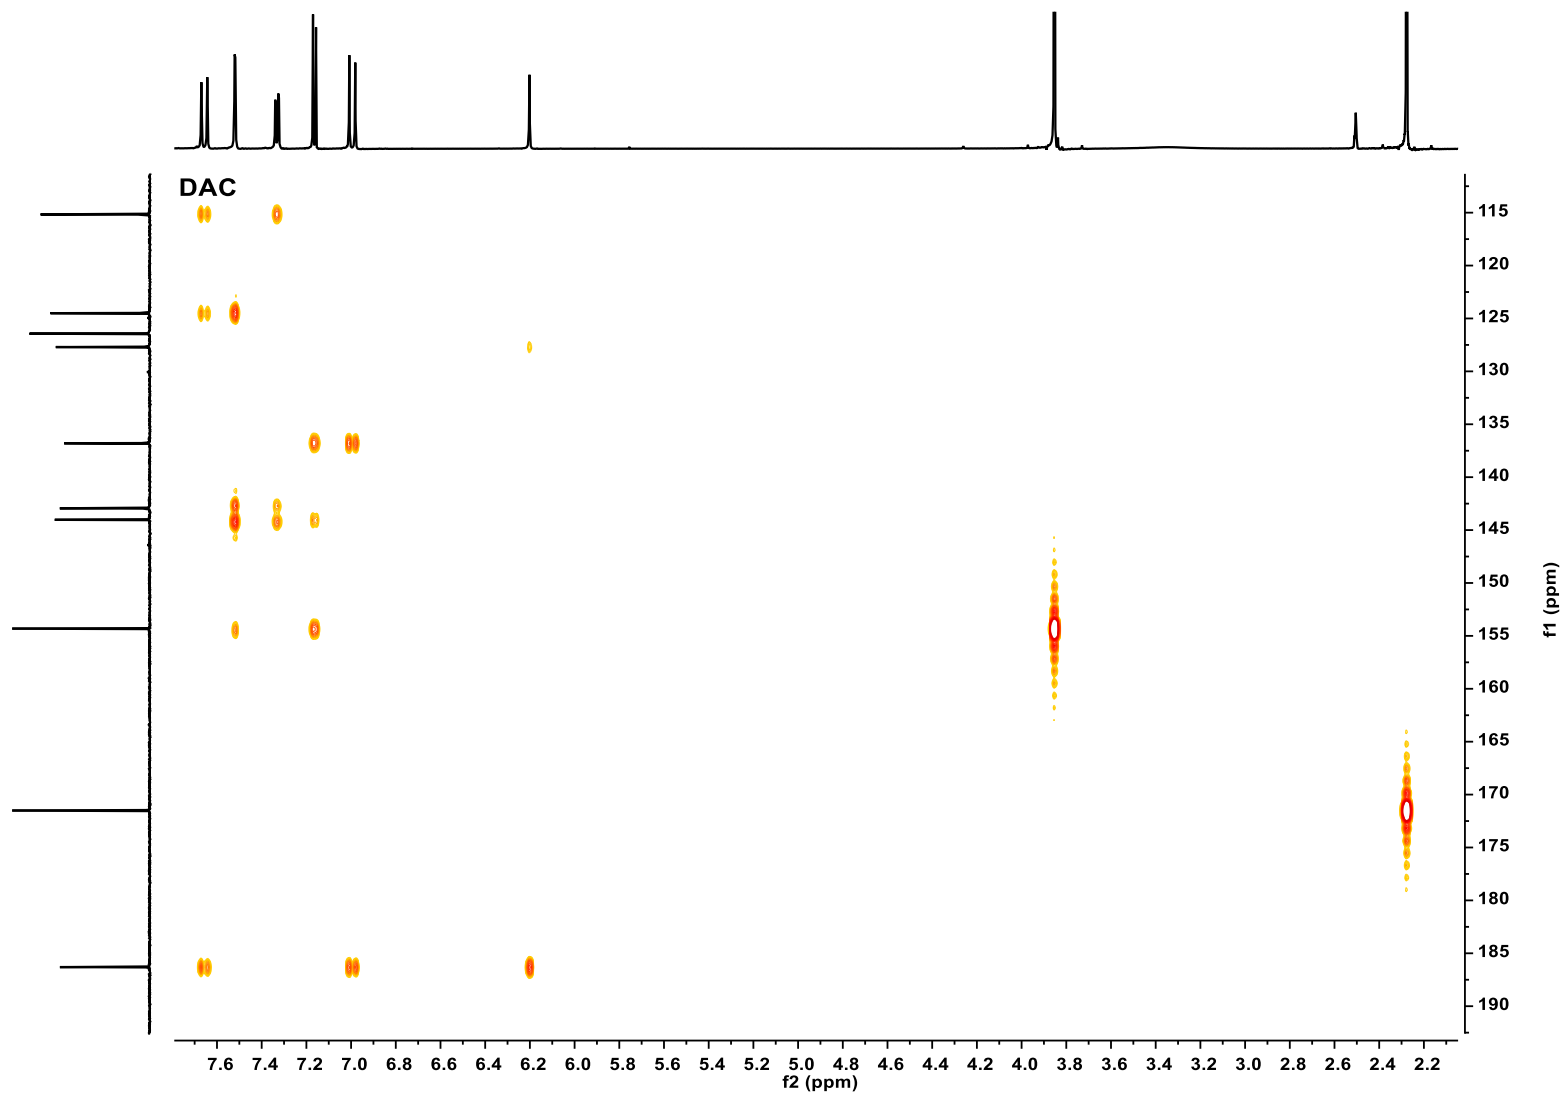

Figure S4. 500 MHz HMBC NMR spectrum of diacetyl-curcumin.

DACH

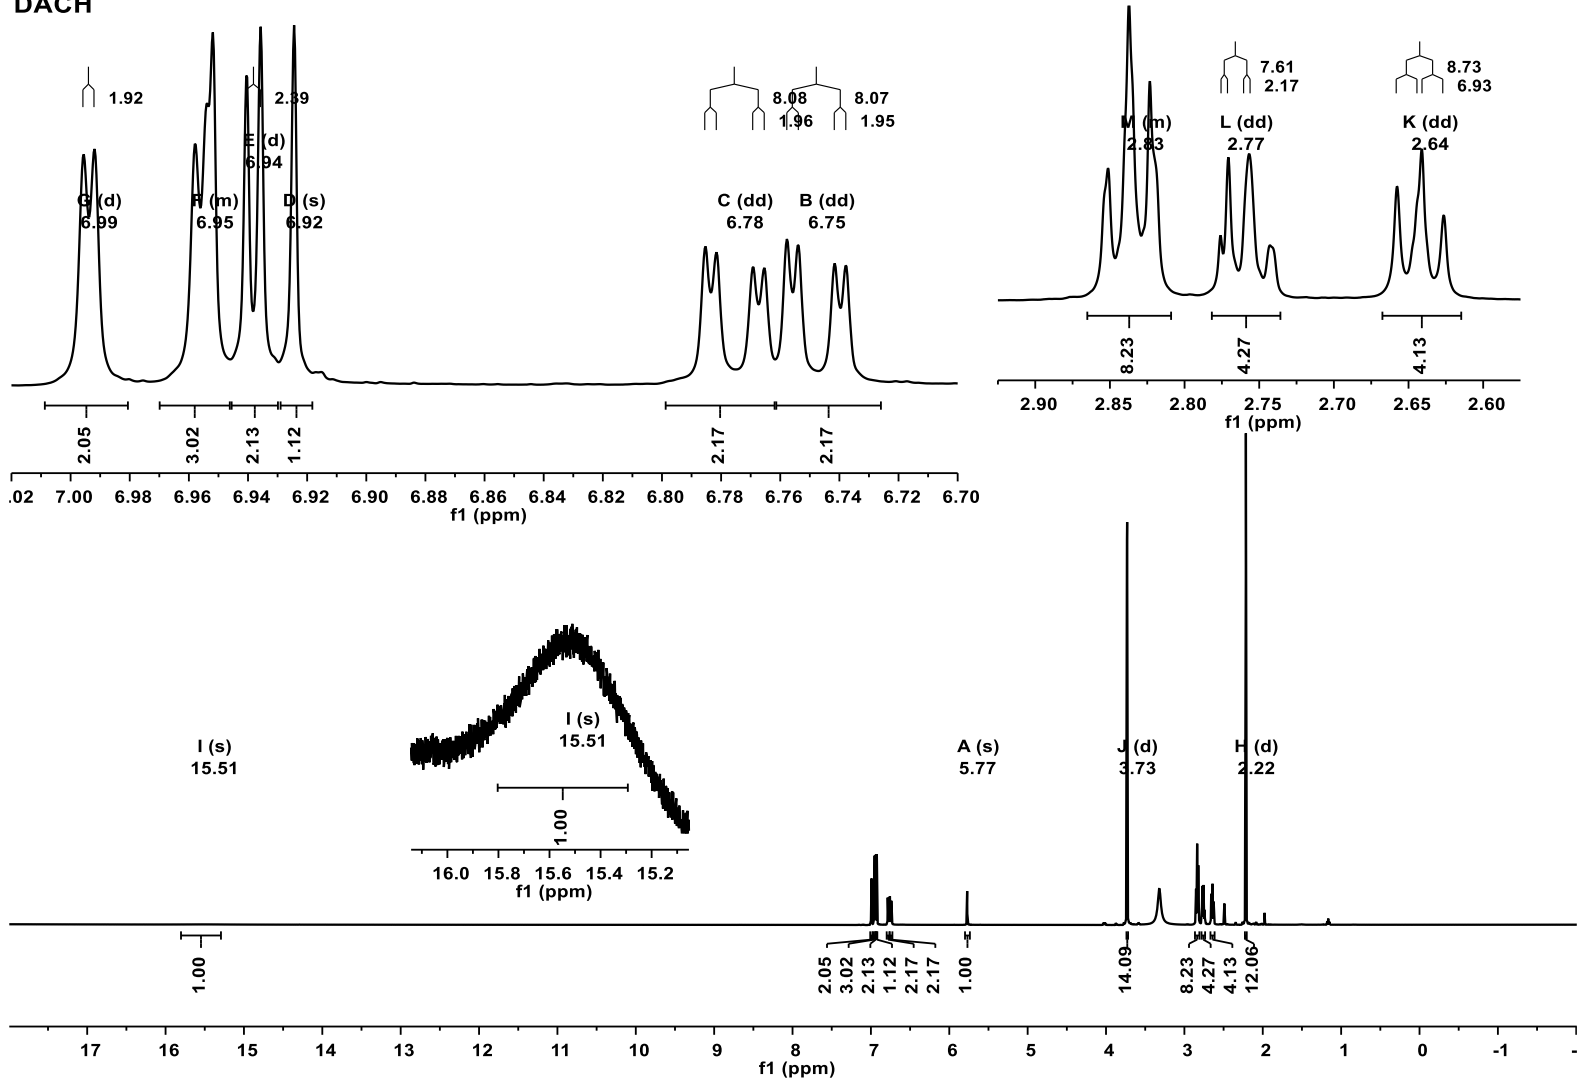

Figure S5. 500 MHz <sup>1</sup>H NMR spectrum of hydrogenated diacetyl-curcumin.

DACH

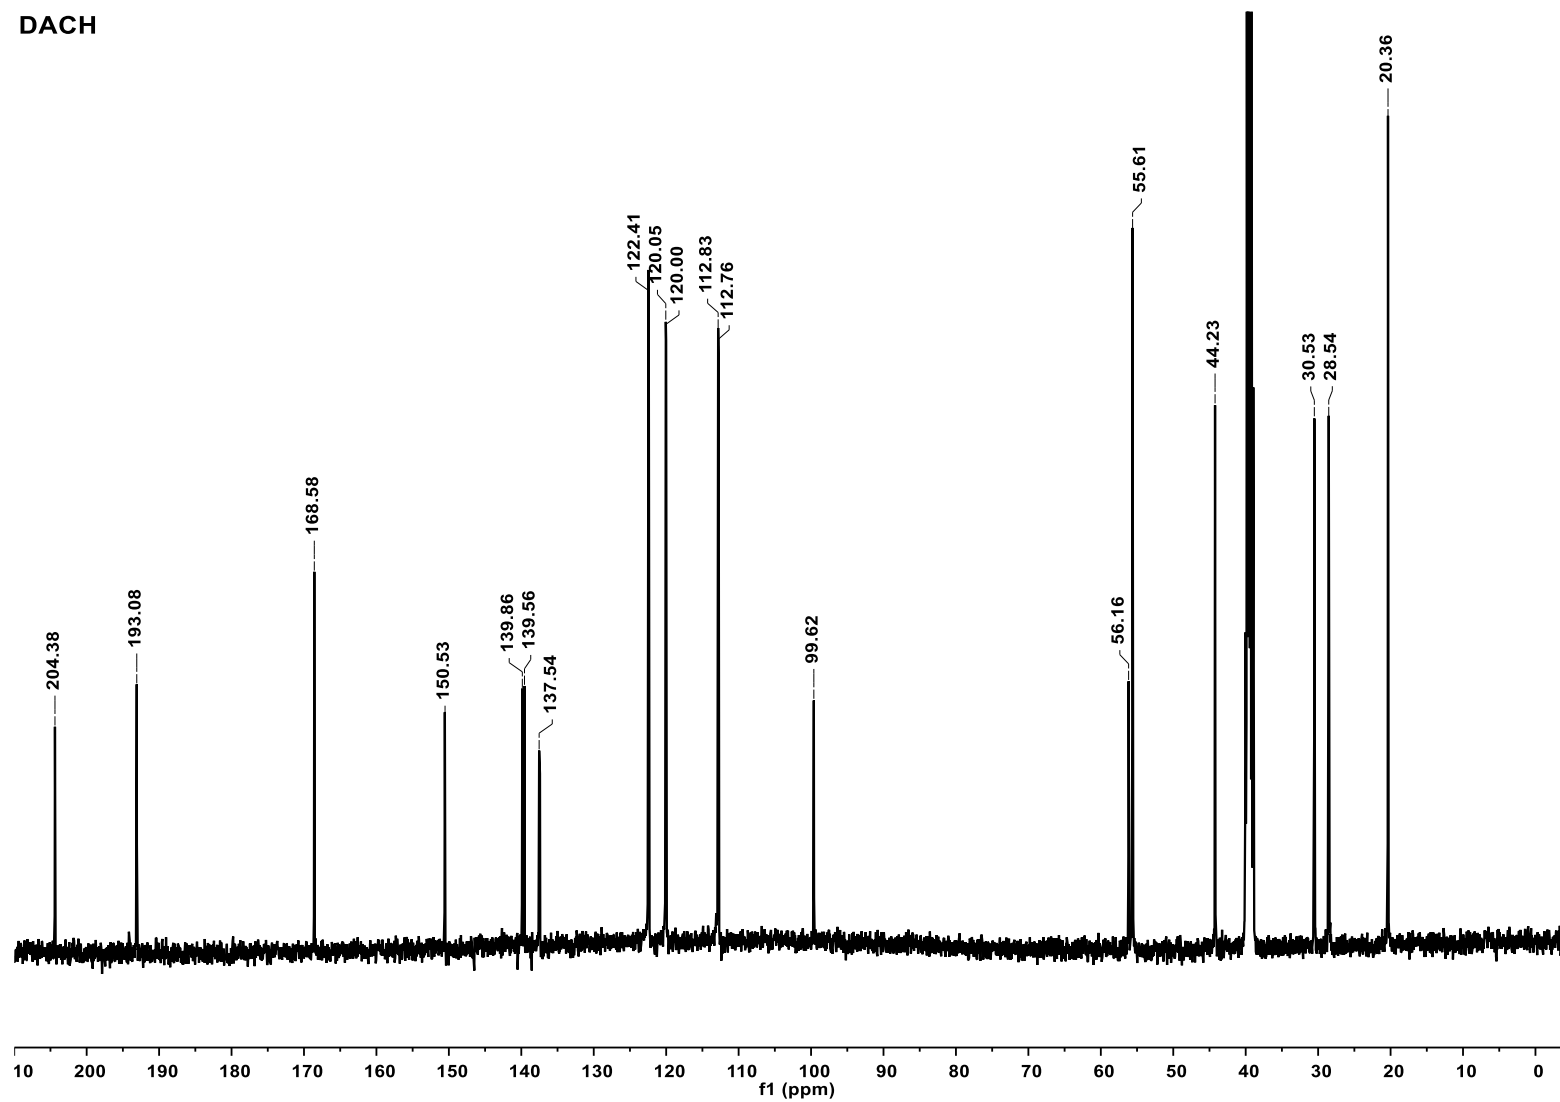

Figure S6. 125 MHz <sup>13</sup>C NMR spectrum of hydrogenated diacetyl-curcumin.



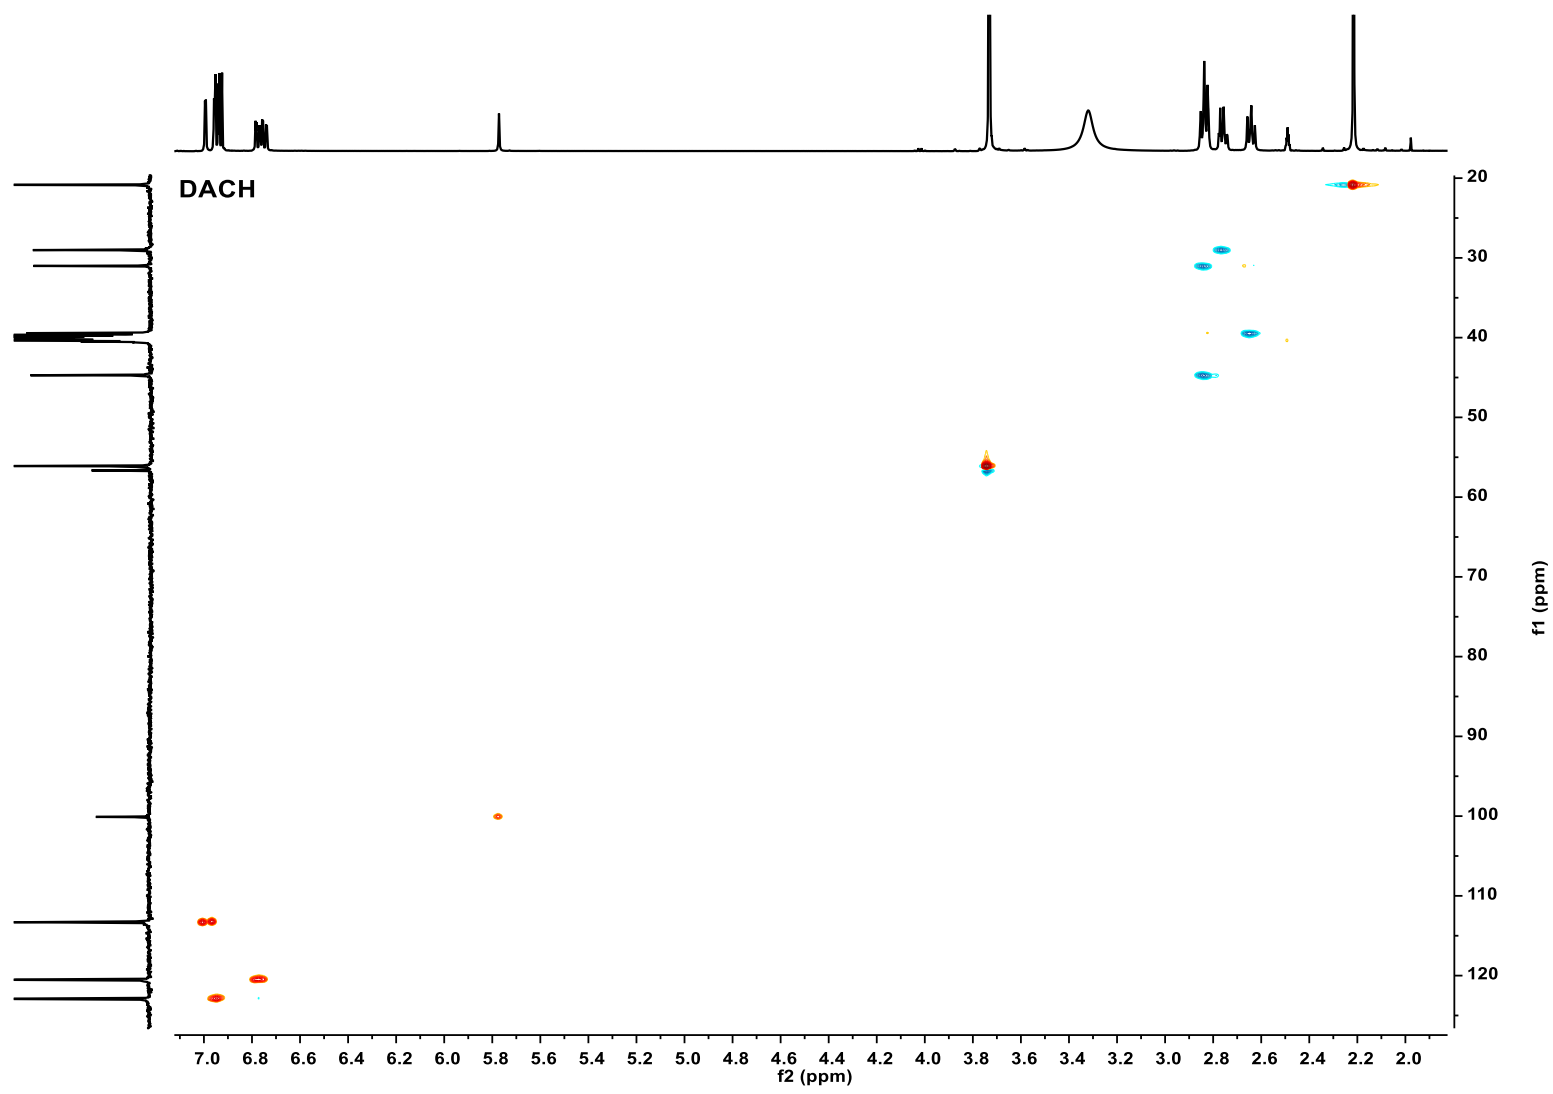

Figure S7. 500 MHz HSQC NMR spectrum of hydrogenated diacetyl-curcumin.

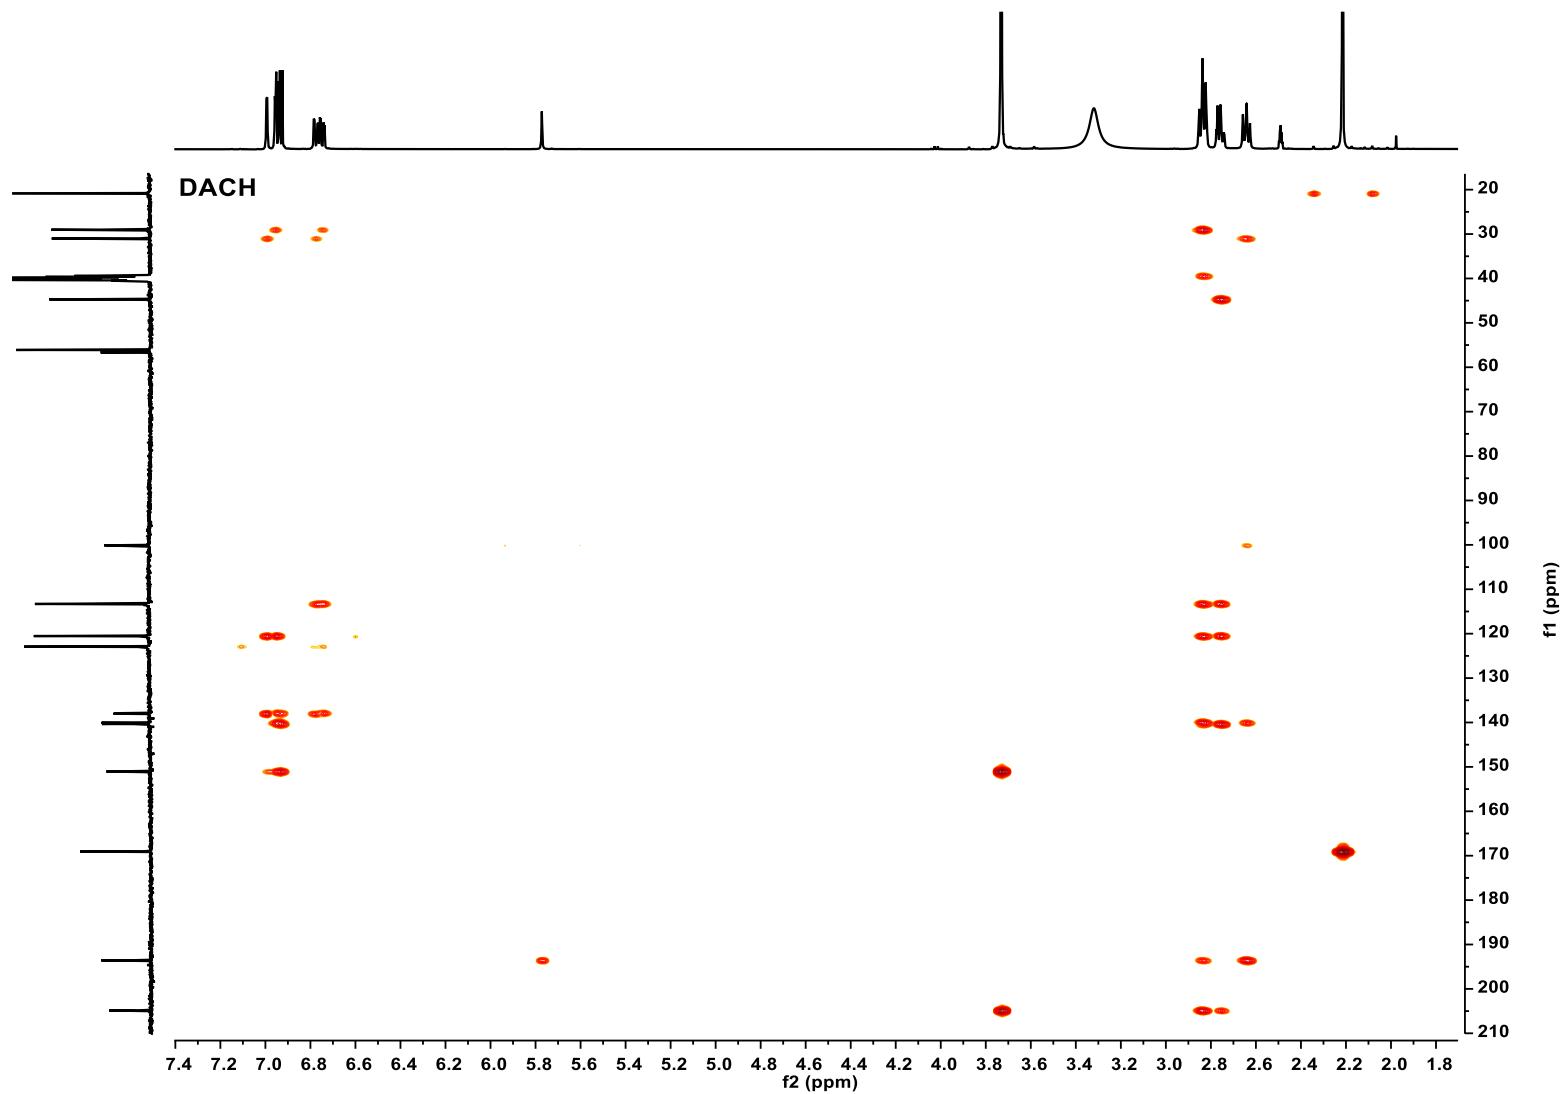

Figure S8. 500 MHz HMBC NMR spectrum of hydrogenated diacetyl-curcumin.

DiMeOC

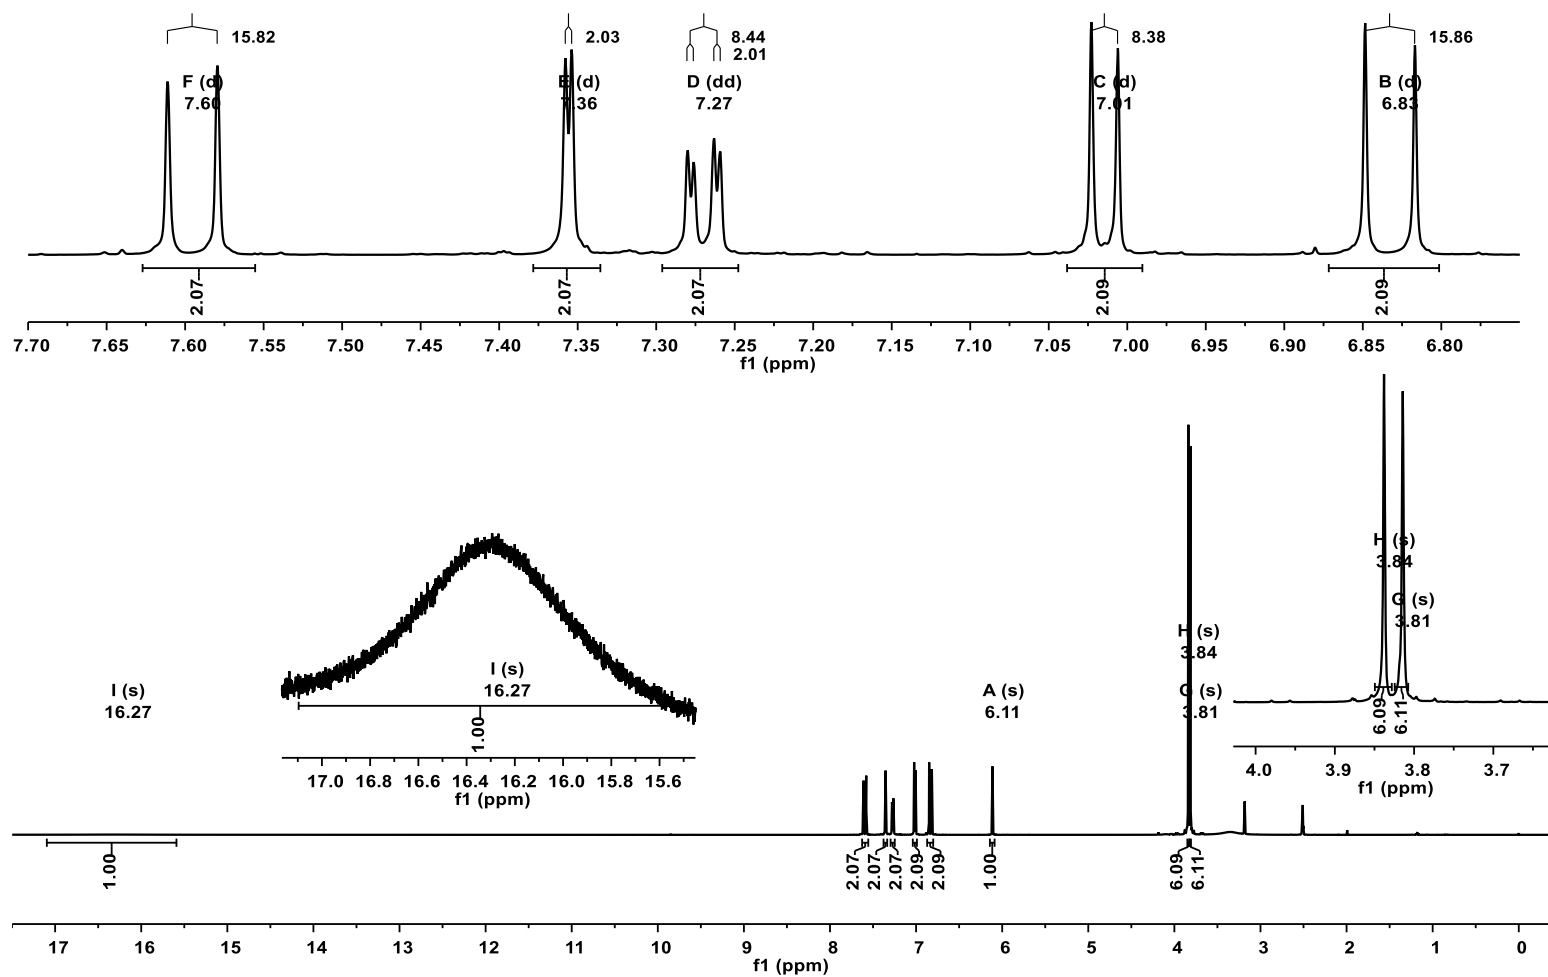

Figure S9. 500 MHz <sup>1</sup>H NMR spectrum of dimethoxy-curcumin.

DiMeOC

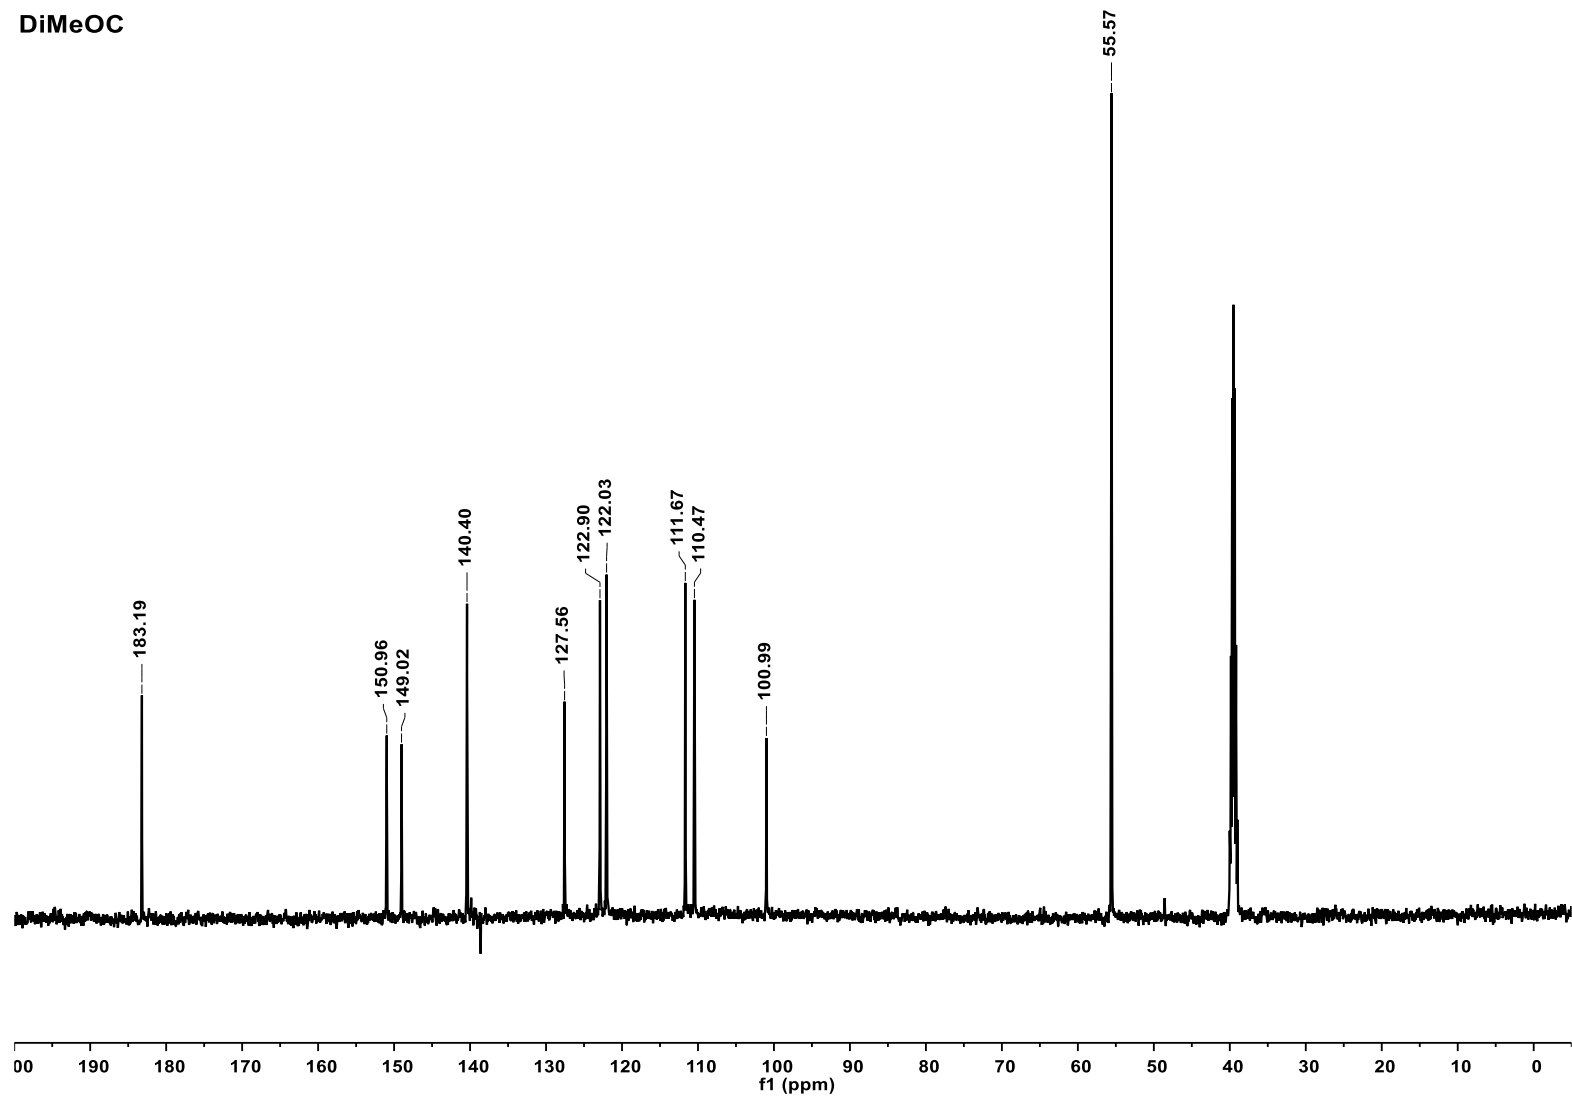

Figure S10. 125 MHz  $^{13}\text{C}$  NMR spectrum of dimethoxy-curcumin.

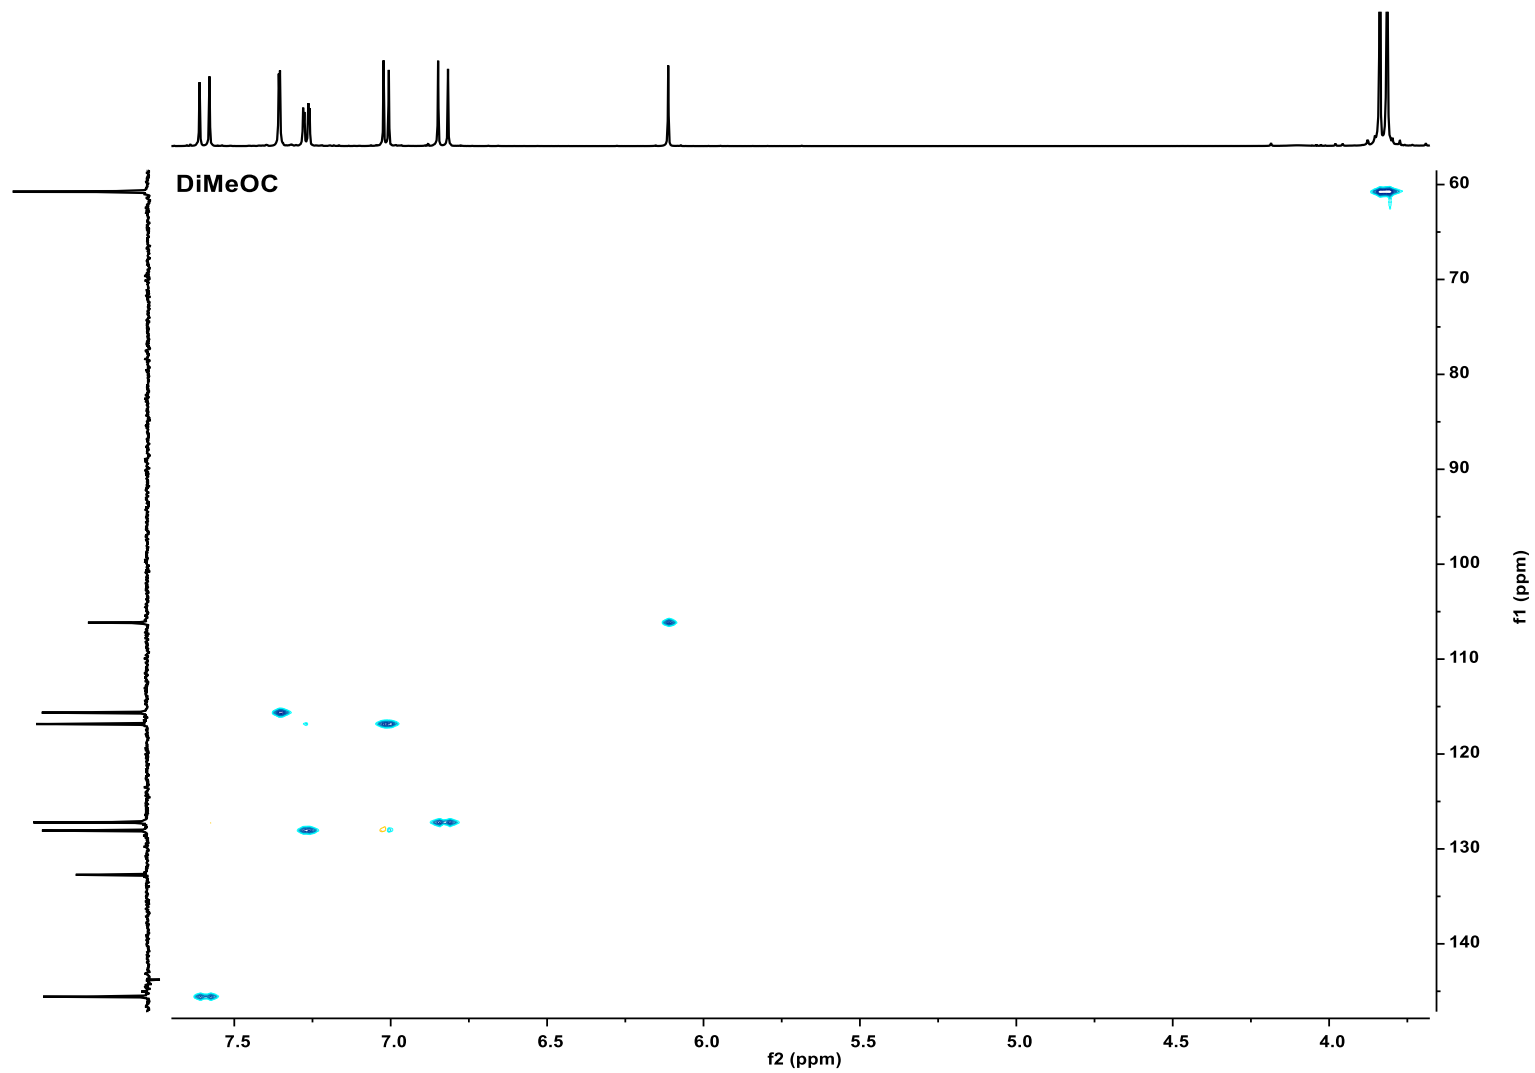

Figure S11. 500 MHz HSQC NMR spectrum of dimethoxy-curcumin.

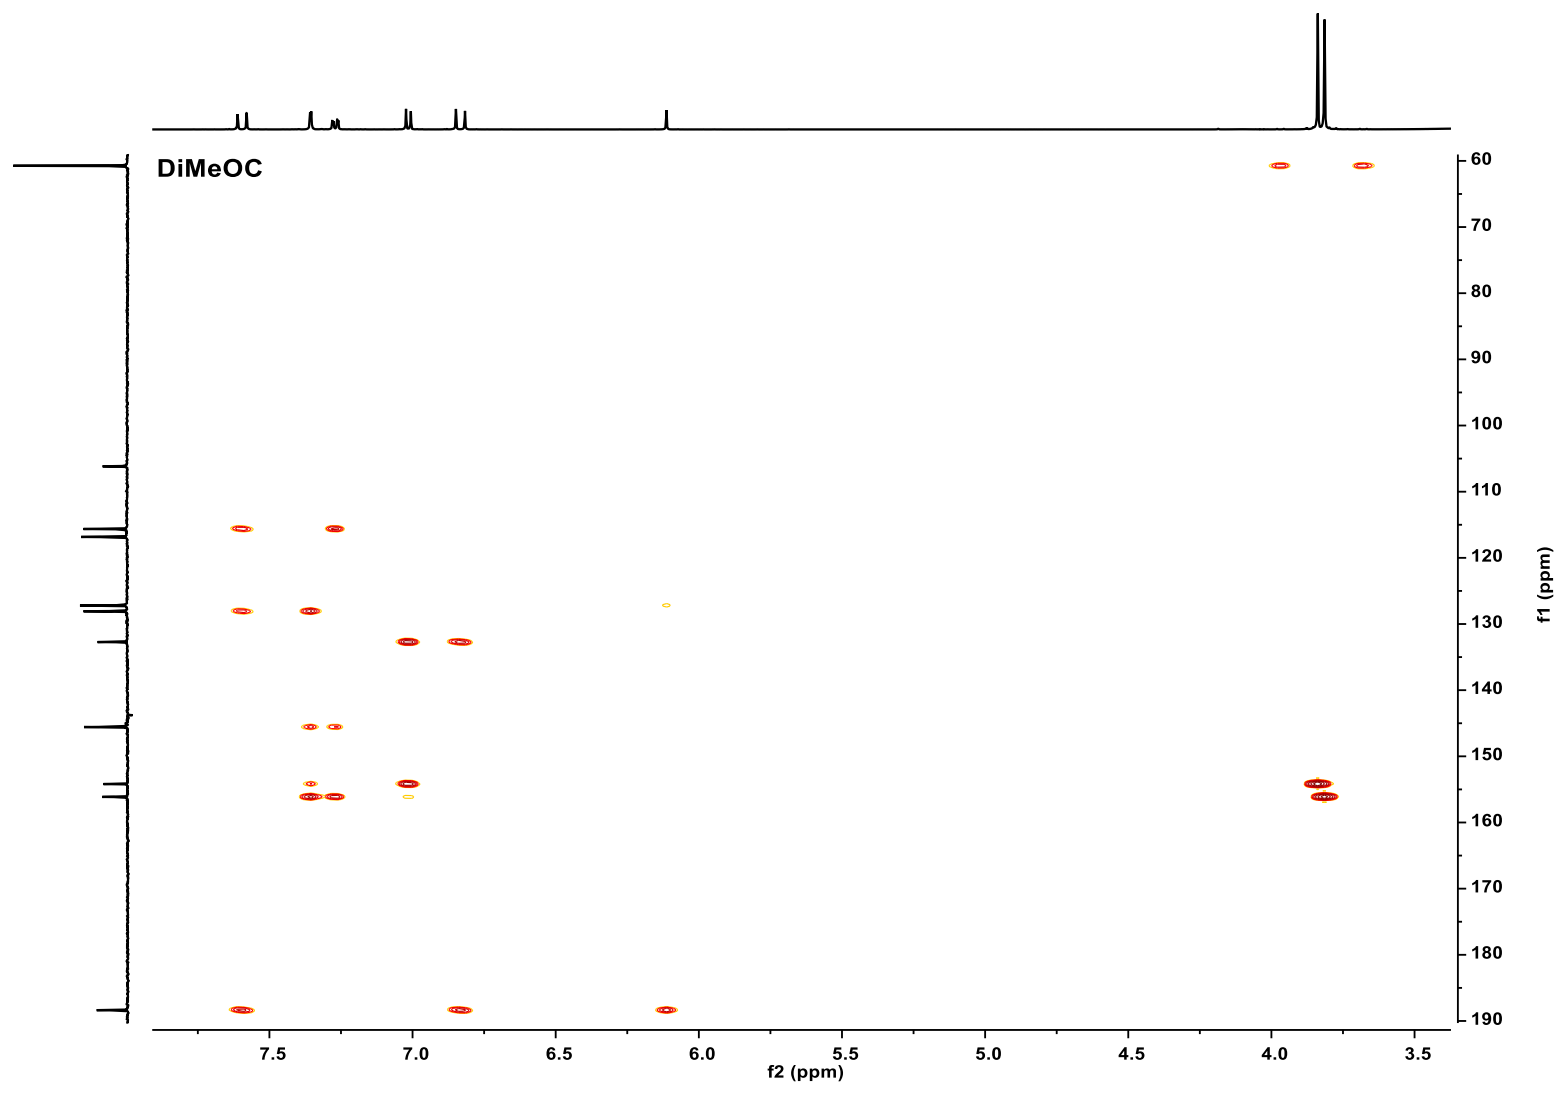

Figure S12. 500 MHz HMBC NMR spectrum of dimethoxy-curcumin.

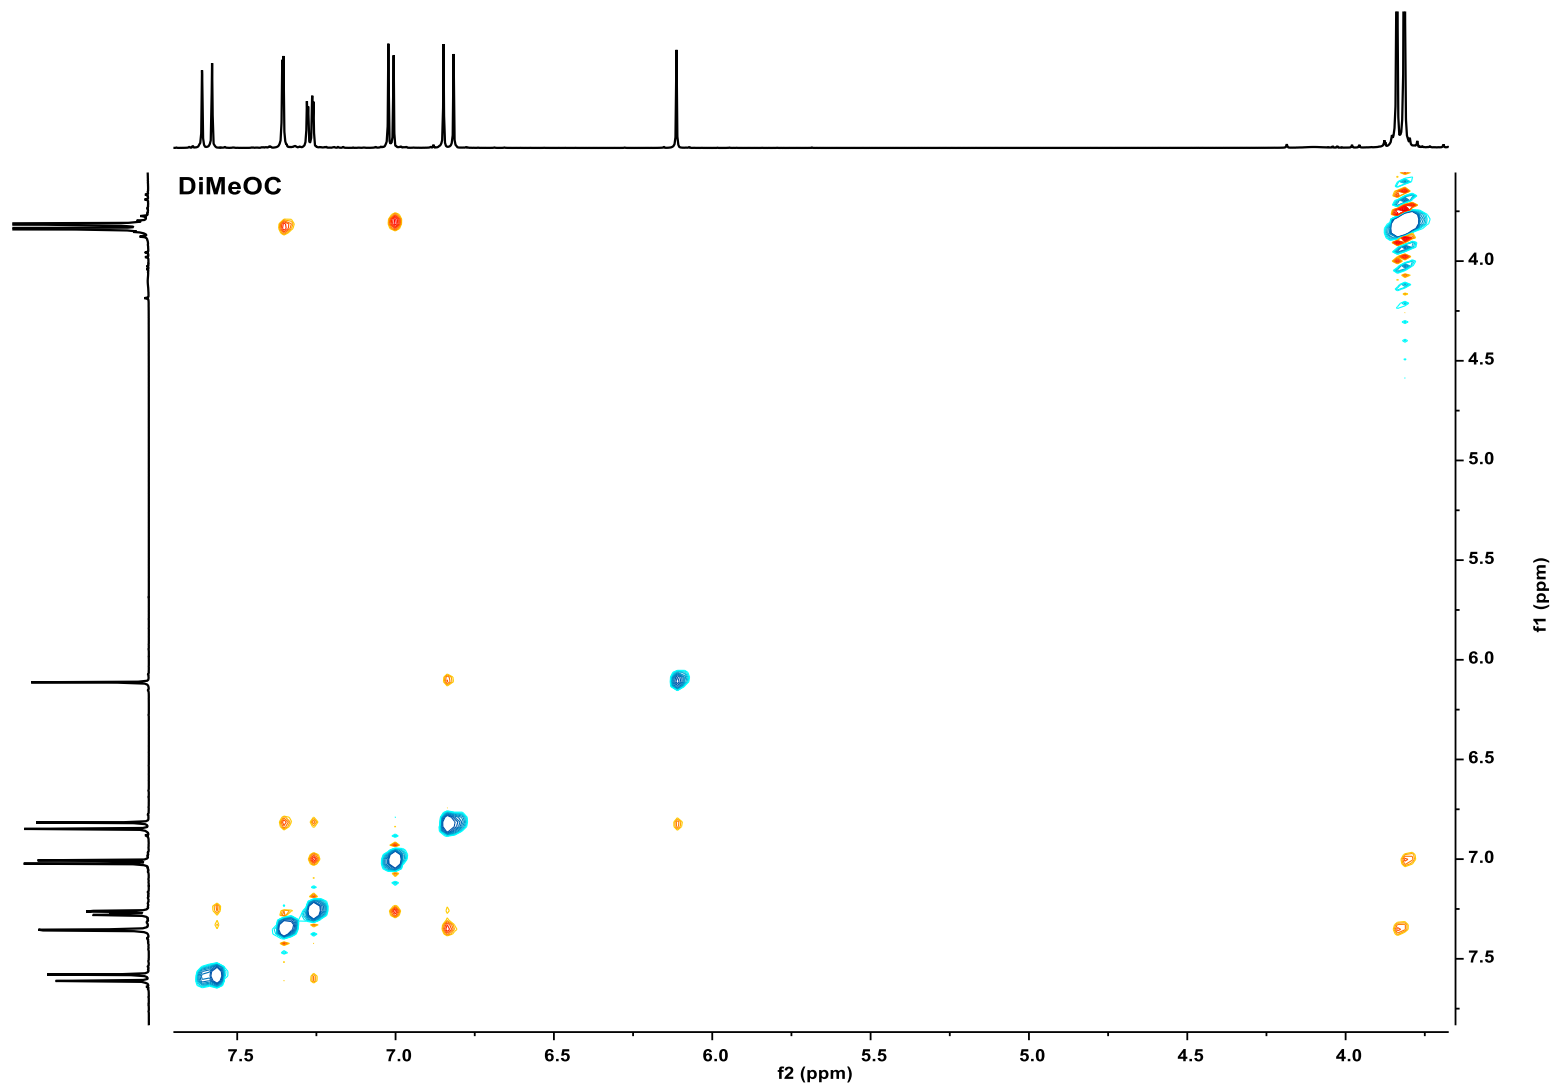

Figure S13. 500 MHz ROESY NMR spectrum of dimethoxy-curcumin.

DiBncOC

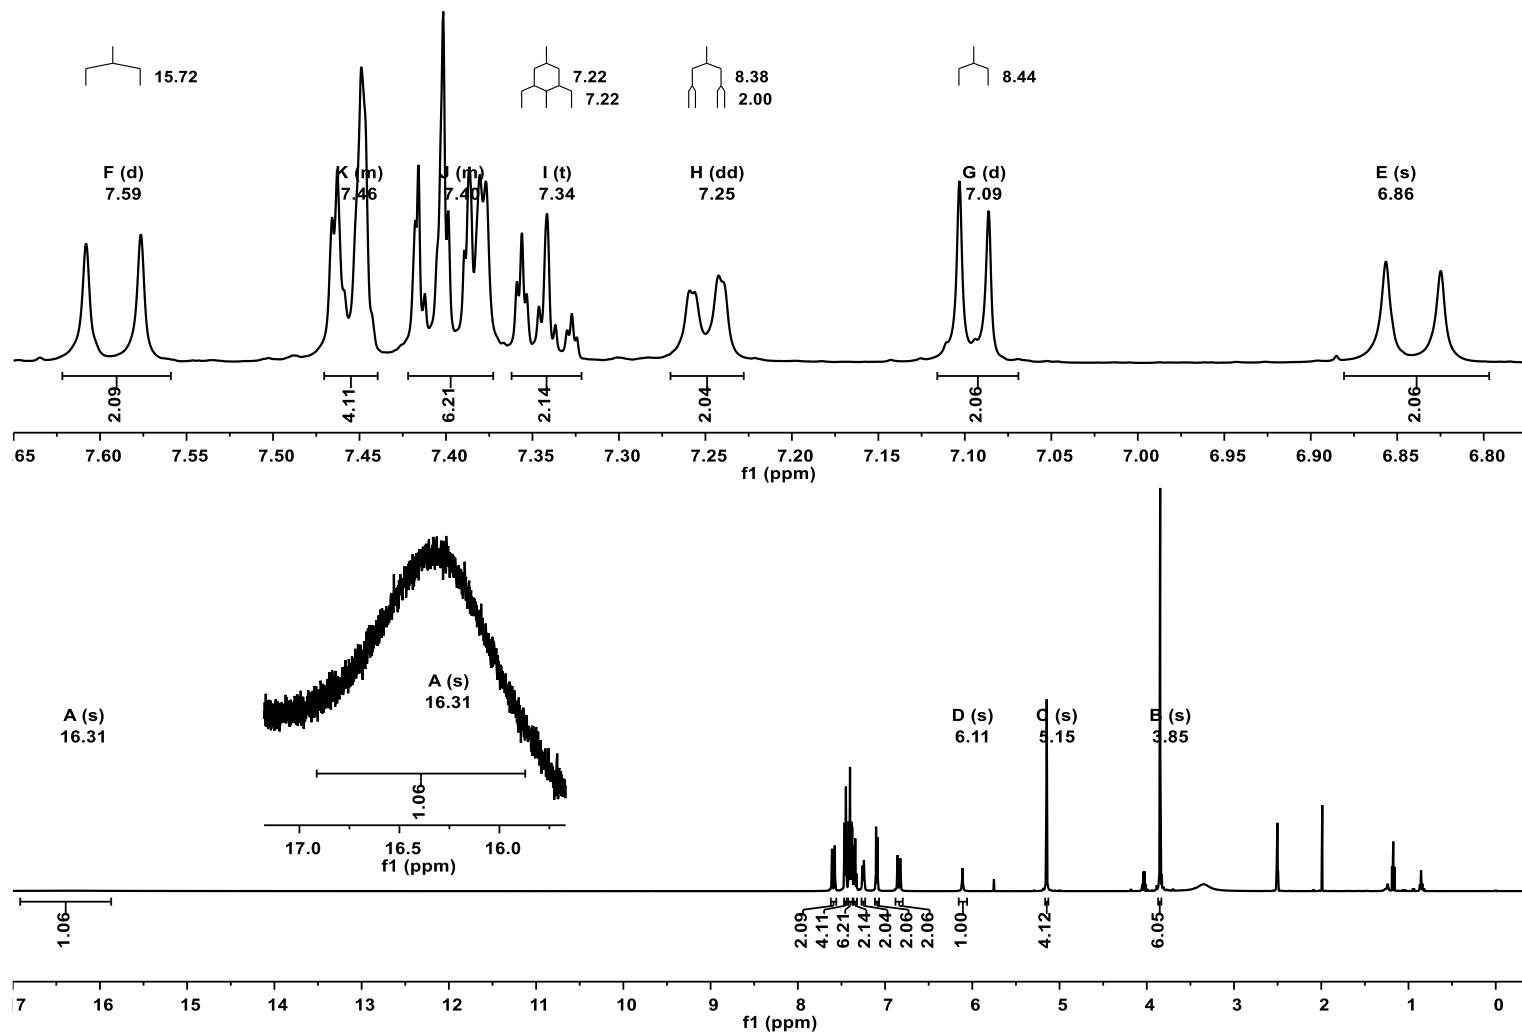

Figure S14. 500 MHz <sup>1</sup>H NMR spectrum of dibenzyl-curcumin.



DiBncOC

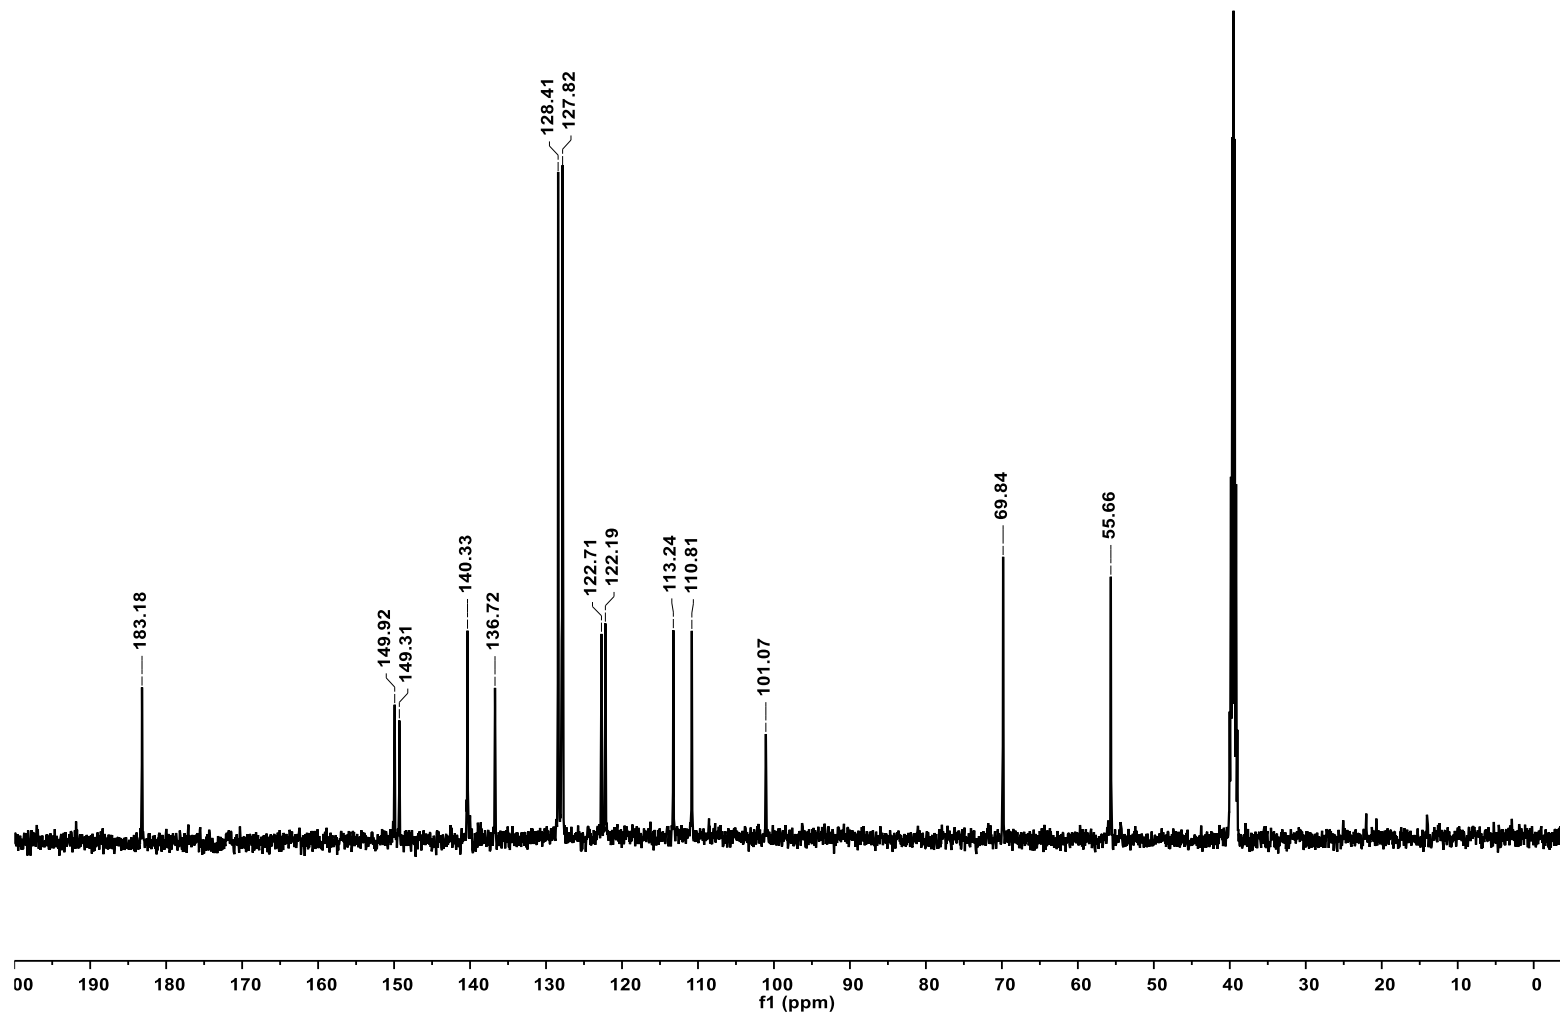

Figure S15. 125 MHz  $^{13}\text{C}$  NMR spectrum of dibenzyl-curcumin.

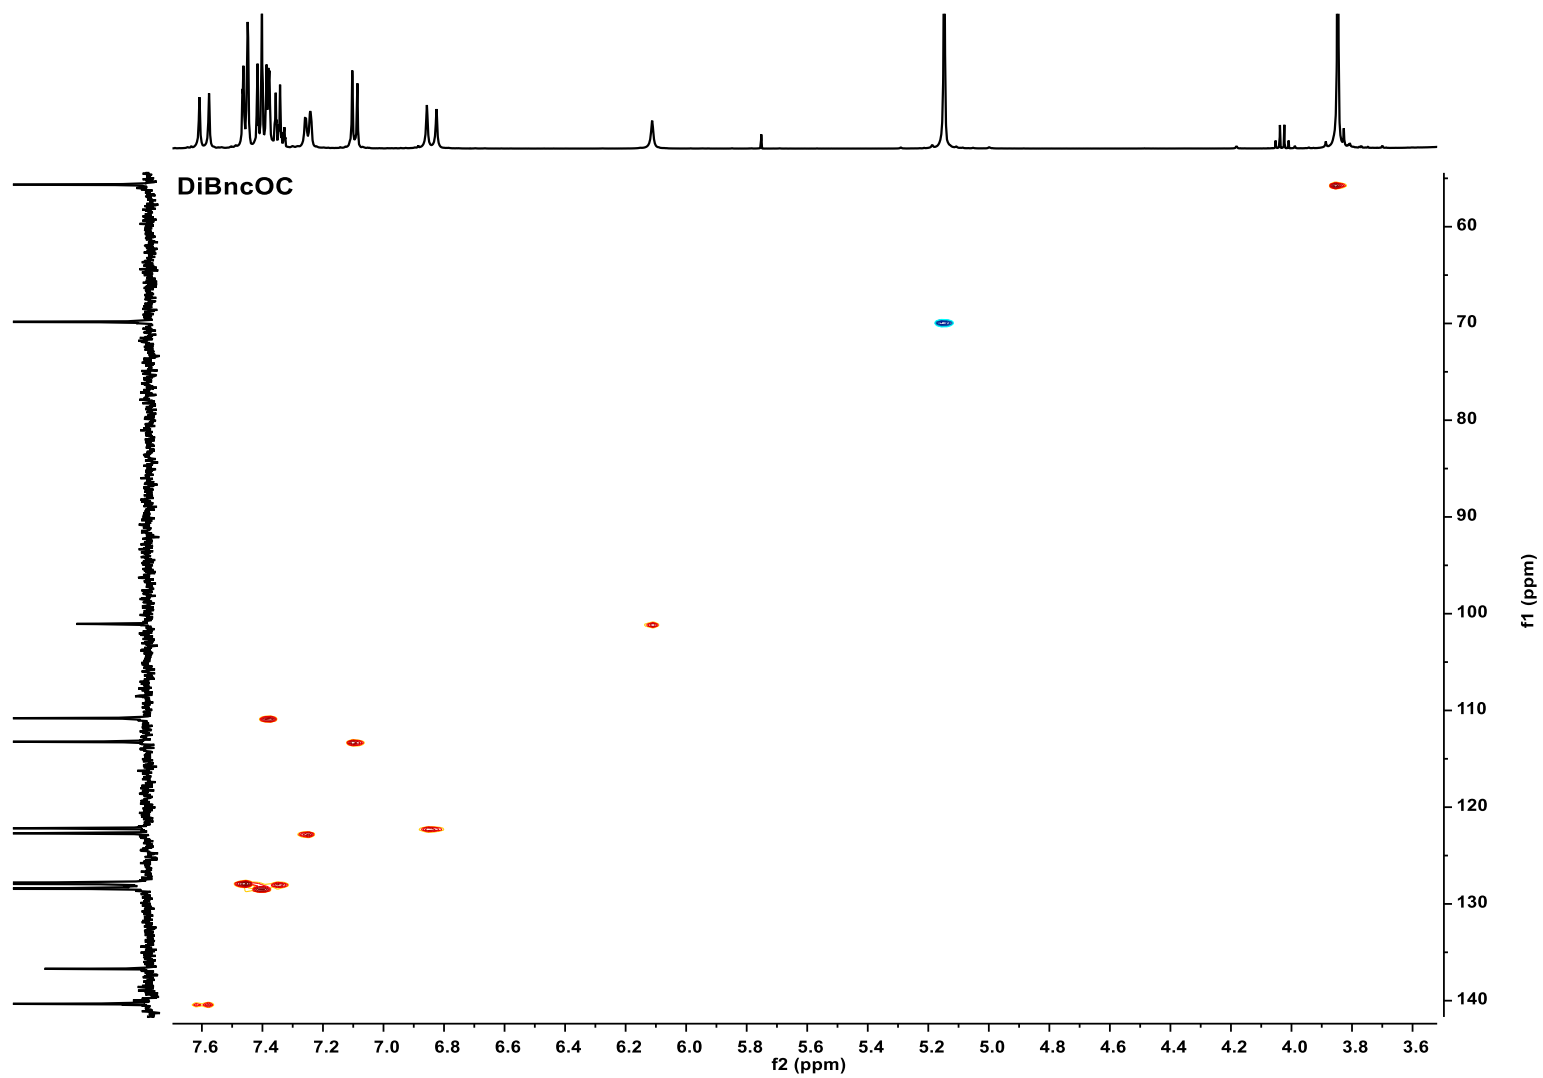

Figure S16. 500 MHz HSQC NMR of dibenzyl-curcumin.

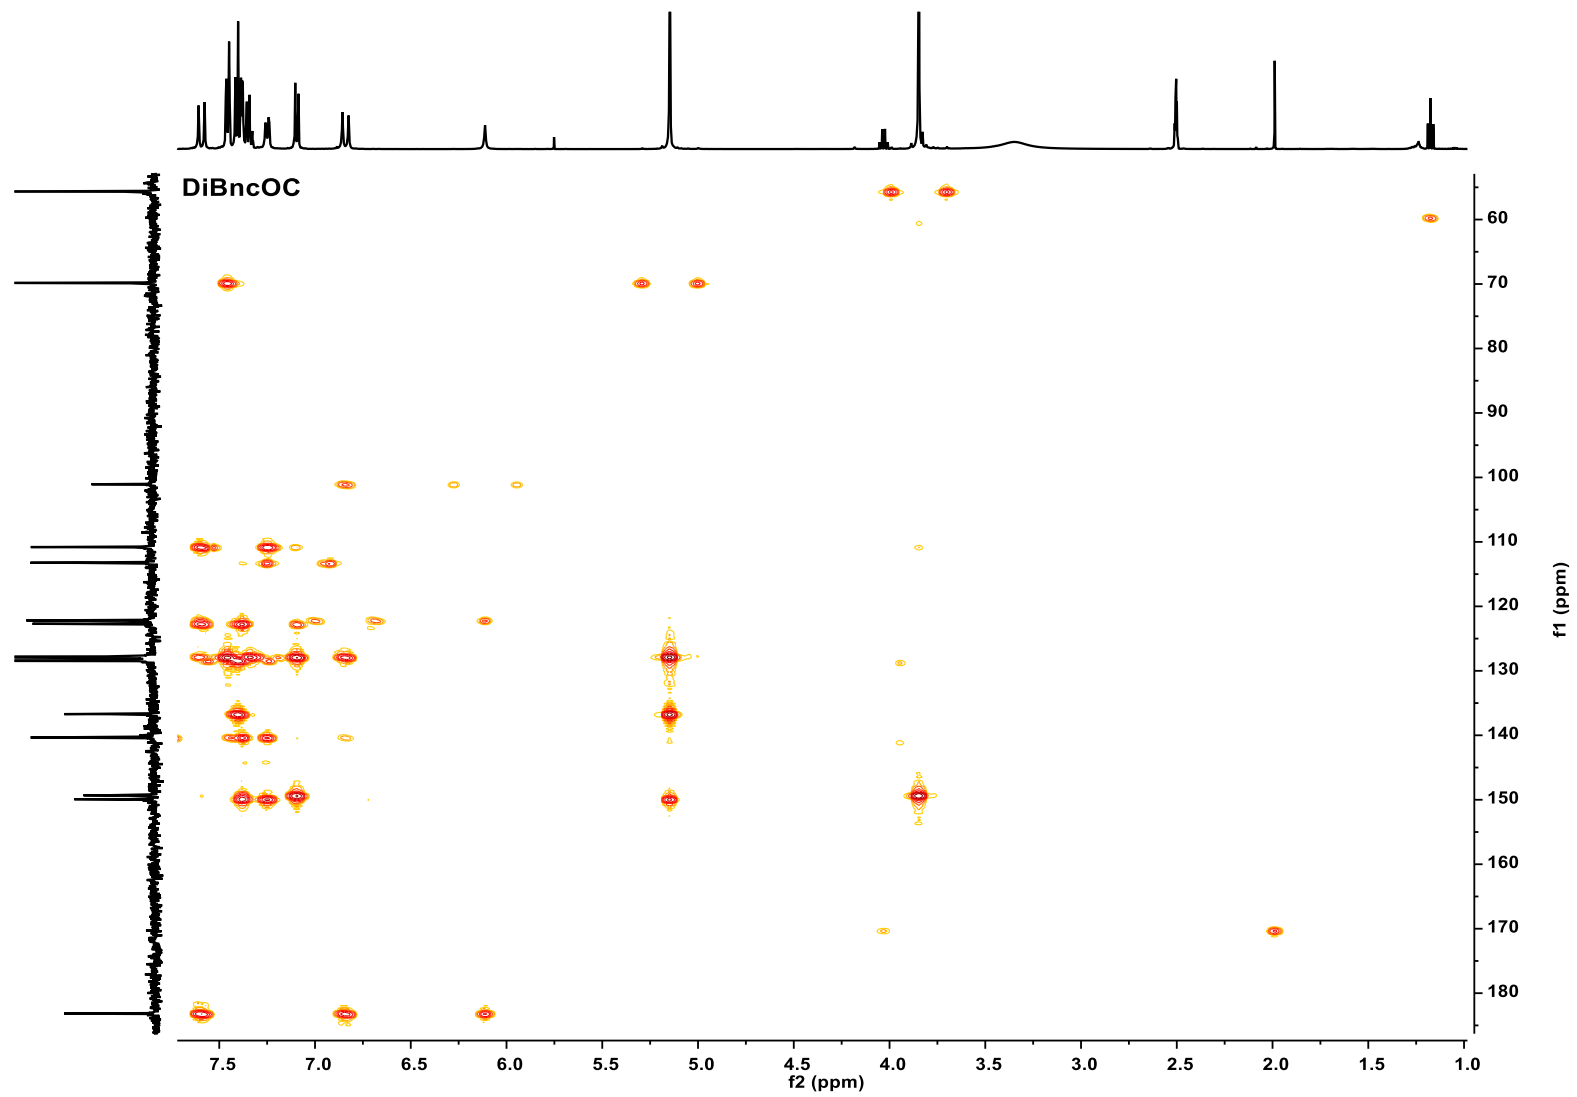

Figura S17. 500 MHz HMBC NMR of dibenzyl-curcumin.

PhCurcu

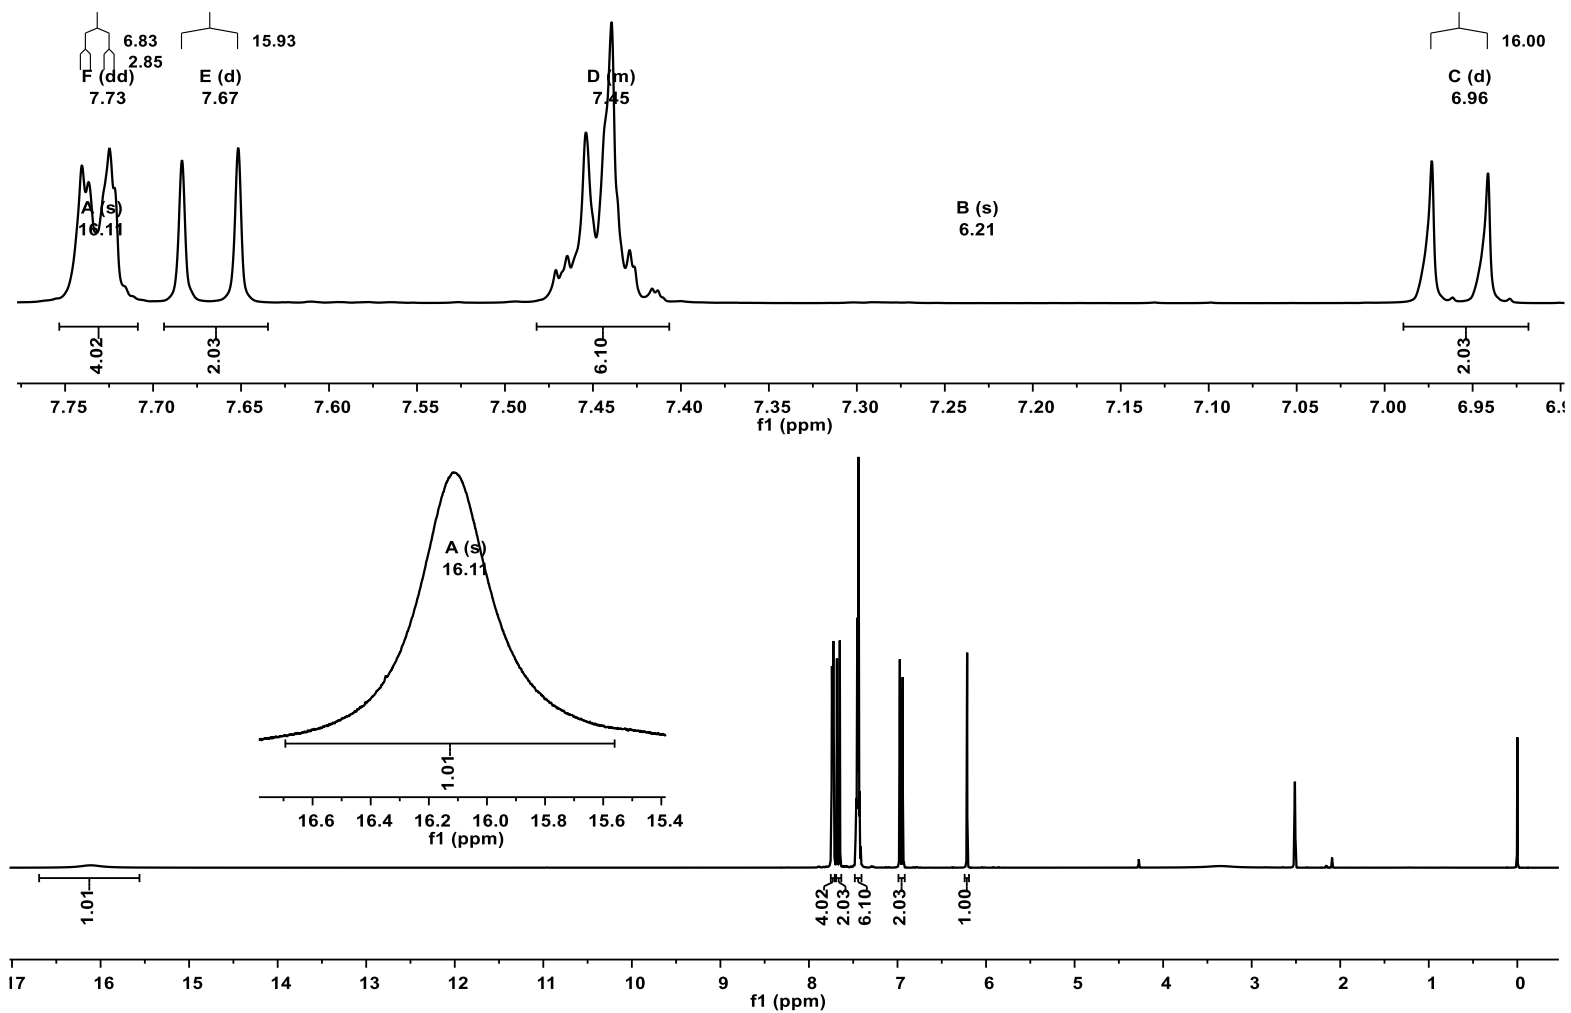

Figure S18. 500 MHz <sup>1</sup>H NMR spectrum of diphenyl-curcumin.

PhCurcu

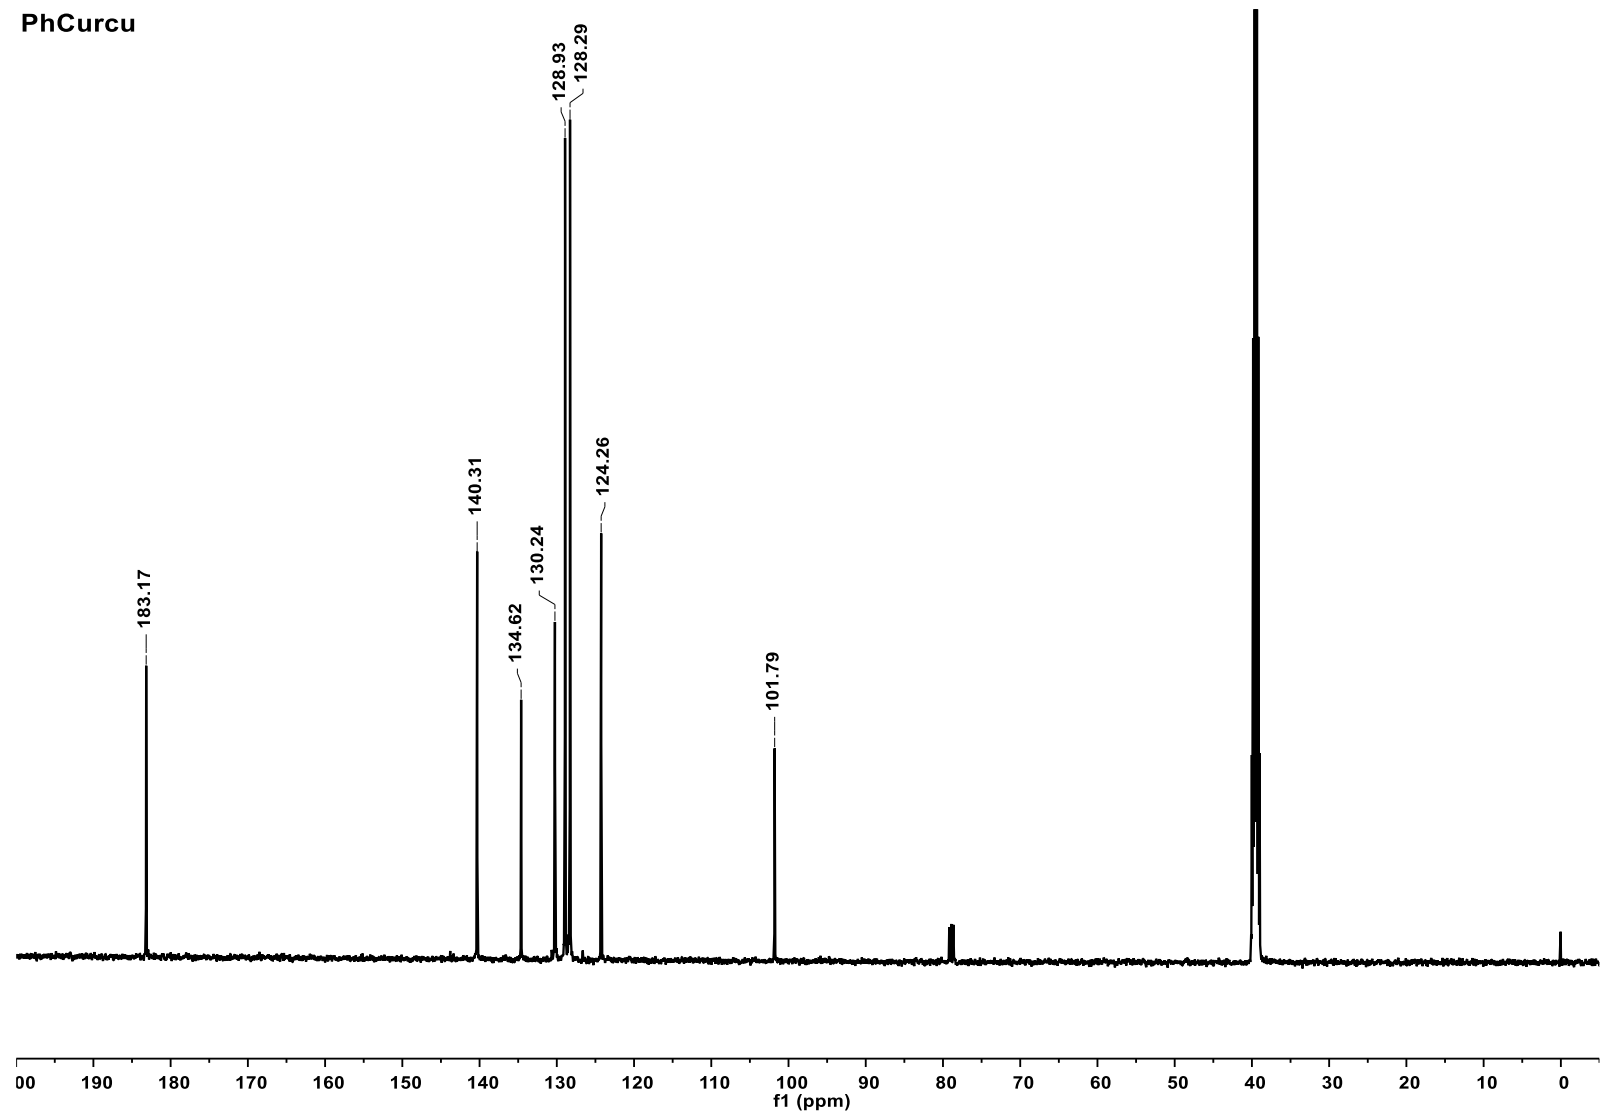

Figure S19. 125 MHz  $^{13}\text{C}$  NMR spectrum of diphenyl-curcumin.

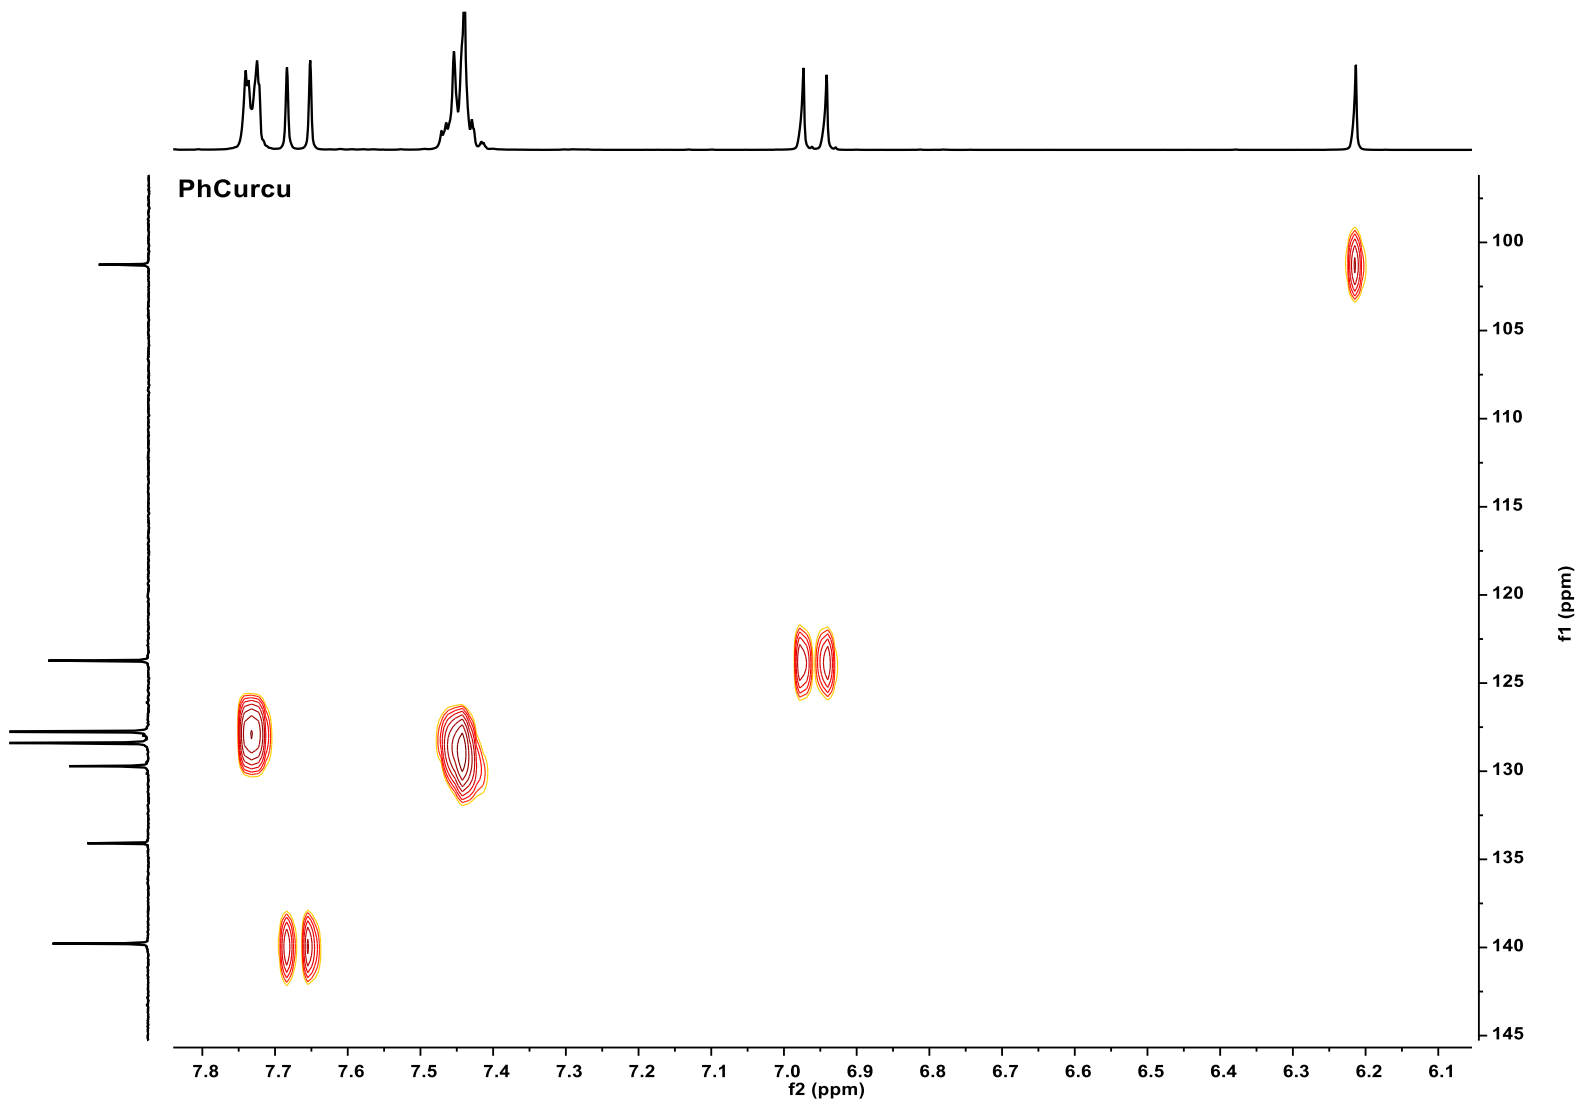

Figure S20. 500 MHz HSQC NMR of diphenyl-curcumin.

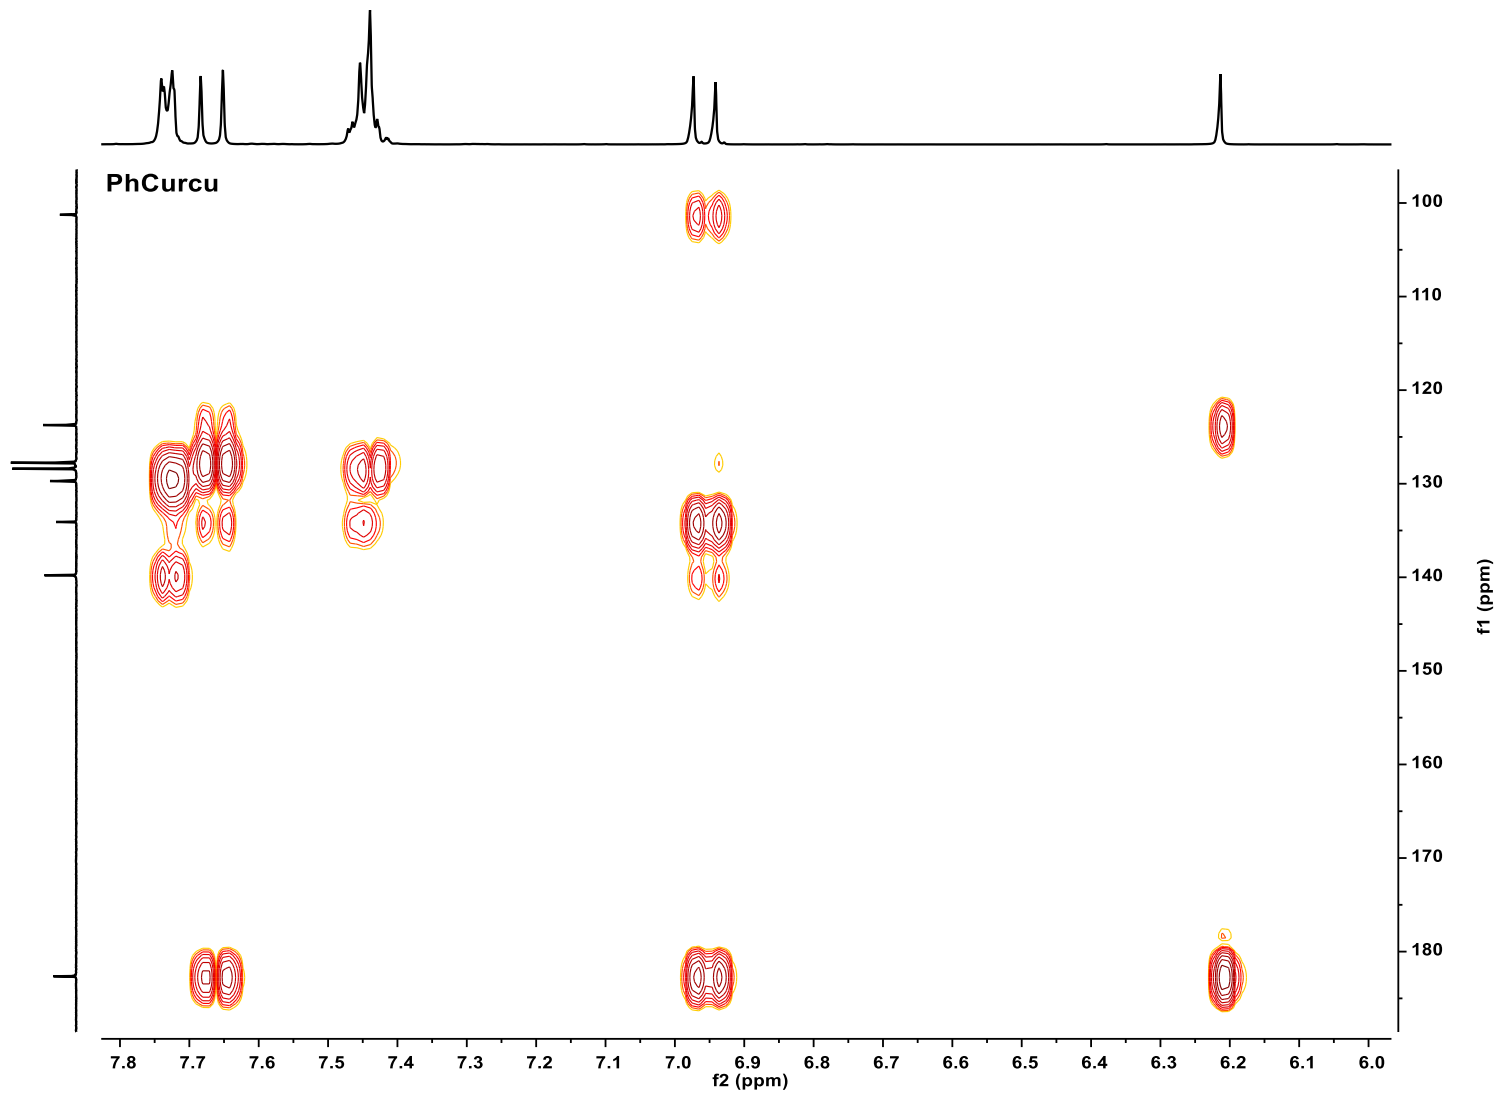

Figure S21. 500 MHz HMBC NMR of diphenyl-curcumin.

DAC-Cu

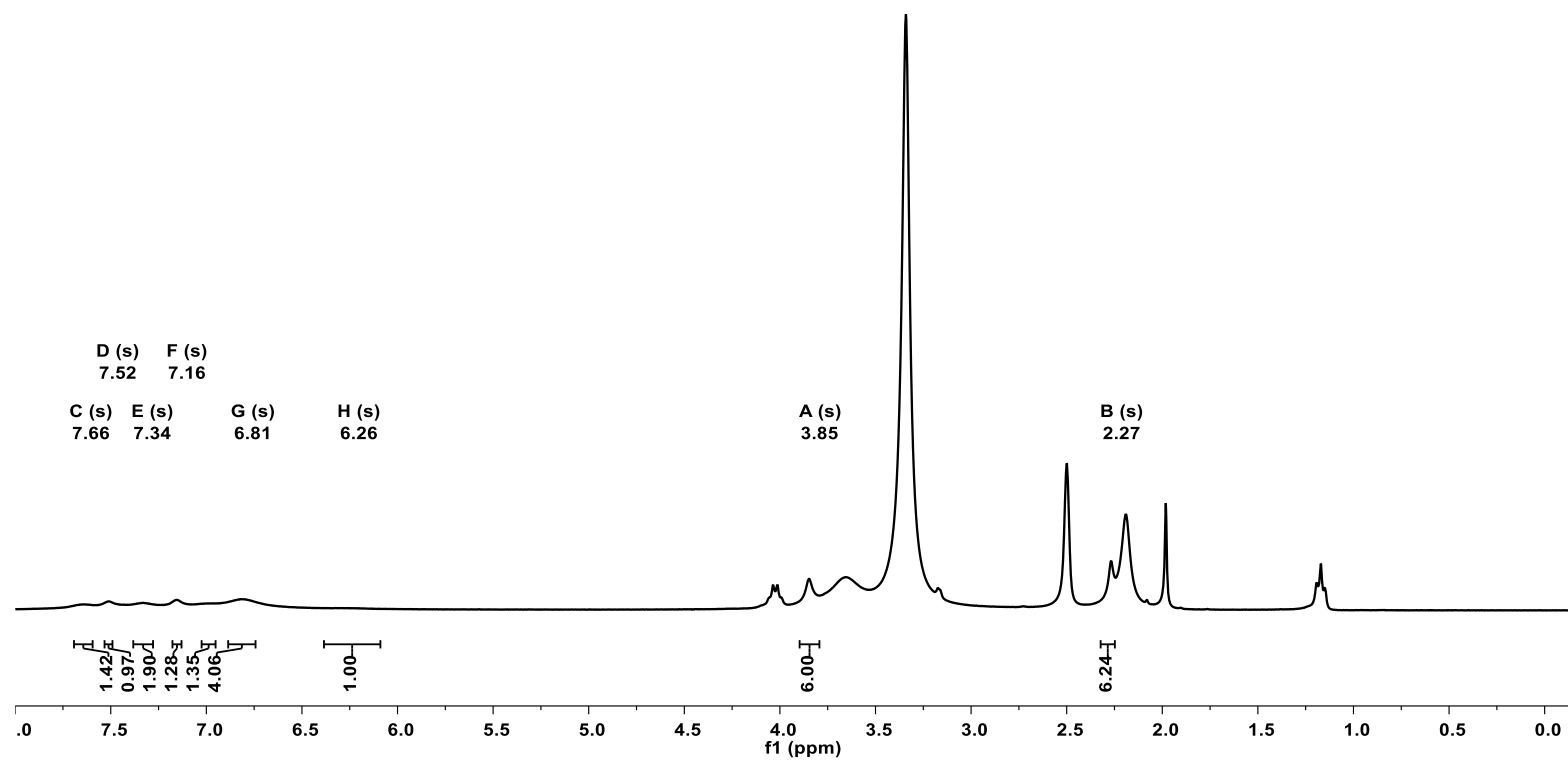

Figure S22. 500 MHz <sup>1</sup>H NMR spectrum of diacetyl-curcumin with Cu (II).



DACH-Cu

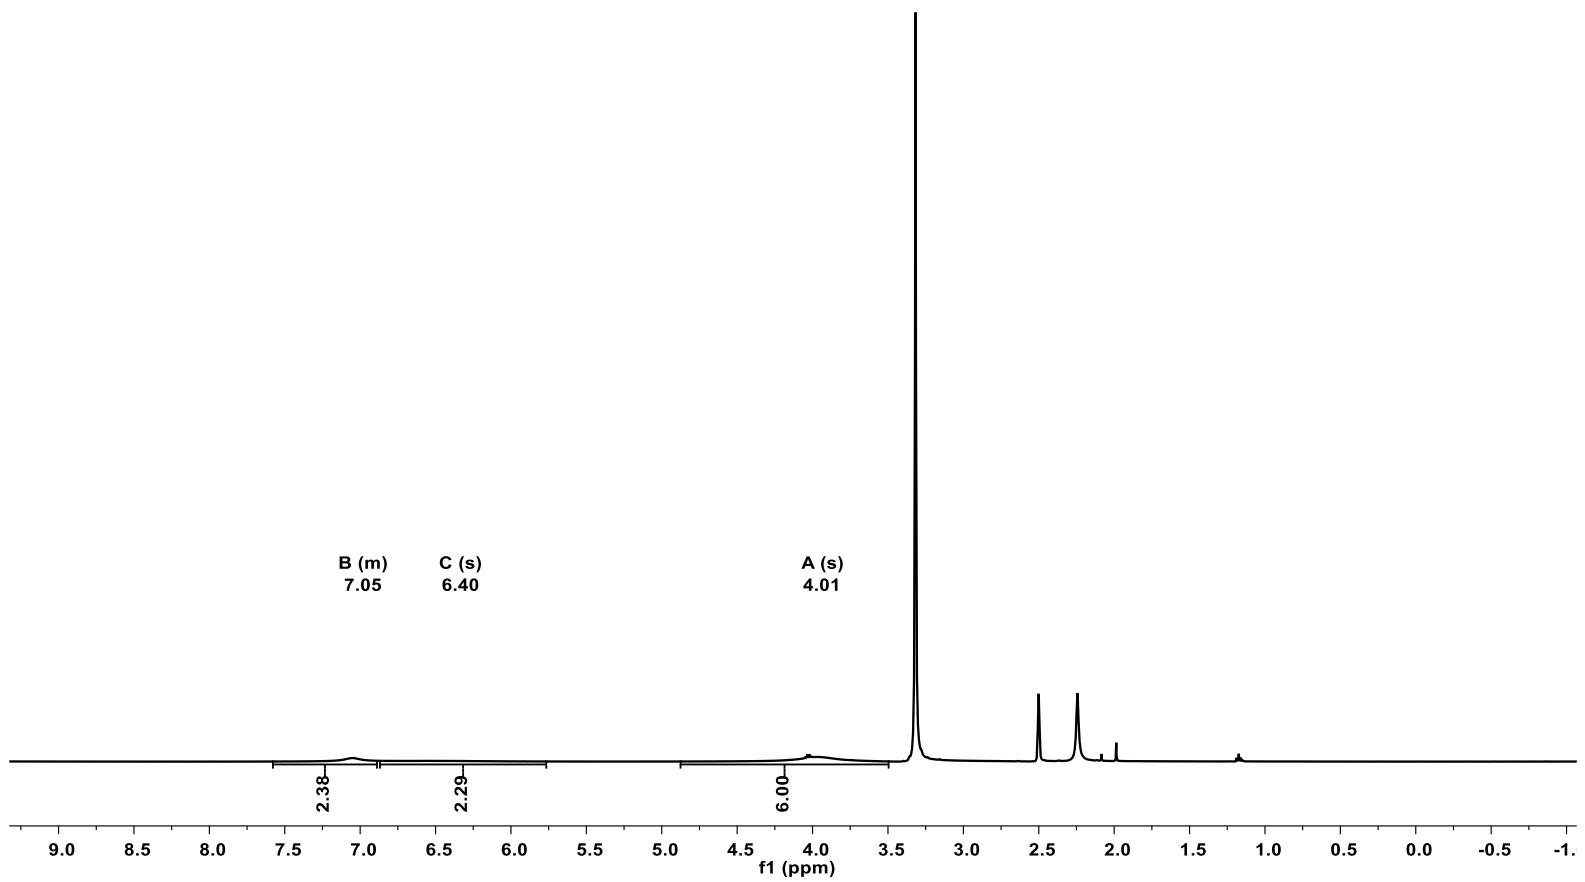

Figure S23. 500 MHz  $^1\text{H}$  NMR spectrum of hydrogenated diacetyl-curcumin with Cu (II).

DiMeOC-Cu

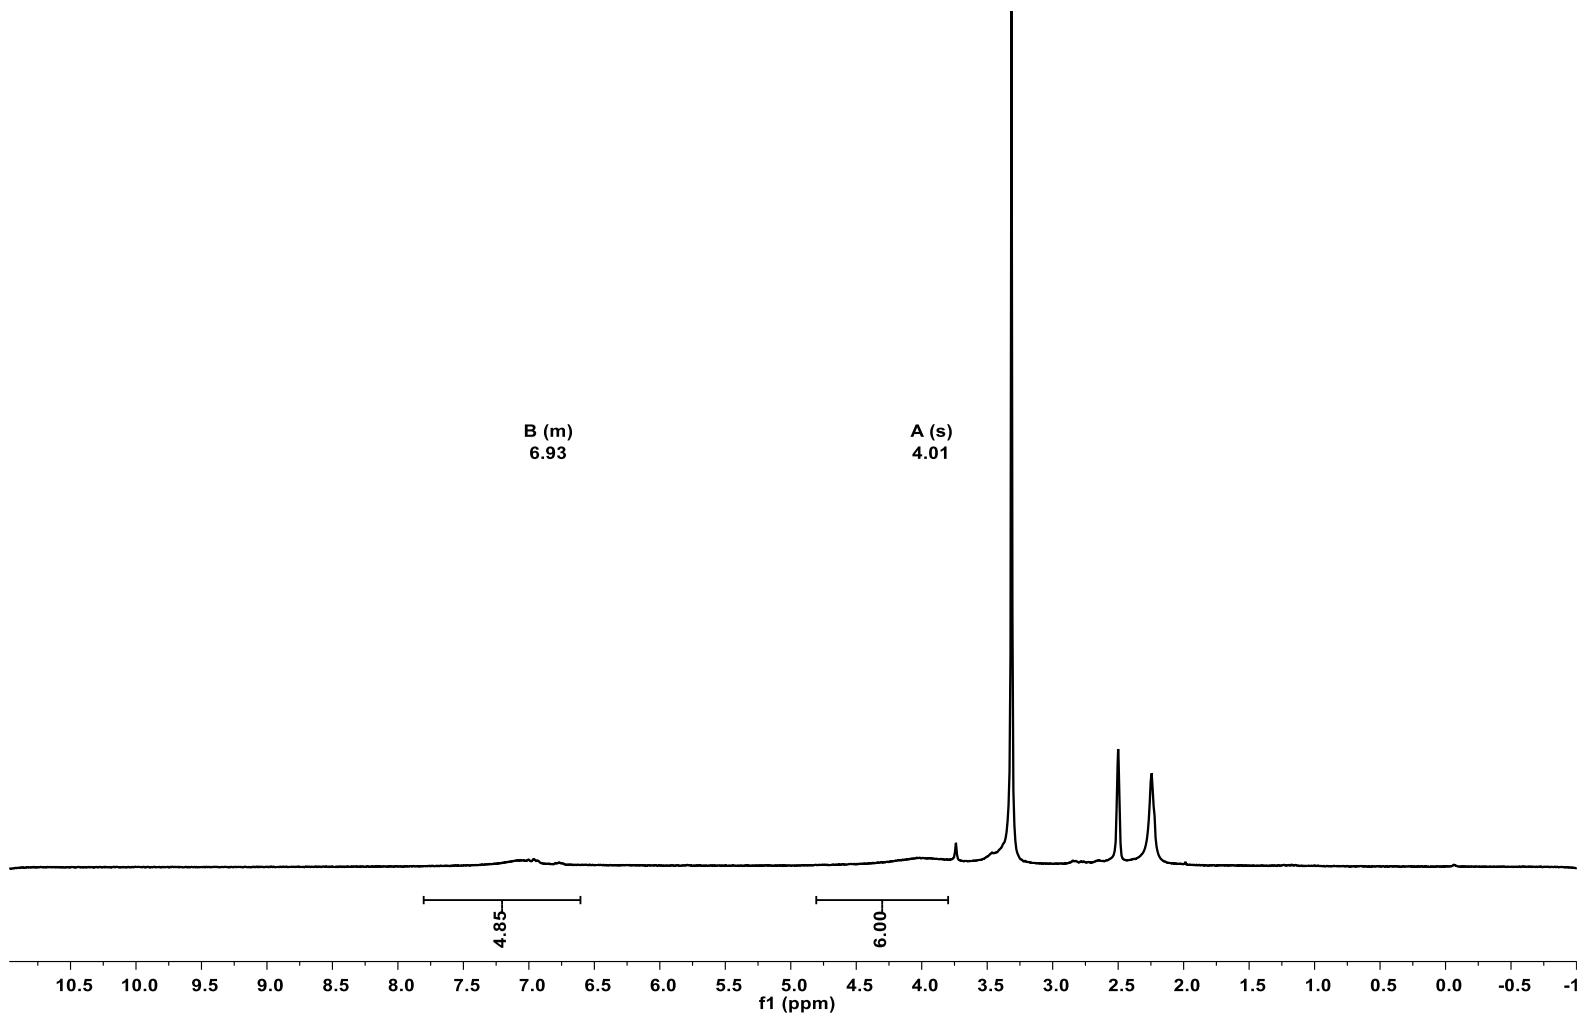

Figure S24. 500 MHz <sup>1</sup>H NMR spectrum of dimethoxy-curcumin with Cu (II).

DiBncOC-Cu

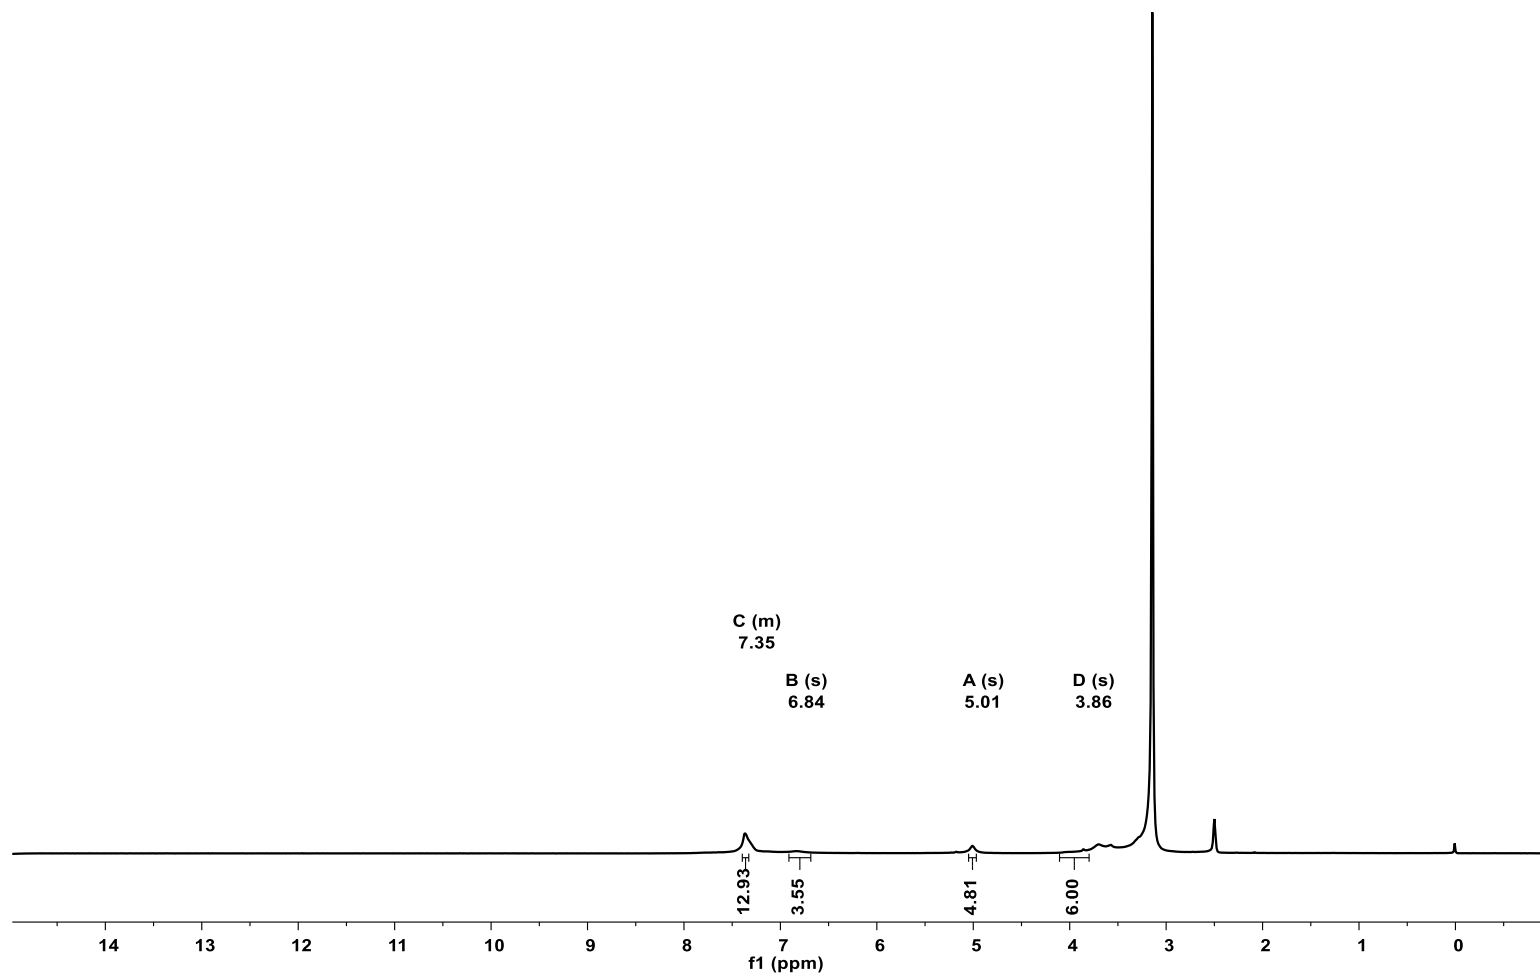

Figure S25. 500 MHz  $^1\text{H}$  NMR spectrum of dibenzyl-curcumin with Cu (II).

PhCurcu-Cu

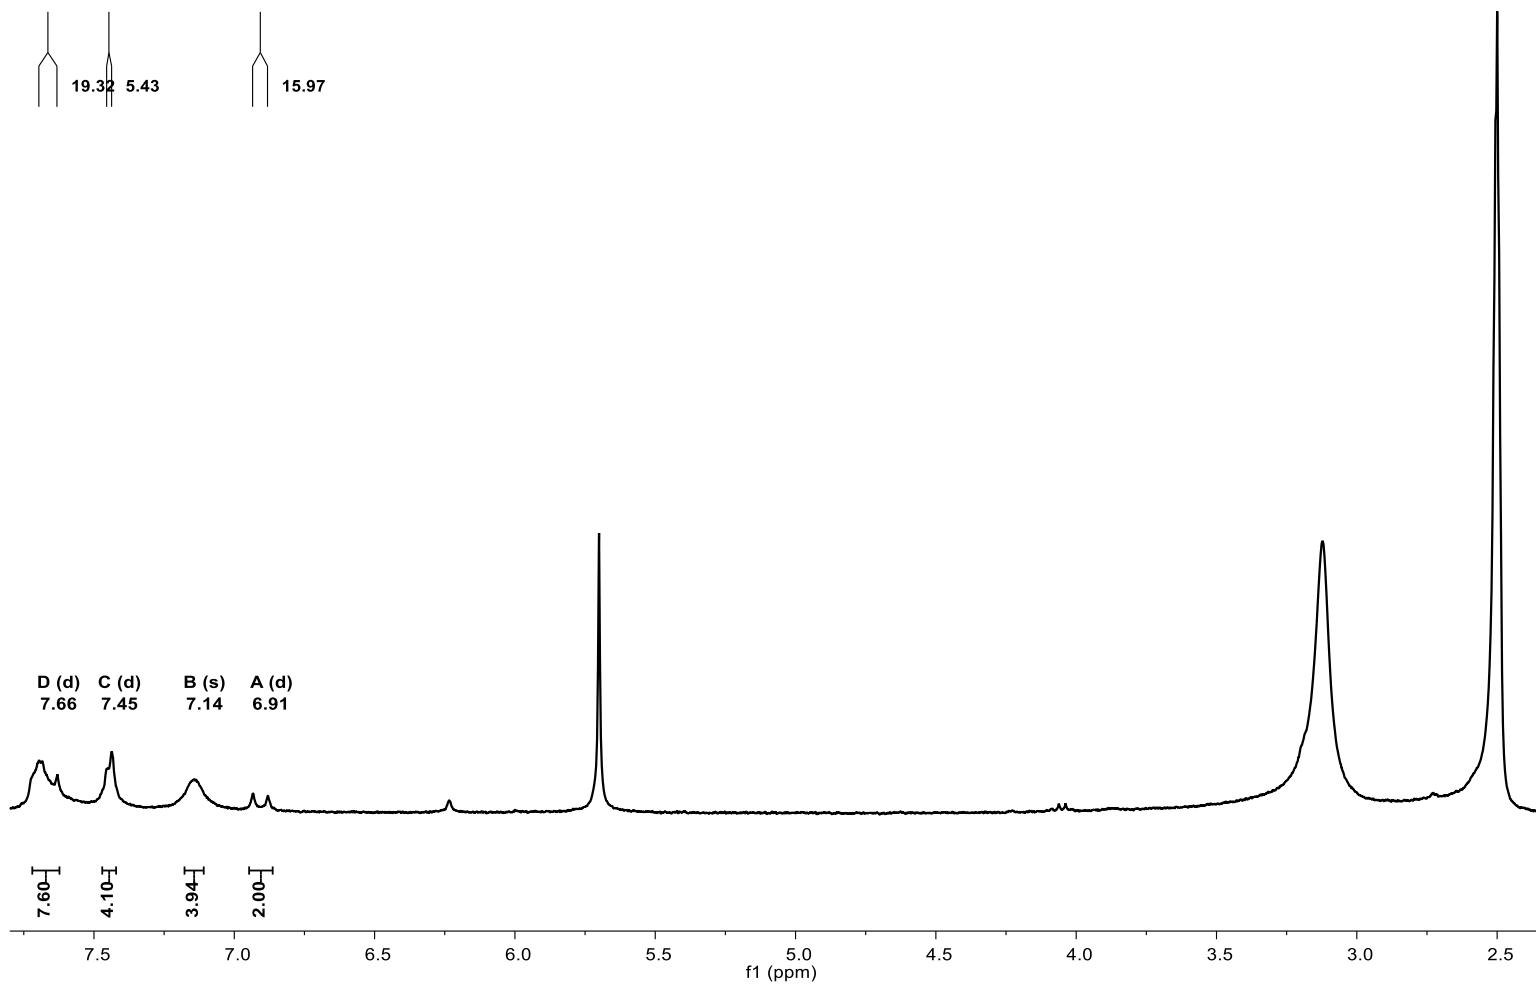

Figure S26. 500 MHz <sup>1</sup>H NMR spectrum of diphenyl-curcumin with Cu (II).

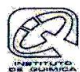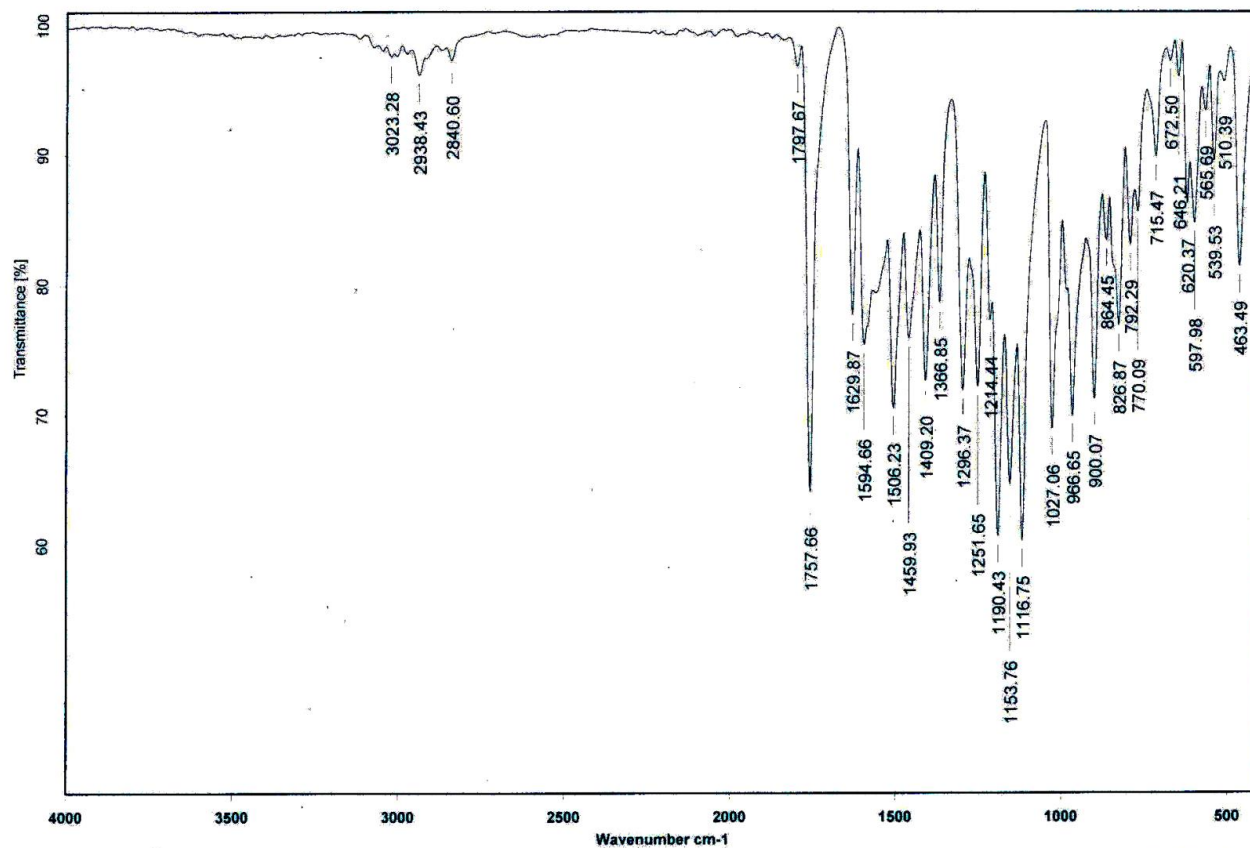

C:\INFRARROJO\AIR-LEP-IQUI-006\_16\DrREnriquez\1124.0 Dr.R.Enriquez DAC KBr/Pastilla RPI 10/06/2016

Figure S27. IR Spectrum of diacetyl-curcumin.

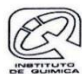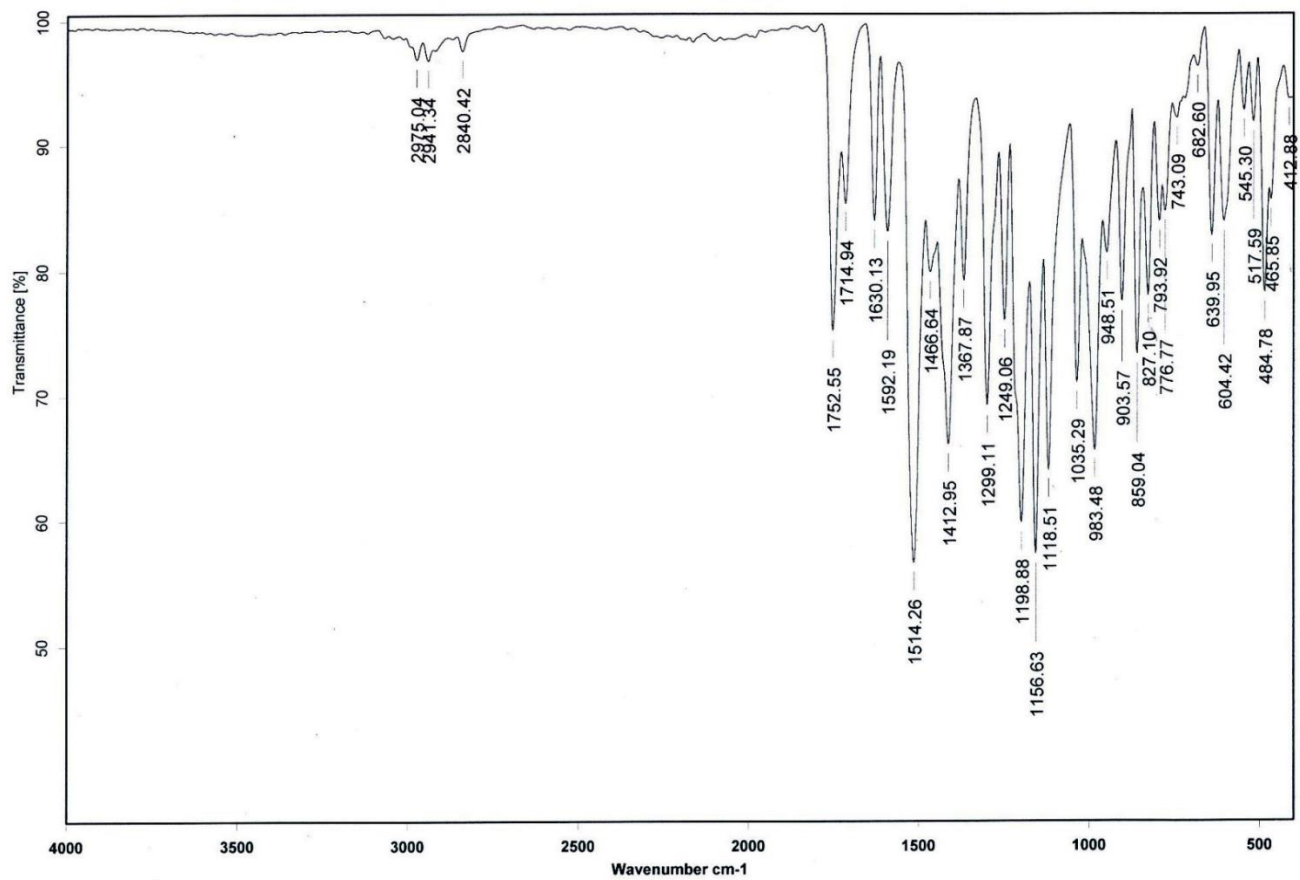

C:\Infrarrojo\AIR-LEP-IQUI-005\_15\2503.0

Dr.R.Enriquez

CoDACCu(2) 1:1

KBr/Pastilla

RPM

13/11/2015

Figure S28. IR Spectrum of diacetyl-curcumin with Cu (II).

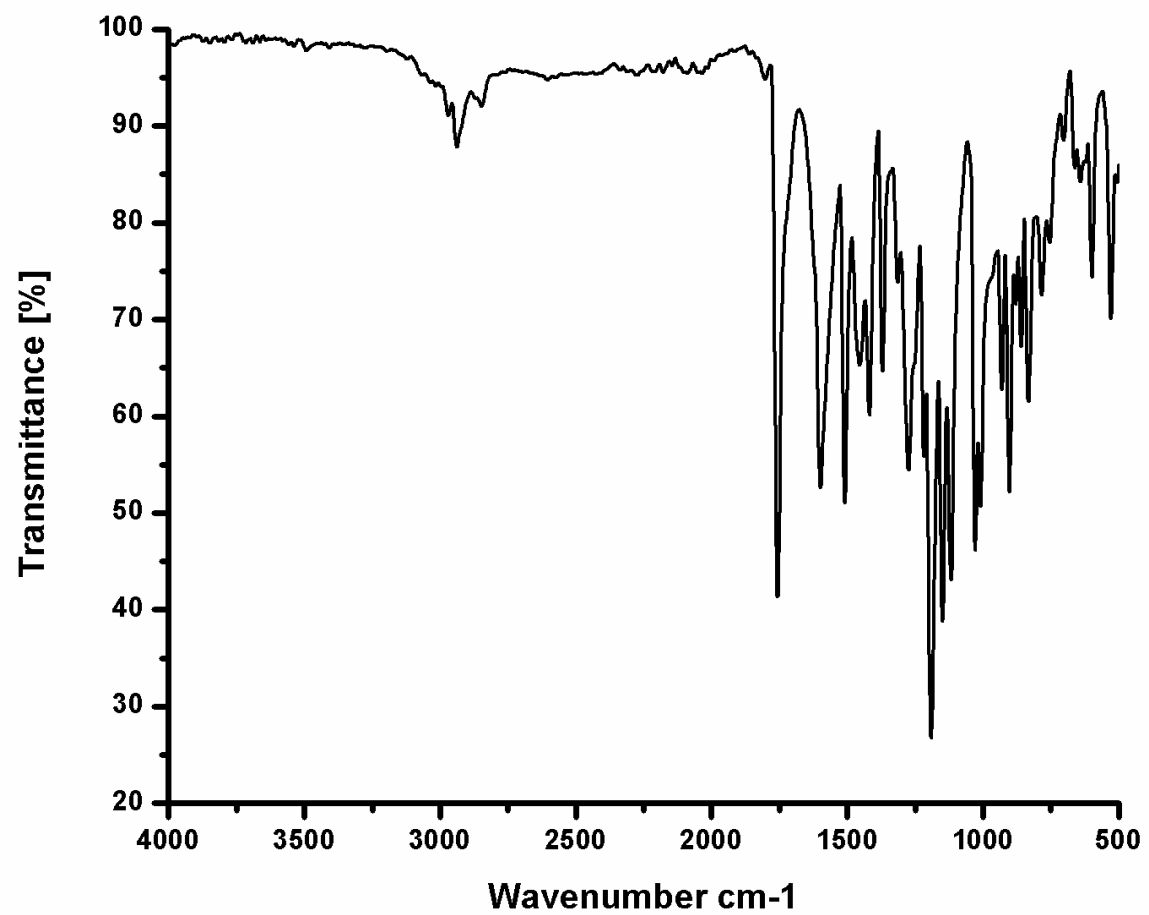

Figure S29. IR Spectrum of hydrogenated diacetyl-curcumin.

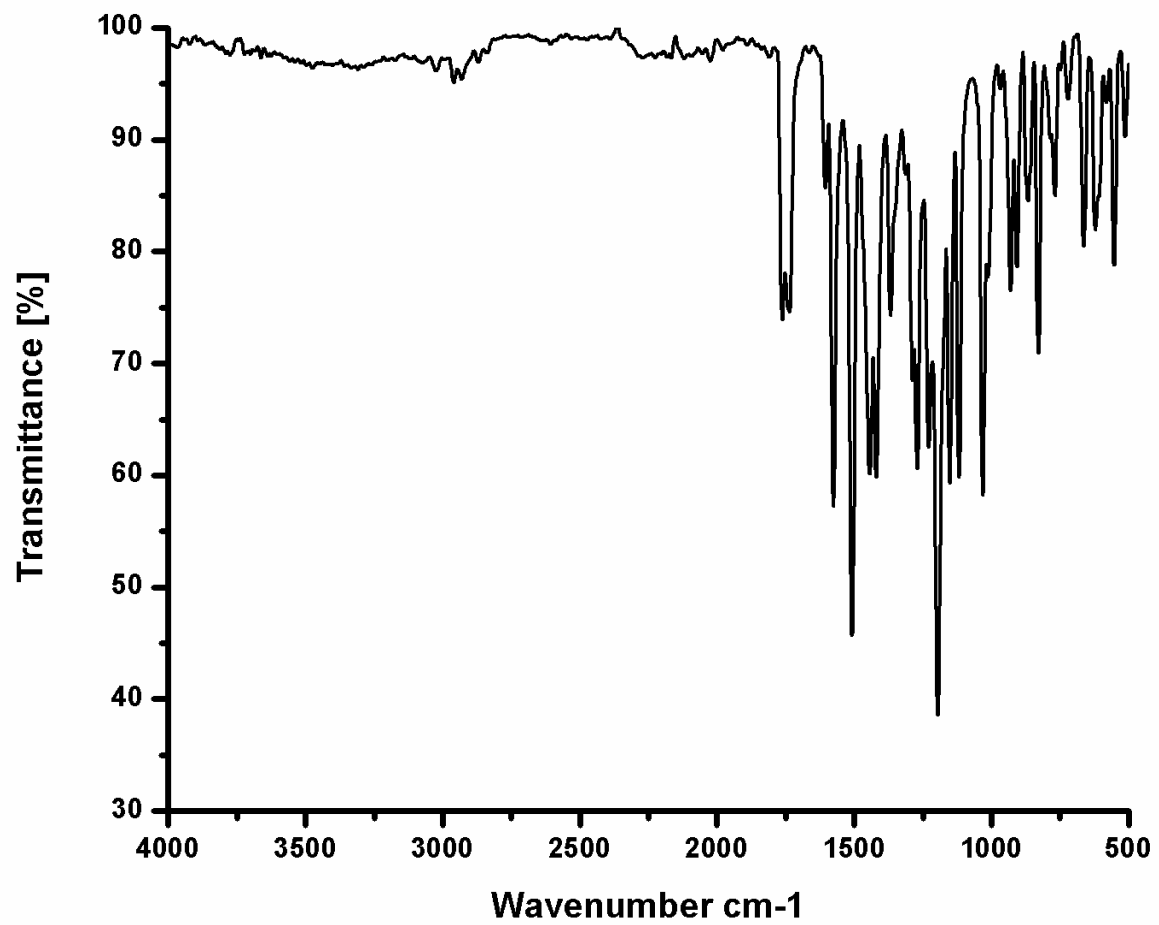

Figure S30. IR Spectrum of hydrogenated diacetyl-curcumin with Cu (II).



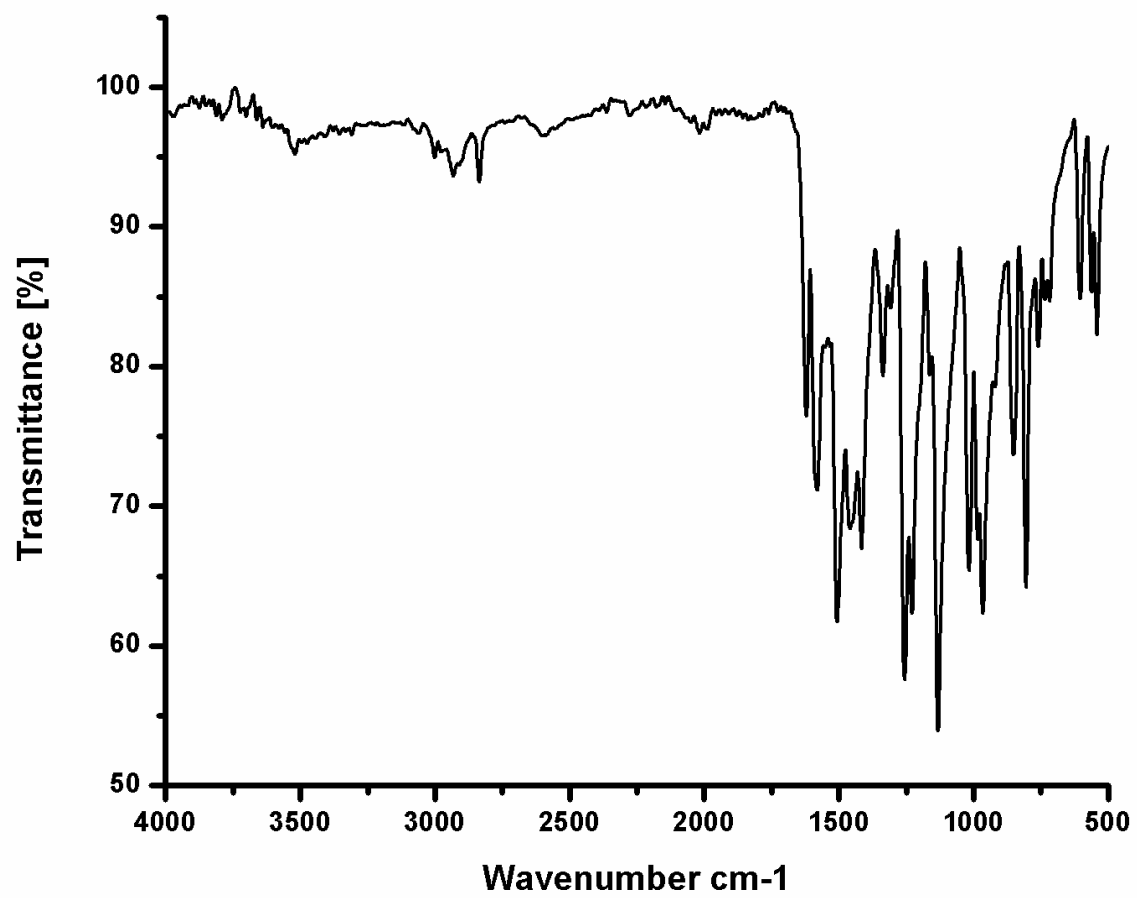

Figure S31. IR Spectrum of dimethoxy-curcumin.

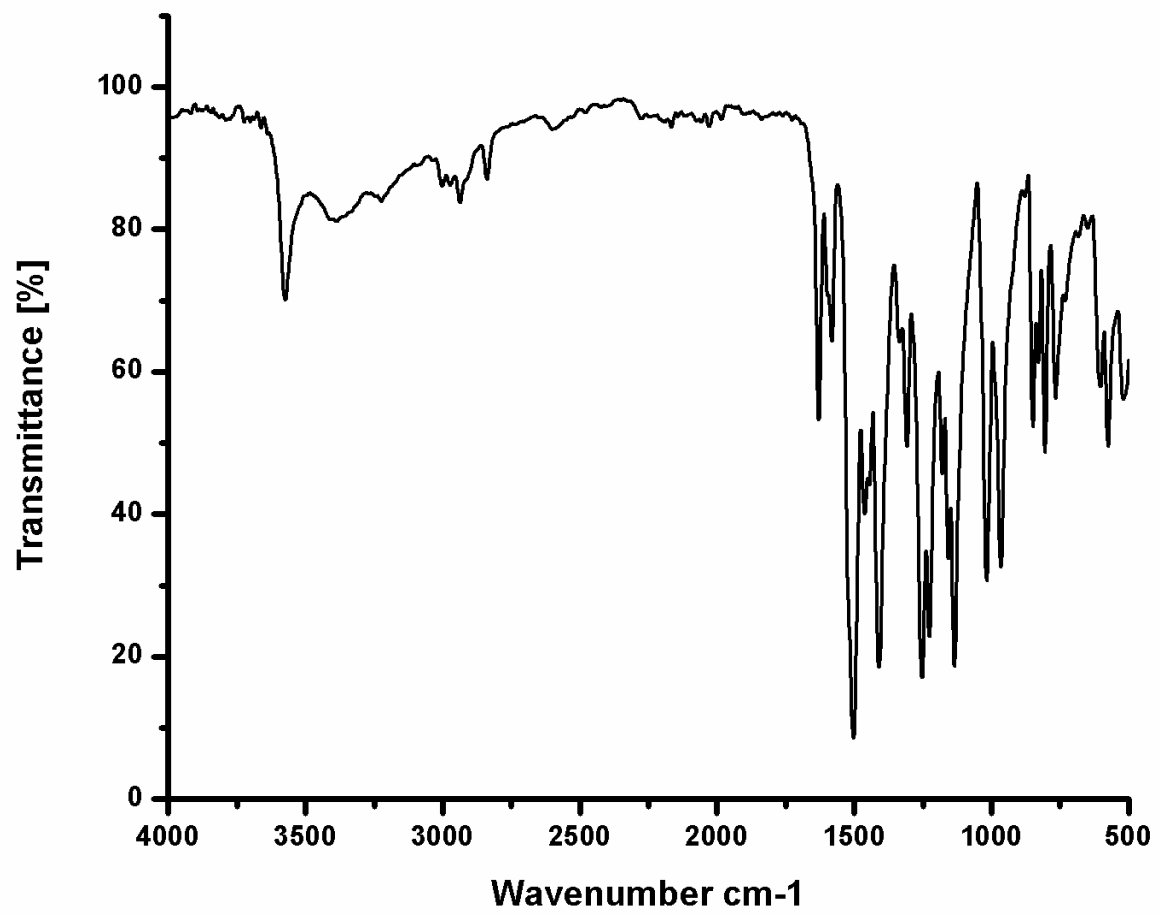

Figure S32. IR Spectrum of dimethoxy-curcumin with Cu (II).

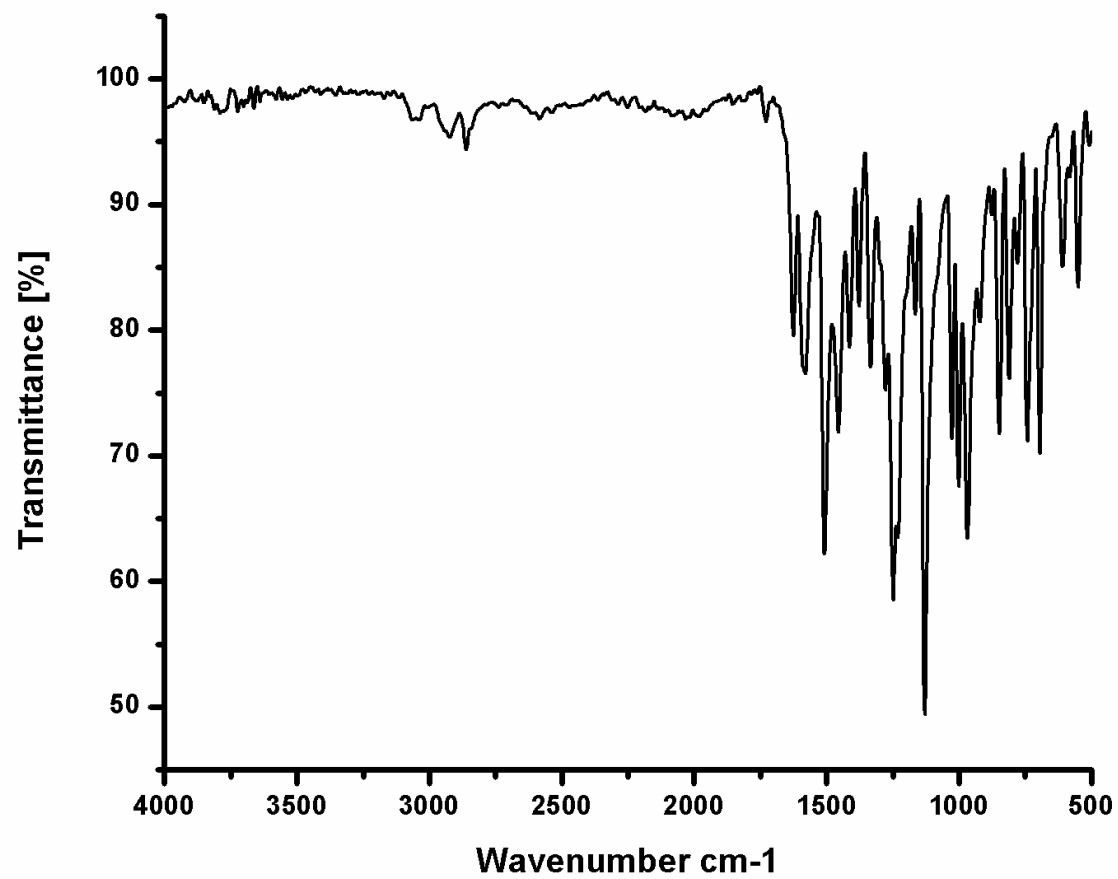

Figure S33. IR Spectrum of dibenzyl-curcumin.

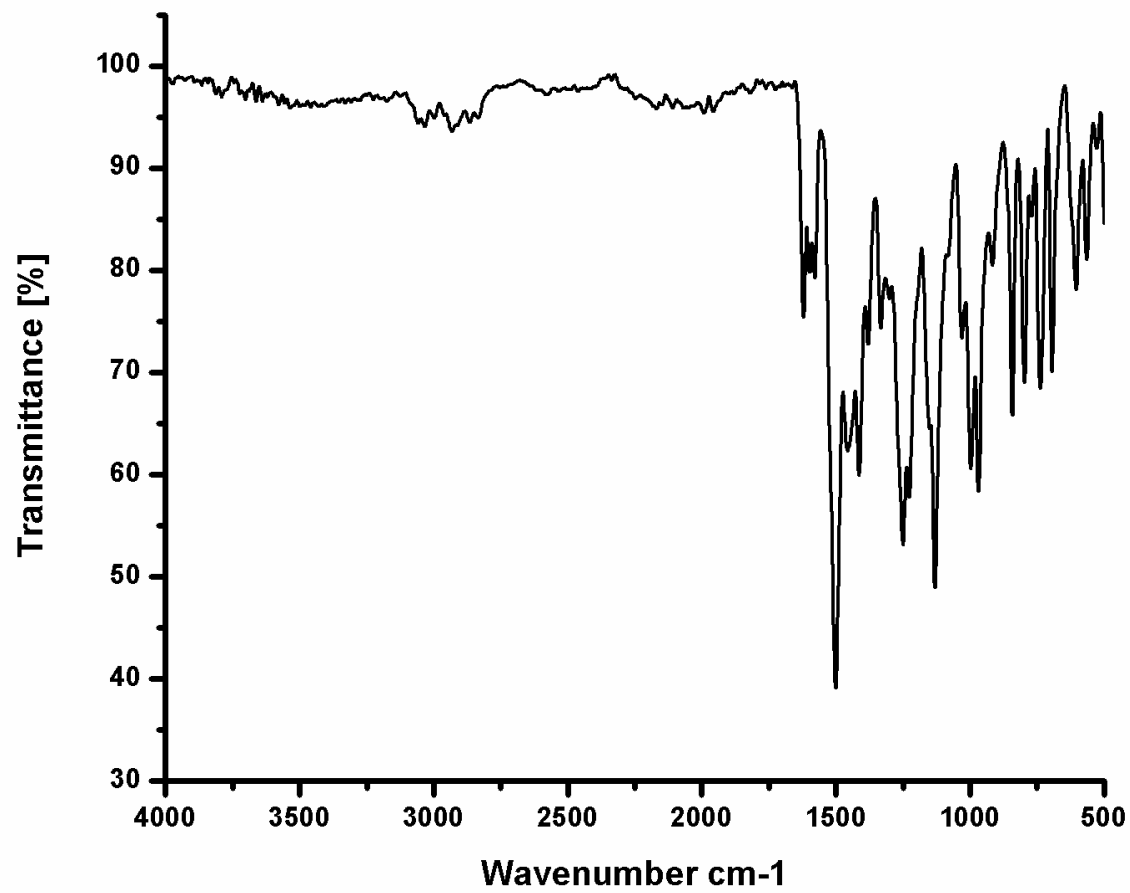

Figure S34. IR Spectrum of dibenzyl-curcumin with Cu (II).

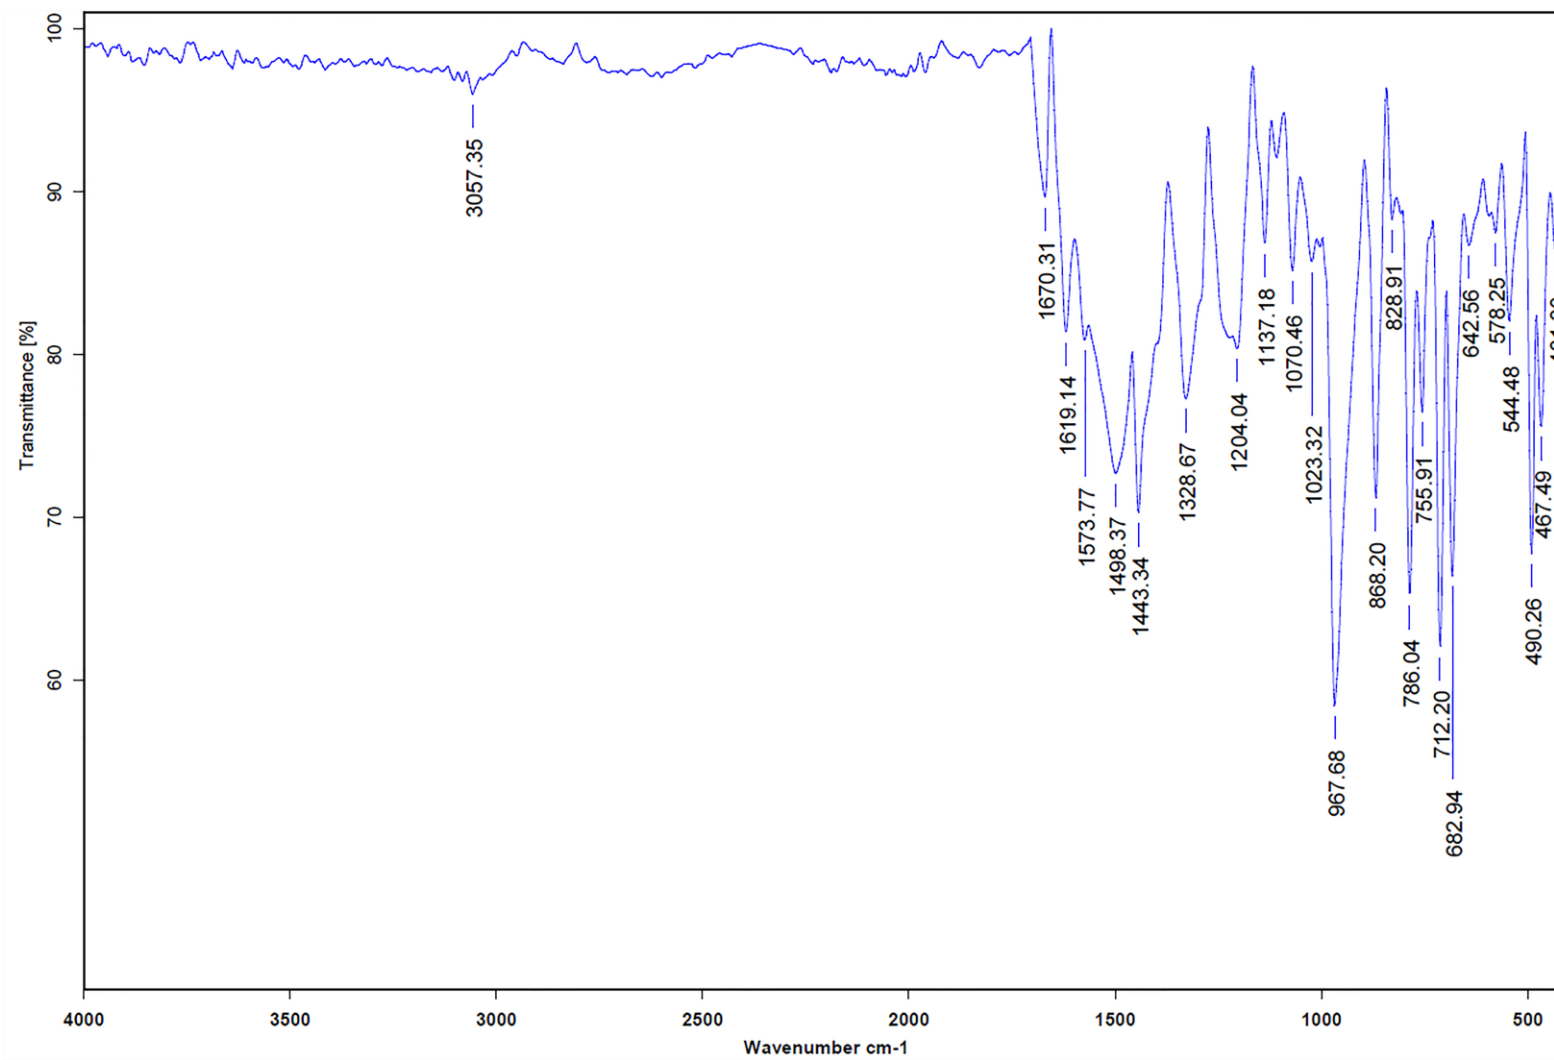

Figure S35. IR Spectrum of diphenyl-curcumin.

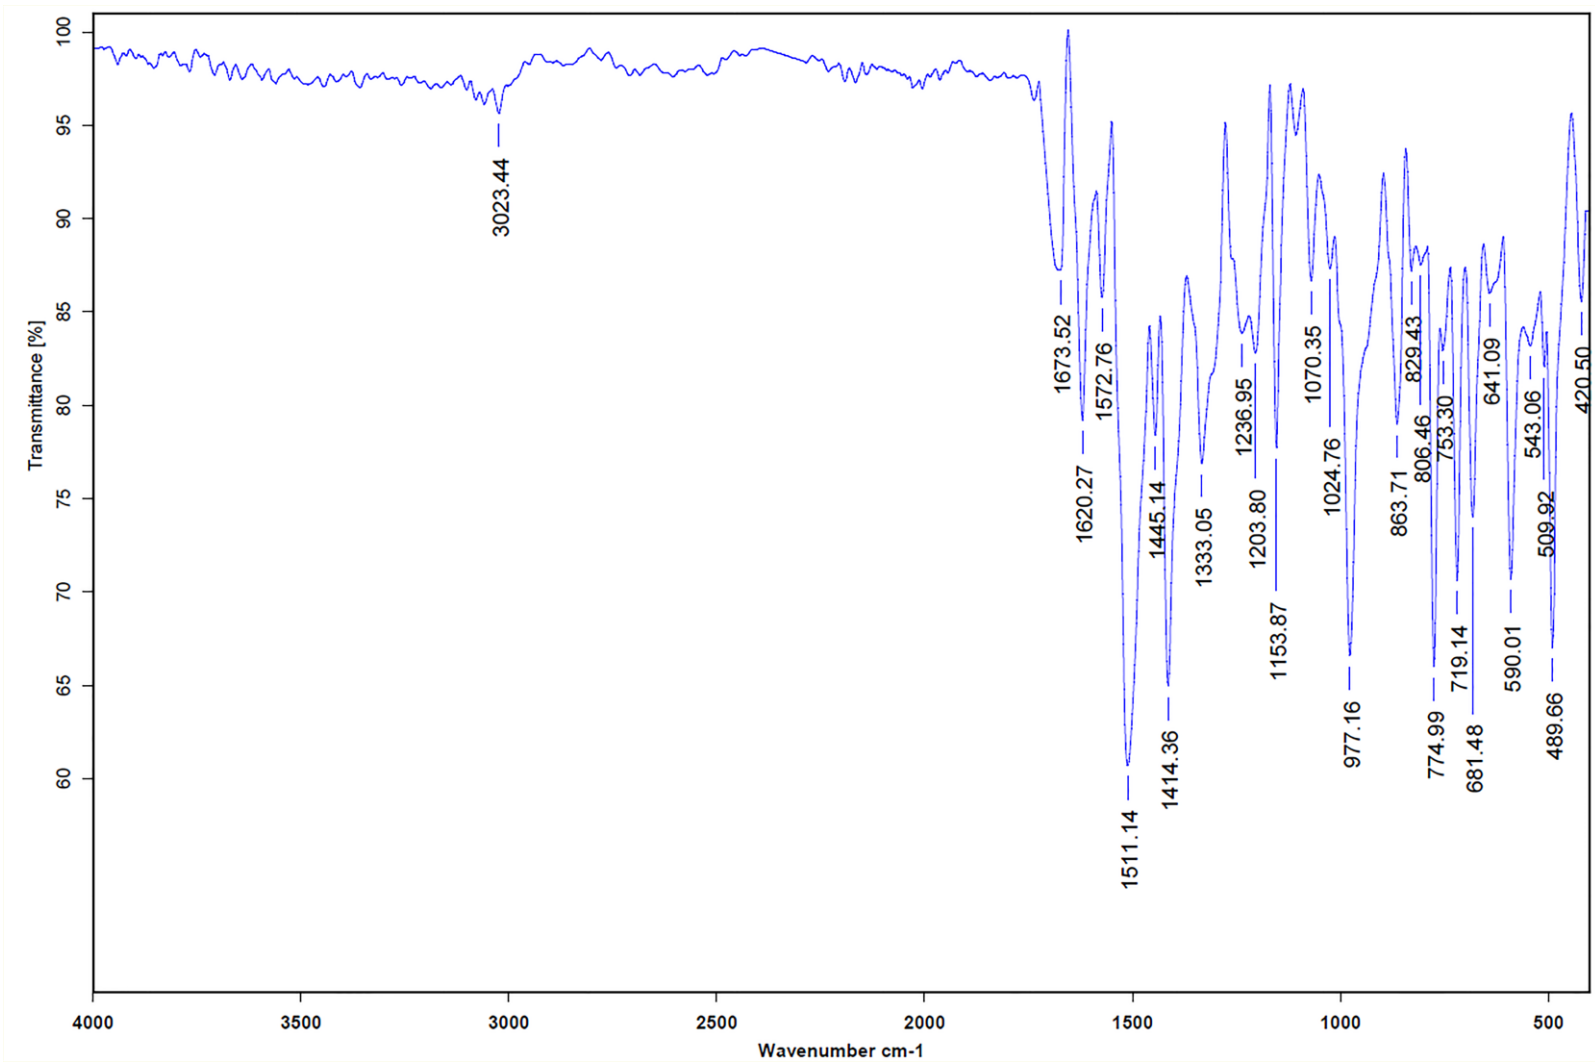

Figure S36. IR Spectrum of diphenyl-curcumin with Cu (II).

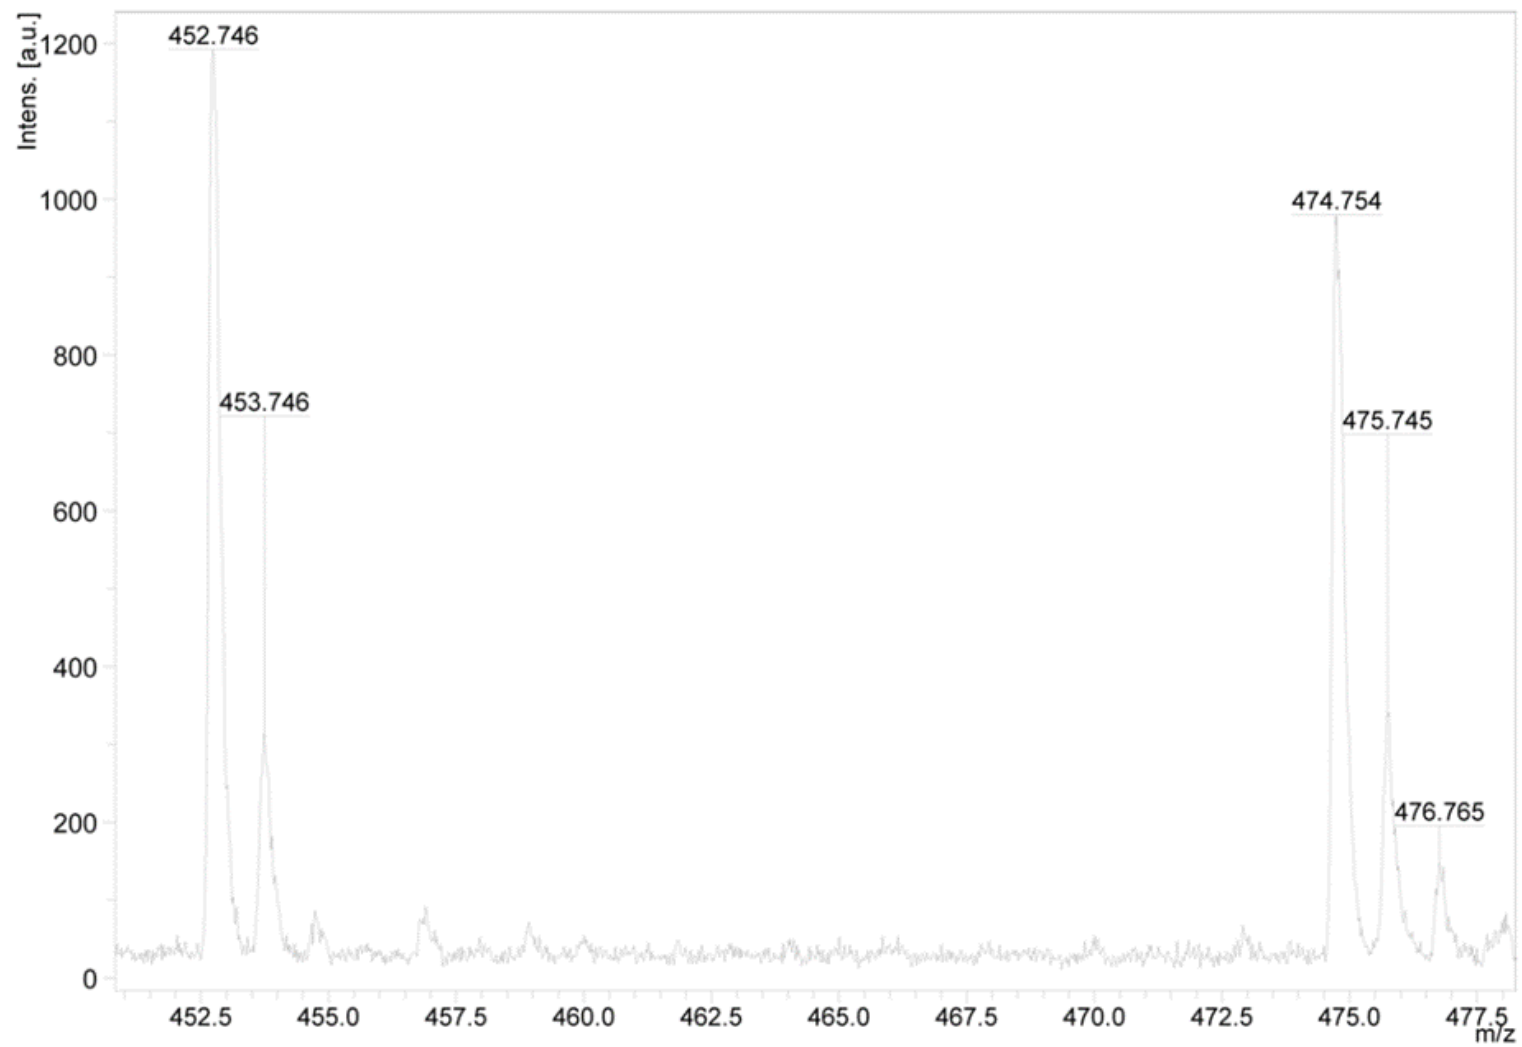

Figura S42. Mass Spectrum of diacetyl-curcumin.

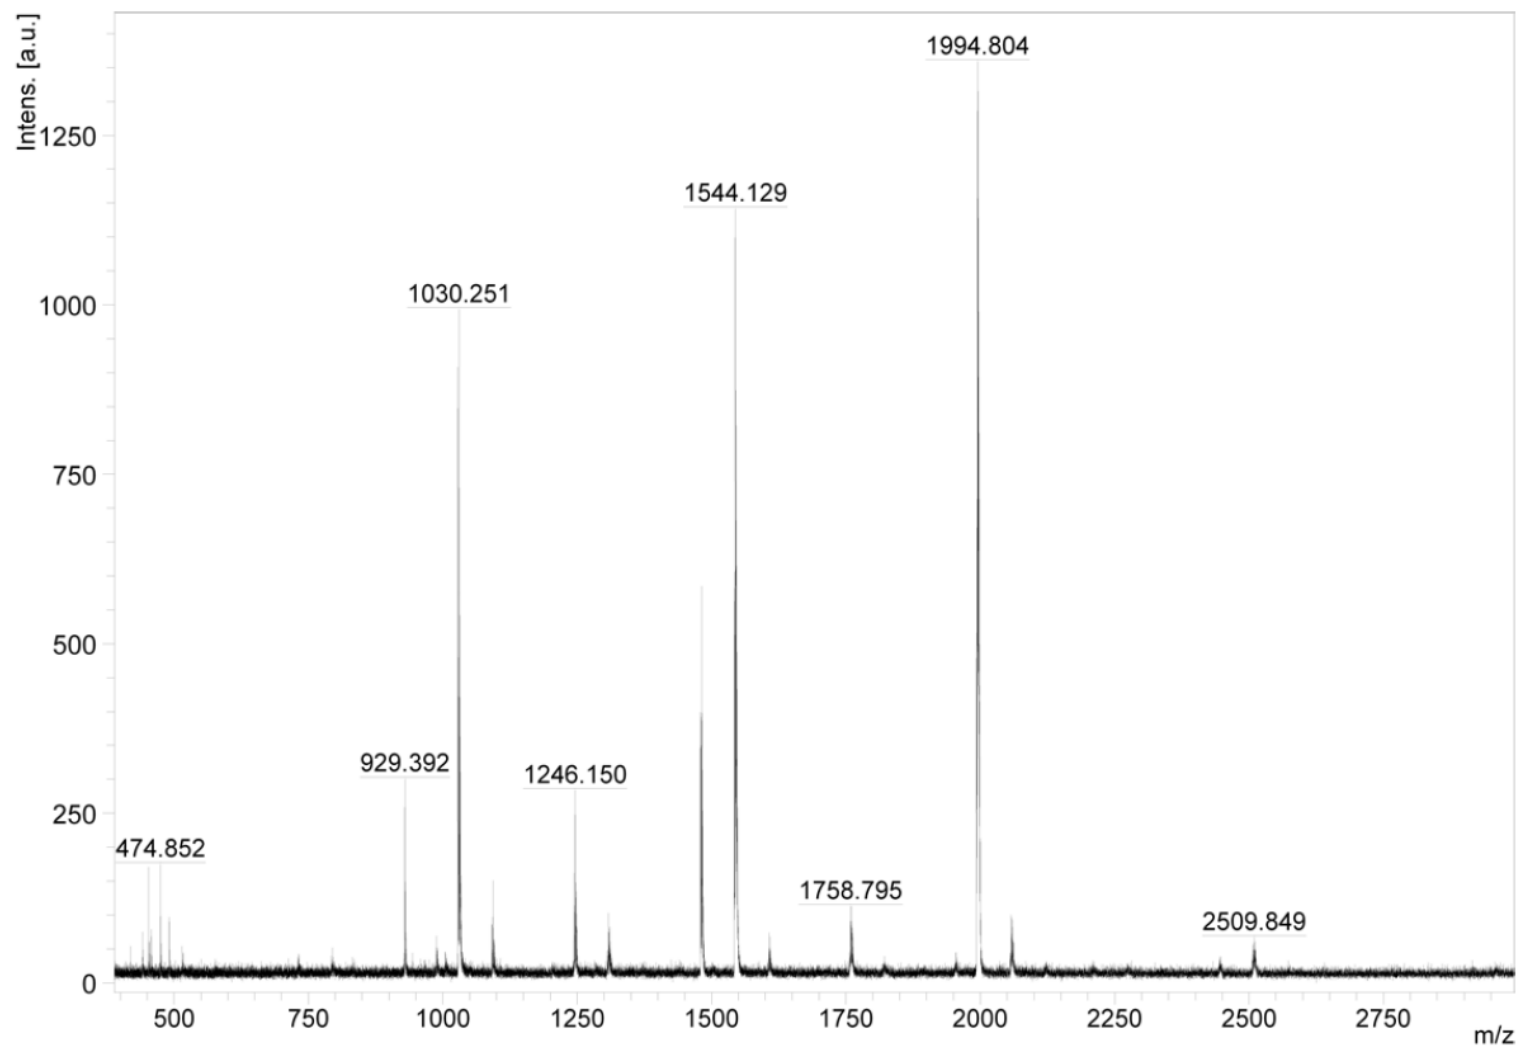

Figura S45. Mass Spectrum of diacetyl-curcumin.with Cu (II).



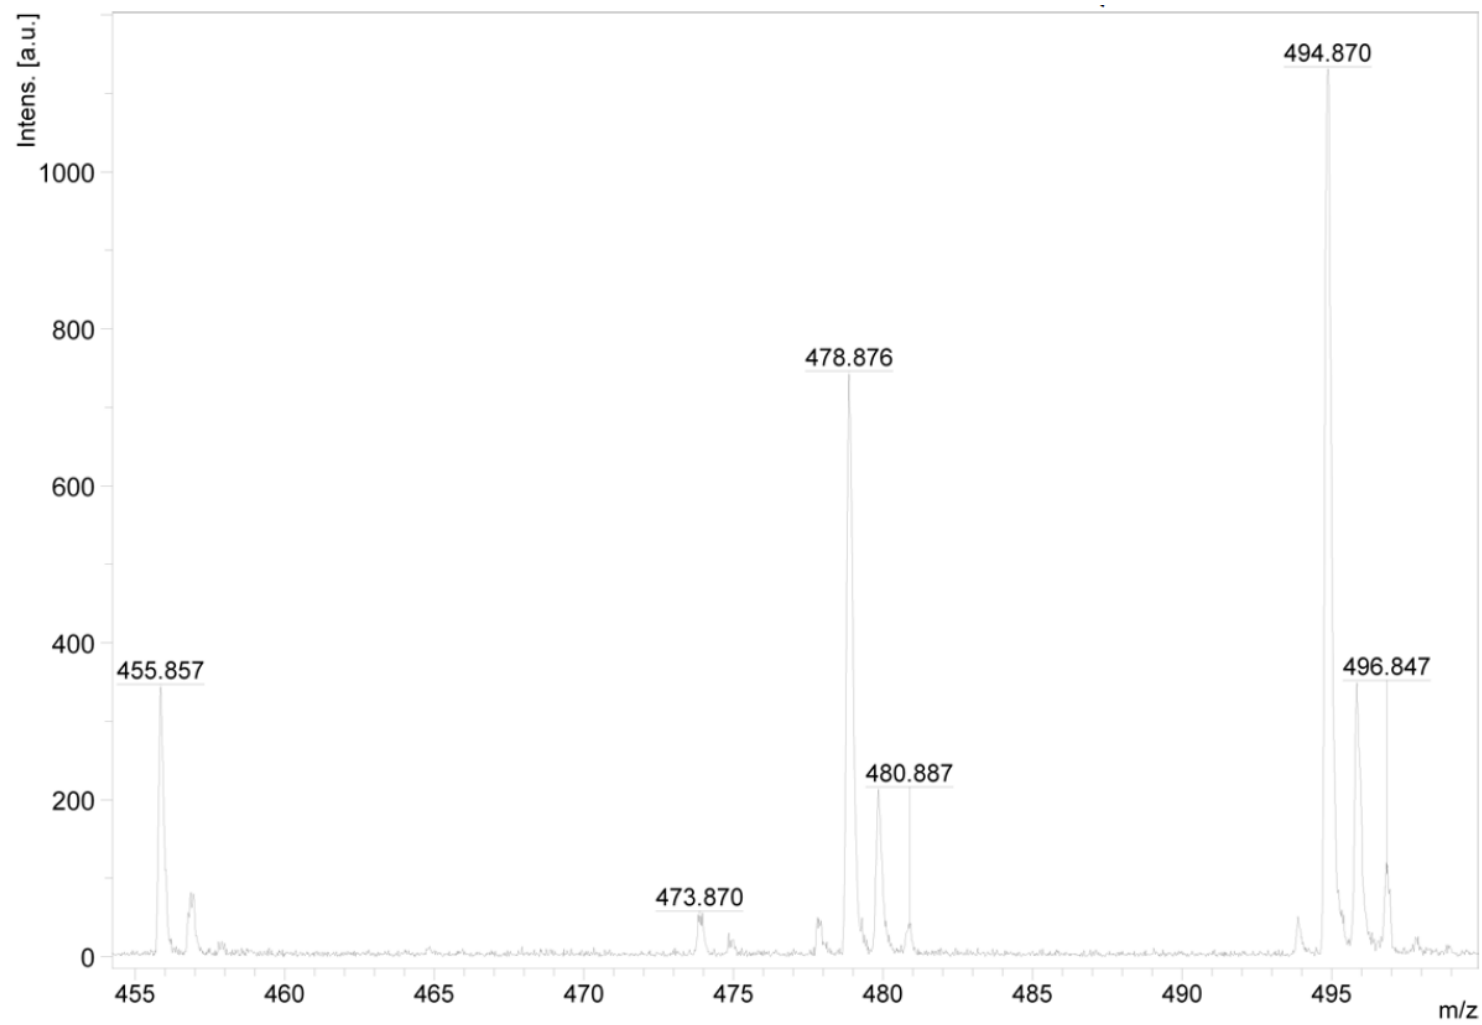

**Figura S42.** Mass Spectrum of hydrogenated diacetyl -curcumin.

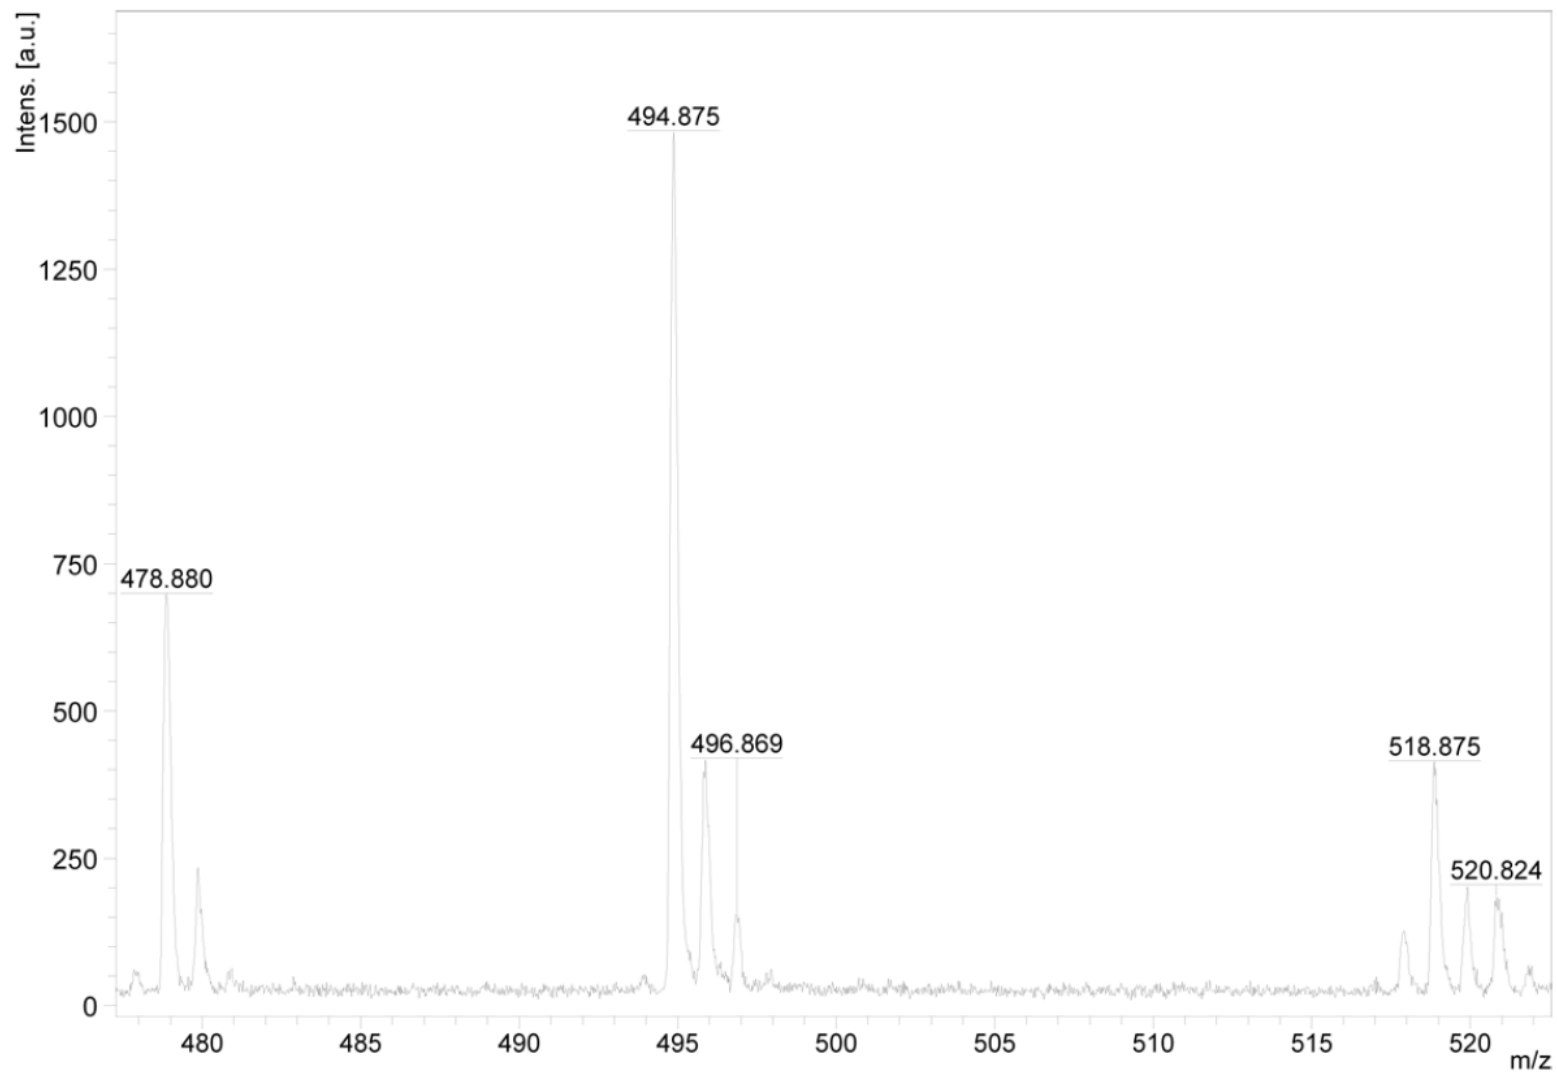

**Figura S45.** Mass Spectrum of hydrogenated diacetyl -curcumin.with Cu (II).

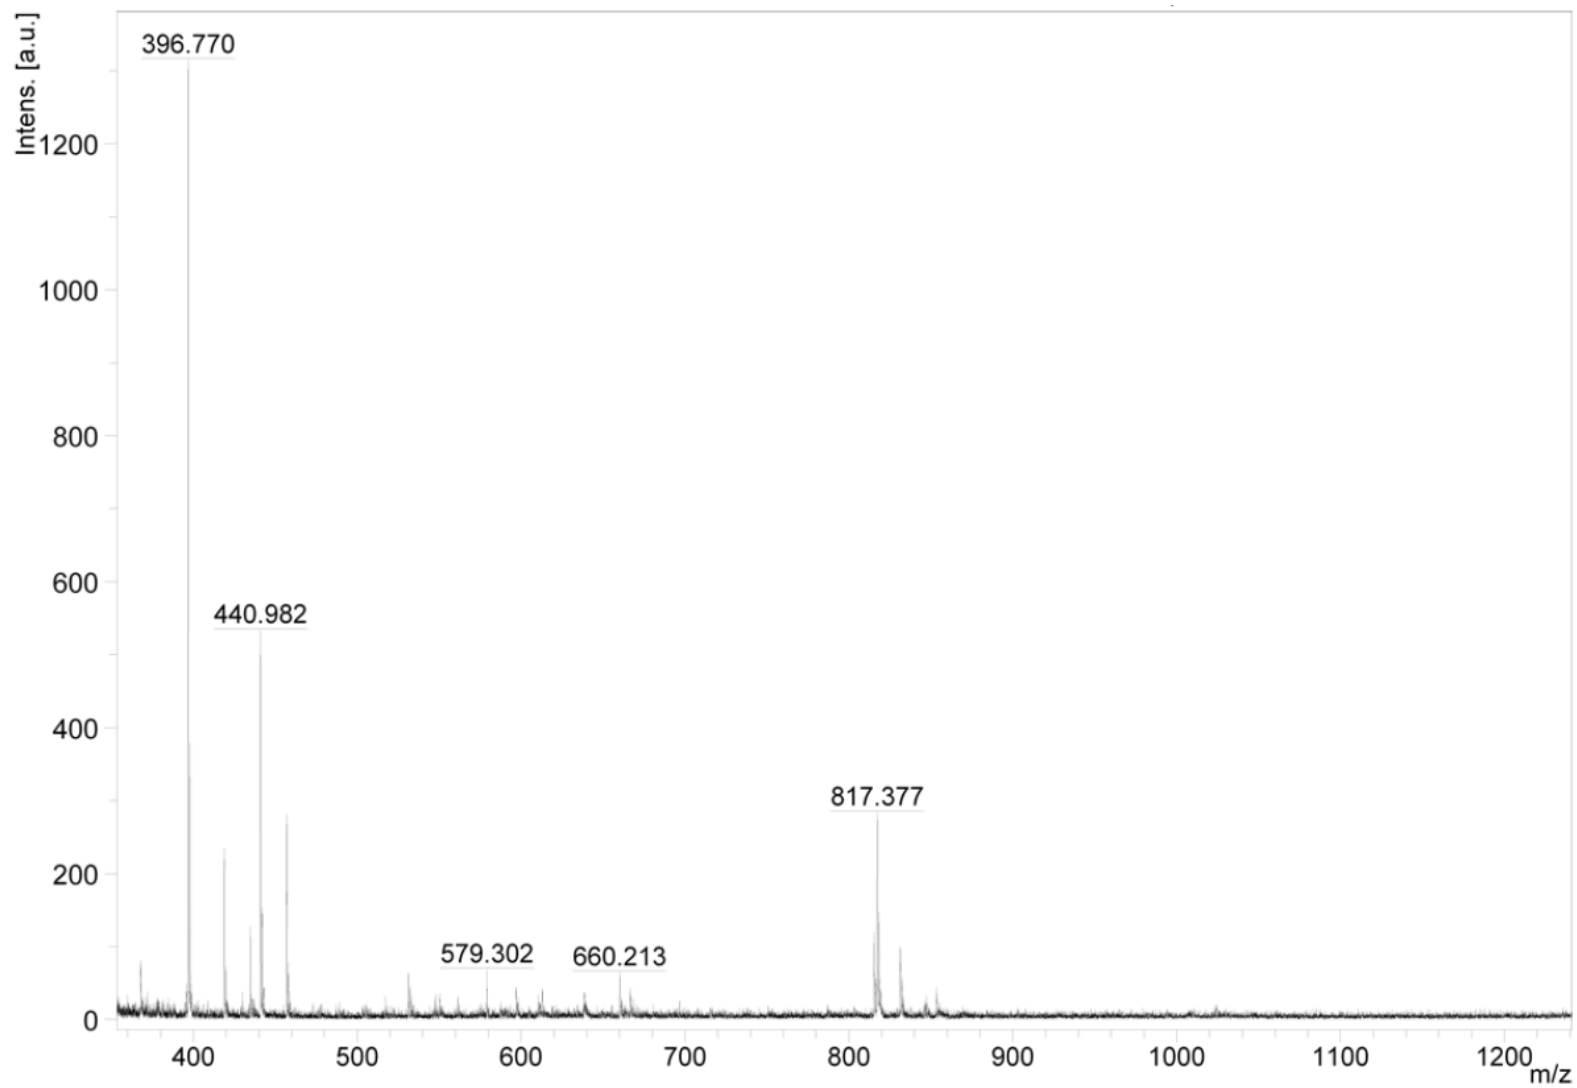

Figura S42. Mass Spectrum of dimethoxy-curcumin.

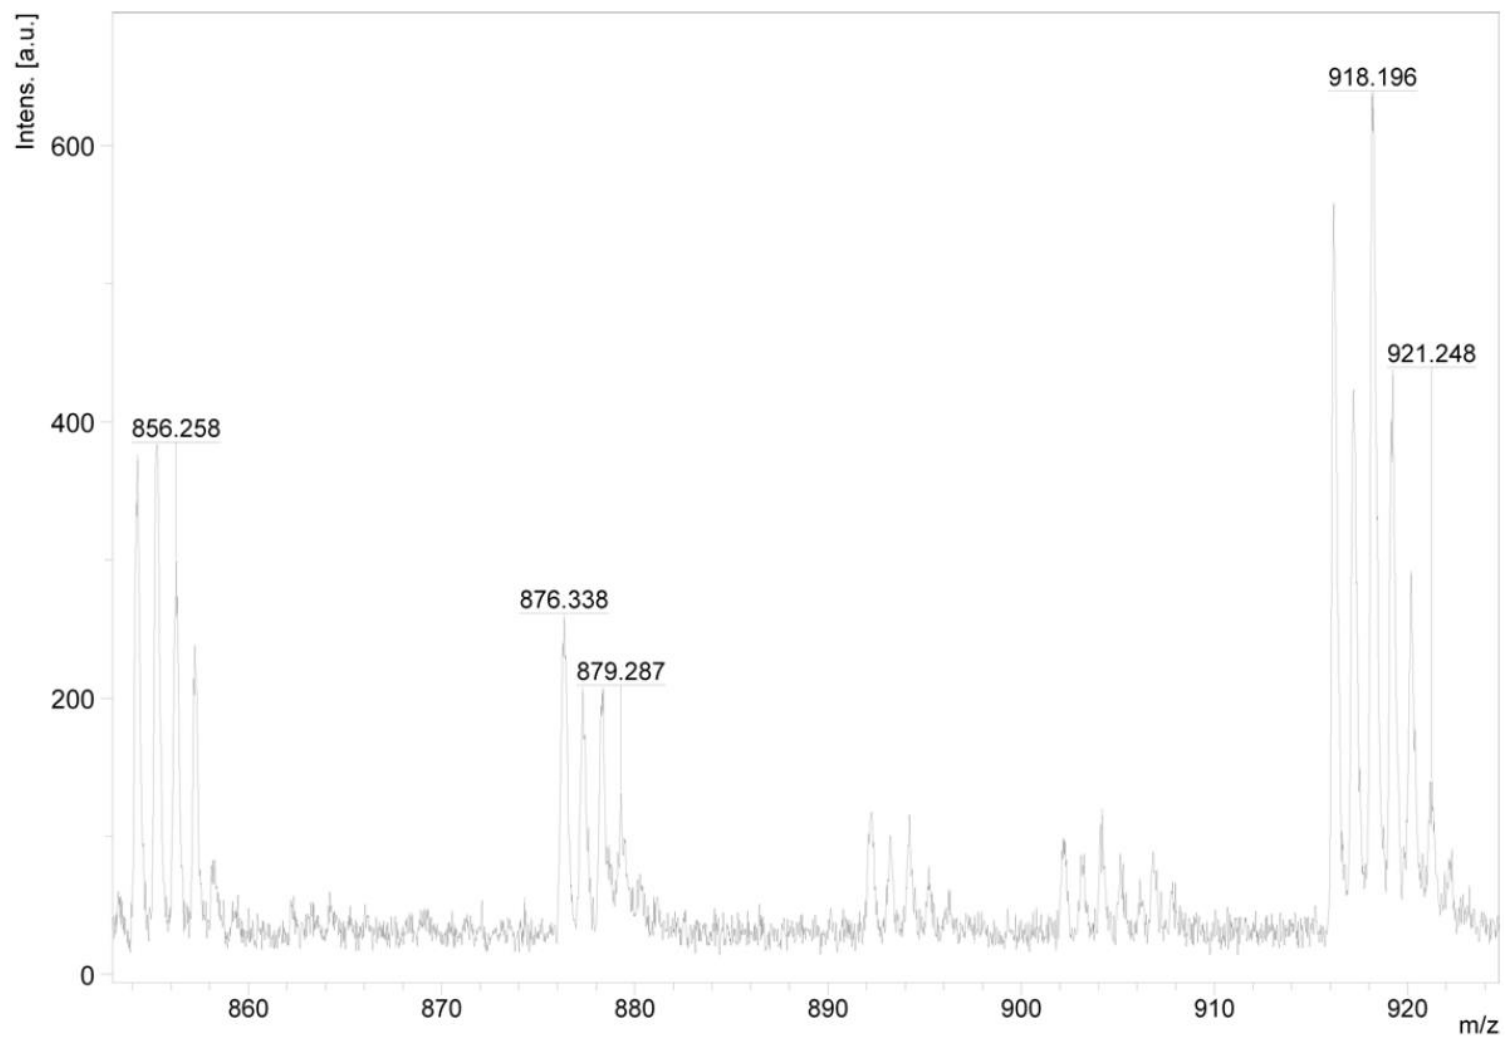

**Figura S45.** Mass Spectrum of dimethoxy-curcumin.with Cu (II).

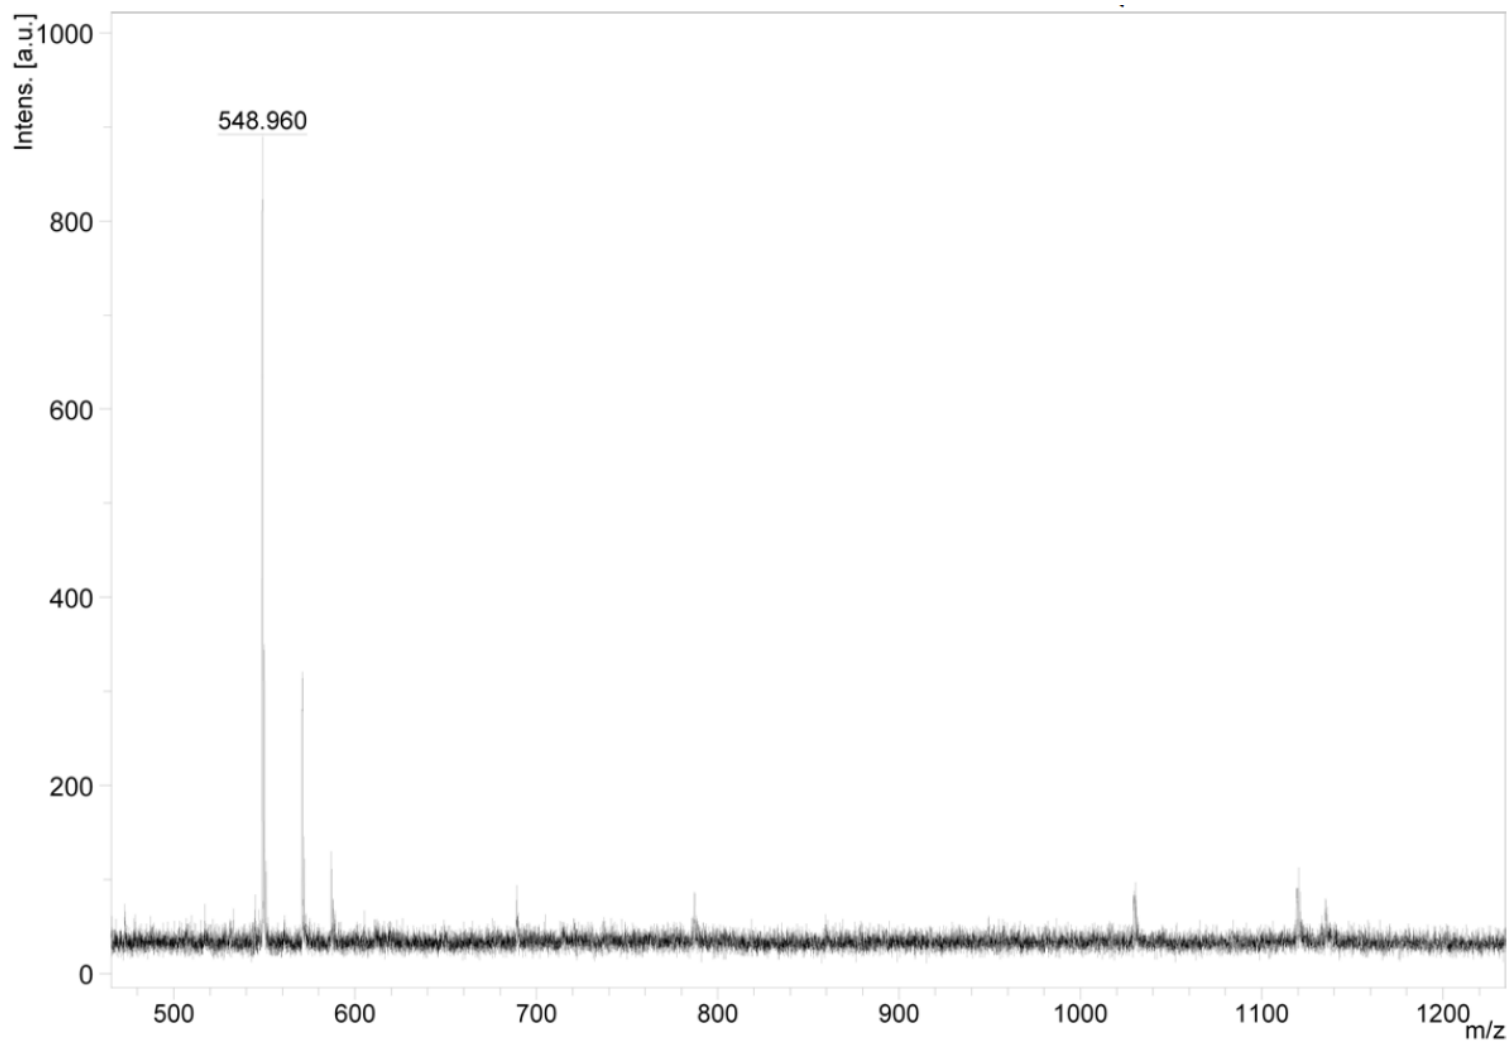

**Figura S42.** Mass Spectrum of dibenzyl-curcumin.

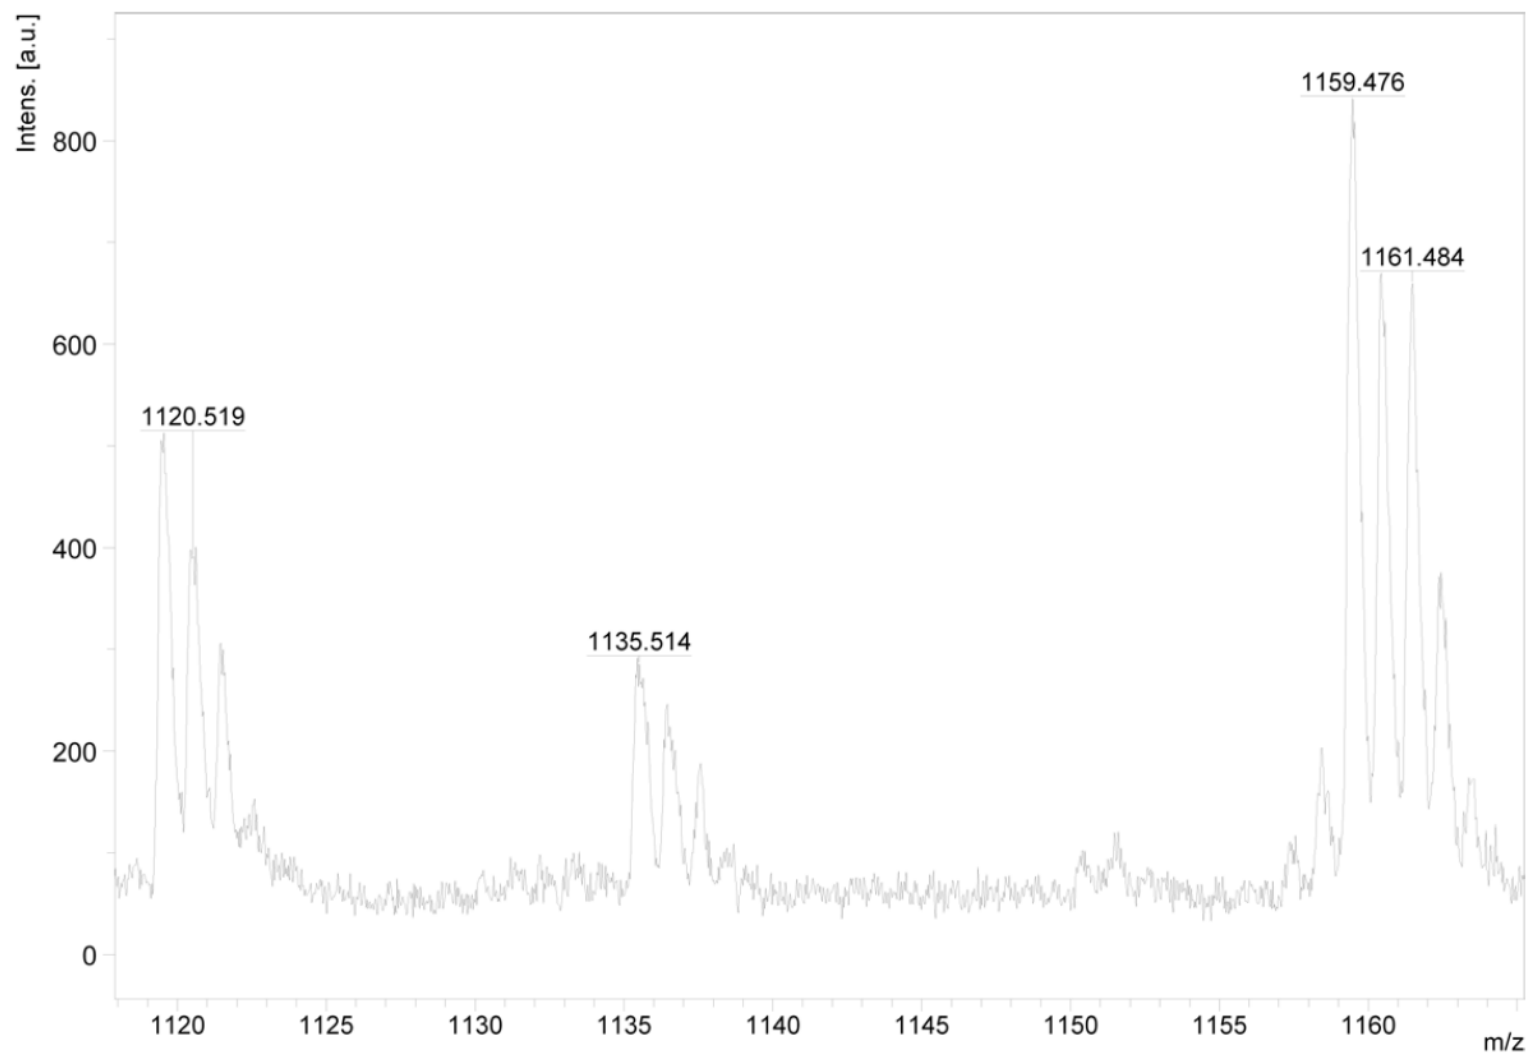

Figura S45. Mass Spectrum of dibenzyl-curcumin.with Cu (II).

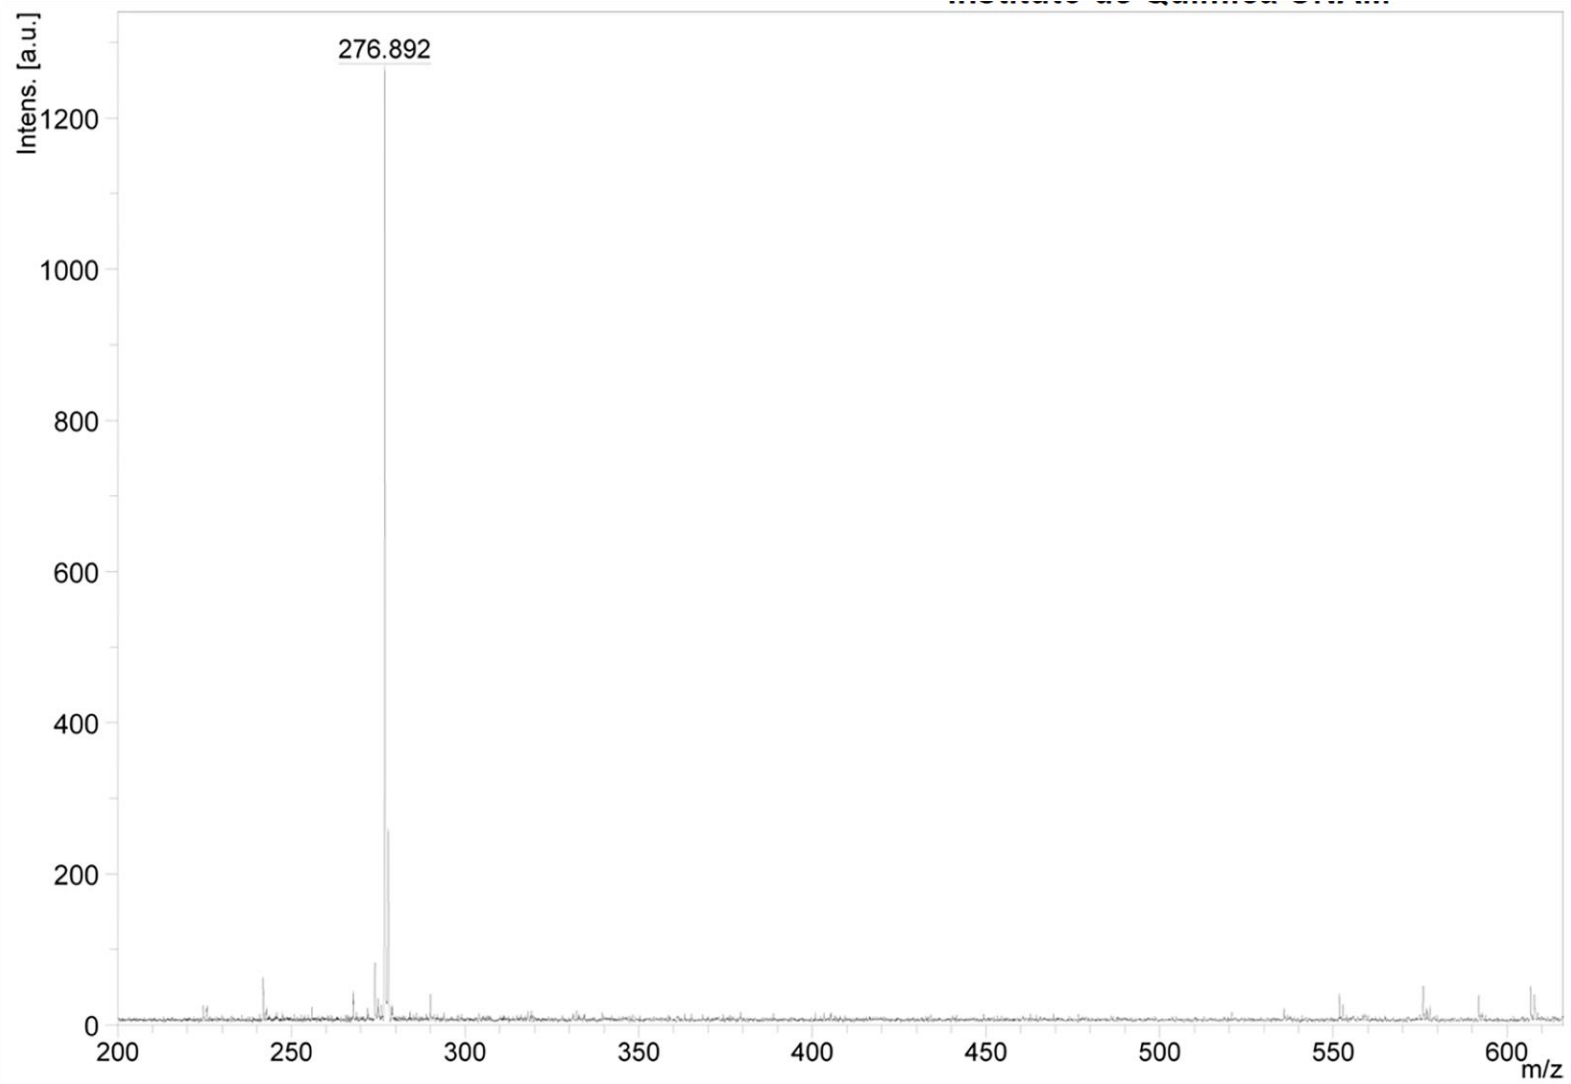

Figura S42. Mass Spectrum of diphenyl-curcumin.

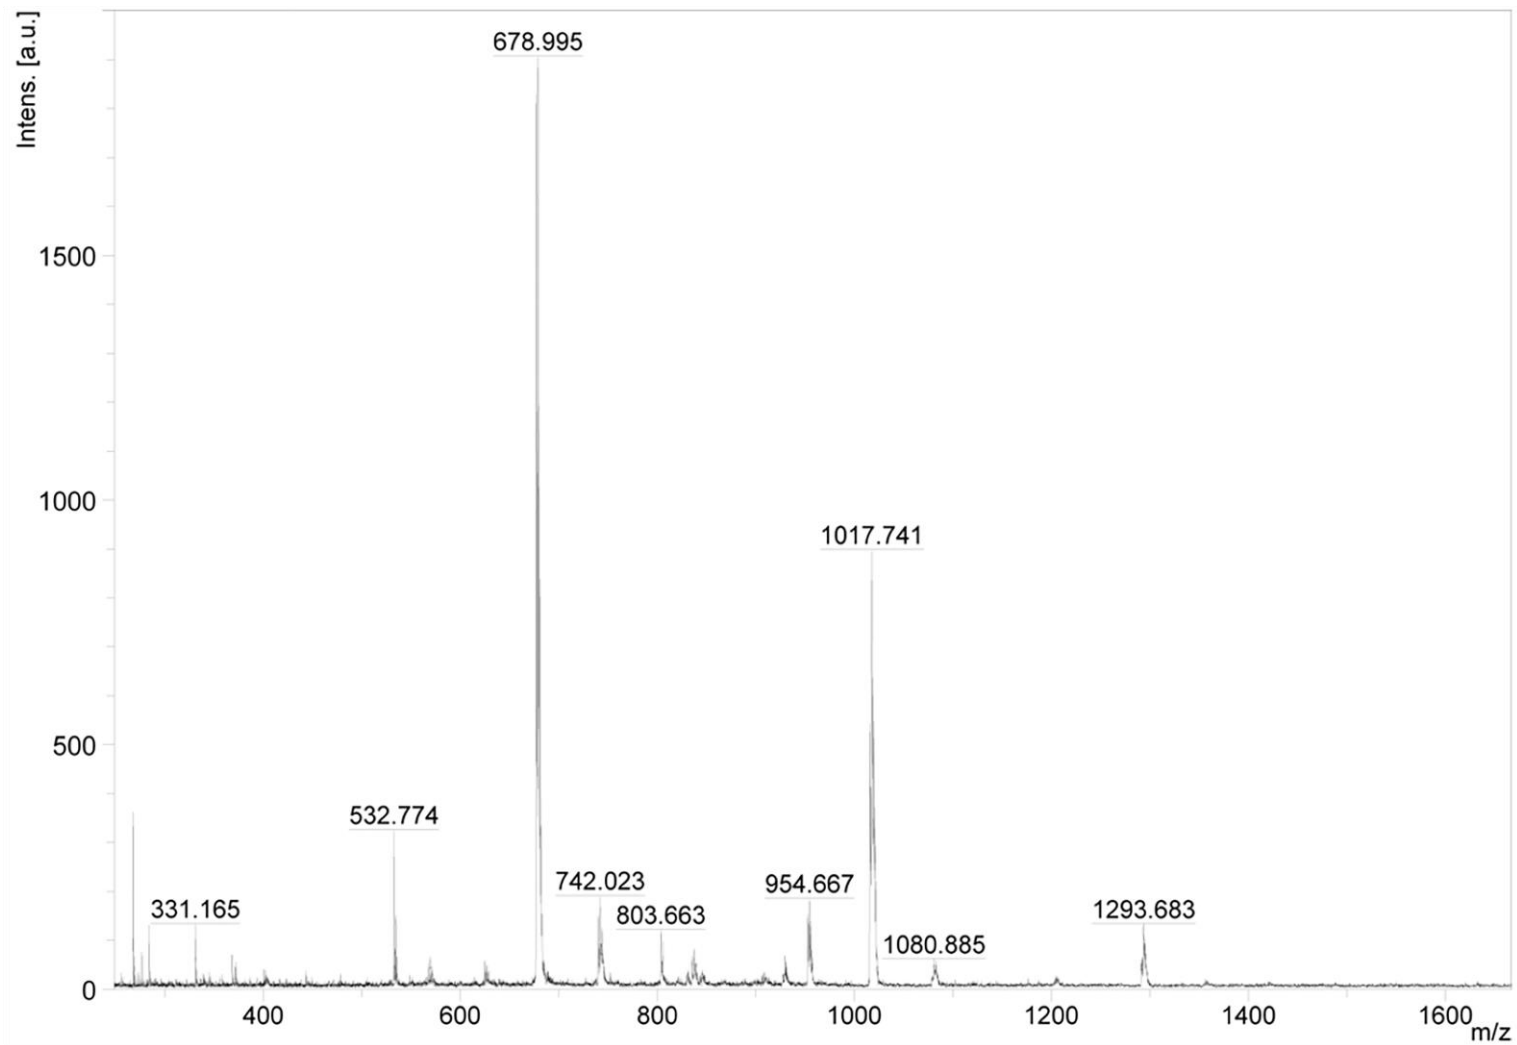

Figura S45. Mass Spectrum of diphenyl-curcumin.with Cu (II).



**Table S1.** Selected Geometric Parameters [ $\text{\AA}$ ,  $^\circ$ ] for Compound\_6-10.

Compound\_6.

---

|                   |           |
|-------------------|-----------|
| Cu(1)-O(2)        | 1.919(2)  |
| Cu(1)-O(1)        | 1.933(2)  |
| Cu(1)-O(31)       | 2.443(6)  |
| O(2)-Cu(1)-O(2)#1 | 180.0     |
| O(2)-Cu(1)-O(1)   | 93.58(8)  |
| O(2)#1-Cu(1)-O(1) | 86.42(8)  |
| O(1)-Cu(1)-O(1)#1 | 180.0     |
| O(2)-Cu(1)-O(31)  | 90.03(18) |
| O(1)-Cu(1)-O(31)  | 92.96(15) |

---

Symmetry transformations used to generate equivalent atoms: #1 -x+1,-y,-z+1

Compound\_7.

---

|                     |            |
|---------------------|------------|
| Cu(1)-O(1)          | 1.930(2)   |
| Cu(1)-O(1)#1        | 1.930(2)   |
| Cu(1)-O(2)          | 1.937(2)   |
| Cu(1)-O(2)#1        | 1.937(2)   |
| Cu(1)-O(5)#2        | 2.590(3)   |
| O(1)-Cu(1)-O(1)#1   | 180.00(16) |
| O(1)-Cu(1)-O(2)     | 92.78(10)  |
| O(1)#1-Cu(1)-O(2)   | 87.22(10)  |
| O(1)-Cu(1)-O(2)#1   | 87.22(10)  |
| O(1)#1-Cu(1)-O(2)#1 | 92.78(10)  |

---

|                     |            |
|---------------------|------------|
| O(2)-Cu(1)-O(2)#1   | 180.00(15) |
| O(1)-Cu(1)-O(5)#2   | 88.08(12)  |
| O(1)#1-Cu(1)-O(5)#2 | 91.92(12)  |
| O(2)-Cu(1)-O(5)#2   | 87.79(11)  |
| O(2)#1-Cu(1)-O(5)#2 | 92.21(11)  |

Compound\_8.

|                     |          |
|---------------------|----------|
| Cu(1)-O(2)#1        | 1.891(5) |
| Cu(1)-O(2)          | 1.891(5) |
| Cu(1)-O(1)#1        | 1.900(4) |
| Cu(1)-O(1)          | 1.900(4) |
| O(2)#1-Cu(1)-O(2)   | 180.0    |
| O(2)#1-Cu(1)-O(1)#1 | 92.8(2)  |
| O(2)-Cu(1)-O(1)#1   | 87.2(2)  |
| O(2)#1-Cu(1)-O(1)   | 87.2(2)  |
| O(2)-Cu(1)-O(1)     | 92.8(2)  |
| O(1)#1-Cu(1)-O(1)   | 180.0    |

Symmetry transformations used to generate equivalent atoms: #1 -x+2,-y+2,-z+1

## Compound\_9a.

|                     |            |
|---------------------|------------|
| Cu(1)-O(1)#1        | 1.8954(15) |
| Cu(1)-O(1)          | 1.8954(15) |
| Cu(1)-O(2)          | 1.9066(15) |
| Cu(1)-O(2)#1        | 1.9066(15) |
| O(1)#1-Cu(1)-O(1)   | 180.0      |
| O(1)#1-Cu(1)-O(2)   | 87.69(7)   |
| O(1)-Cu(1)-O(2)     | 92.31(7)   |
| O(1)#1-Cu(1)-O(2)#1 | 92.31(7)   |
| O(1)-Cu(1)-O(2)#1   | 87.69(7)   |
| O(2)-Cu(1)-O(2)#1   | 180.0      |

Symmetry transformations used to generate equivalent atoms: #1 -x+1,-y,-z+1

## Compound\_9b.

|                    |            |
|--------------------|------------|
| Cu(1)-O(42A)       | 1.862(5)   |
| Cu(1)-O(41)        | 1.9122(14) |
| Cu(1)-O(1)         | 1.9144(14) |
| Cu(1)-O(2)         | 1.9196(14) |
| Cu(1)-O(42B)       | 1.951(4)   |
| Cu(1)-O(42)        | 1.952(4)   |
| O(42A)-Cu(1)-O(41) | 100.3(3)   |
| O(42A)-Cu(1)-O(1)  | 80.2(3)    |
| O(41)-Cu(1)-O(1)   | 177.40(7)  |
| O(42A)-Cu(1)-O(2)  | 168.7(2)   |
| O(41)-Cu(1)-O(2)   | 85.78(6)   |

|                    |          |
|--------------------|----------|
| O(1)-Cu(1)-O(2)    | 93.27(6) |
| O(41)-Cu(1)-O(42B) | 91.6(2)  |
| O(1)-Cu(1)-O(42B)  | 89.2(2)  |
| O(2)-Cu(1)-O(42B)  | 175.8(5) |
| O(41)-Cu(1)-O(42)  | 92.3(2)  |
| O(1)-Cu(1)-O(42)   | 88.5(2)  |
| O(2)-Cu(1)-O(42)   | 176.4(5) |

Compound\_10.

|                     |            |
|---------------------|------------|
| Cu(1)-O(1)#1        | 1.9030(12) |
| Cu(1)-O(1)          | 1.9031(12) |
| Cu(1)-O(2)          | 1.9107(13) |
| Cu(1)-O(2)#1        | 1.9107(13) |
| O(1)#1-Cu(1)-O(1)   | 180.0      |
| O(1)#1-Cu(1)-O(2)   | 86.89(5)   |
| O(1)-Cu(1)-O(2)     | 93.11(5)   |
| O(1)#1-Cu(1)-O(2)#1 | 93.11(5)   |
| O(1)-Cu(1)-O(2)#1   | 86.89(5)   |
| O(2)-Cu(1)-O(2)#1   | 180.0      |

Symmetry transformations used to generate equivalent atoms: #1 -x+1,-y,-z+1

**Table S2.** Selected Torsion Angles for Compounds **6** to **10**

| Torsion Angle           | Compound <b>6</b> | Compound <b>7</b> | Compound <b>8</b> | Compound <b>9a</b> | Compound <b>9b</b> | Compound <b>10</b> |
|-------------------------|-------------------|-------------------|-------------------|--------------------|--------------------|--------------------|
| C(8)-C(1)-C(2)-C(3)     | 176.0(3)          | -168.7(4)         | 179.9(7)          | 172.7(2)           | -174.2(2)          | 177.96(18)         |
| C(1)-C(2)-C(3)-C(4)     | 178.1(3)          | -134.9(4)         | 178.2(8)          | -176.7(2)          | -168.0(2)          | 178.8(2)           |
| C(2)-C(3)-C(4)-C(5)     | 179.5(3)          | -179.7(4)         | 179.6(8)          | 177.7(2)           | -173.2(2)          | 178.4(2)           |
| C(3)-C(4)-C(5)-C(6)     | 175.5(3)          | -172.6(4)         | -178.1(8)         | 176.5(2)           | 174.7(2)           | 177.6(2)           |
| C(4)-C(5)-C(6)-C(7)     | 175.5(3)          | -148.0(5)         | 178.1(8)          | -173.3(2)          | -169.7(2)          | -175.8(2)          |
| C(5)-C(6)-C(7)-C(14)    | 177.5(3)          | -161.5(4)         | -177.8(8)         | 173.5(3)           | -179.2(4)          | 179.62(18)         |
| C(48)-C(41)-C(42)-C(43) |                   |                   |                   |                    | -176.4(2)          |                    |
| C(41)-C(42)-C(43)-C(44) |                   |                   |                   |                    | -168.3(5)          |                    |
| C(42)-C(43)-C(44)-C(45) |                   |                   |                   |                    | -173.2(10)         |                    |
| C(43)-C(44)-C(45)-C(46) |                   |                   |                   |                    | 173.8(10)          |                    |
| C(44)-C(45)-C(46)-C(47) |                   |                   |                   |                    | -174.6(16)         |                    |
| C(45)-C(46)-C(47)-C(54) |                   |                   |                   |                    | 179.6(16)          |                    |
